# Supplementary material for: From research to applications – examples of operational ensemble post-processing in France using machine learning
Source: Copernicus journal article supplement (doi:10.5194/npg-27-329-2020), 2020-05-29
Supplement: Supplementary file 1 [file npg-27-329-2020-supplement.zip]

Archive with 17 entries (17 files):
- fig8.pdf
- crps24.pdf
- scoret.pdf
- npg-27-329-2020-supplement-title-page.pdf
- aurelhy.pdf
- testfig77.pdf
- flowchart.pdf
- figure6.pdf
- testfig99.pdf
- flowchart_maximus.pdf
- zones.pdf
- stationseurw.pdf
- pssmax.pdf
- cartqrf.pdf
- eventzero.pdf
- resultf.pdf
- cumuls221019.pdf
