# Supplementary material for: From research to applications – examples of operational ensemble post-processing in France using machine learning
Source: Copernicus journal article supplement (doi:10.5194/npg-27-329-2020), 2020-05-29

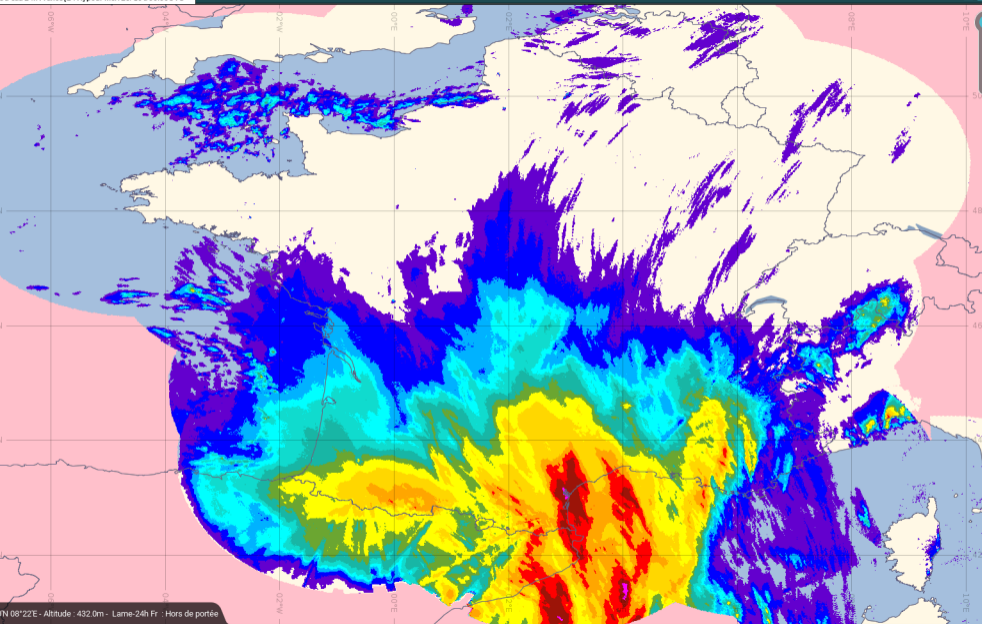

quantile PEARO 0.1 GRF TAIL RR24 day Date: 2019-10-21 Res: 9

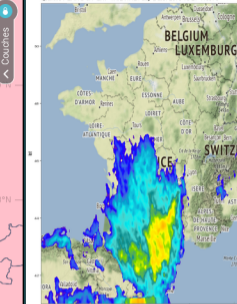

quantile PEARO 0.5 GRF TAIL RR24 day Date: 2019-10-21 Res: 9

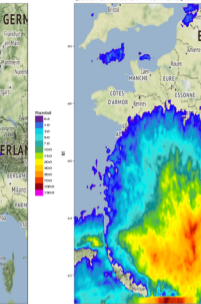

quantile PEARO 0.9 GRF TAIL RR24 day Date: 2019-10-21 Res: 9

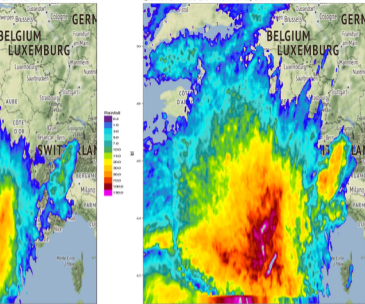

quantile PEARO 0.1 RAW RR24 day Date: 2019-10-21 Res: 9

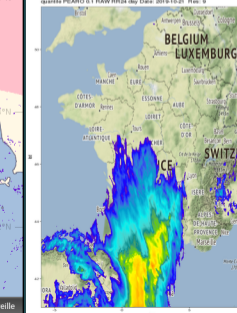

quantile PEARO 0.5 RAW RR24 day Date: 2019-10-21 Res: 9

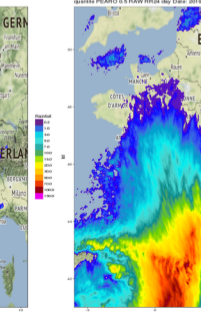

quantile PEARO 0.9 RAW RR24 day Date: 2019-10-21 Res: 9

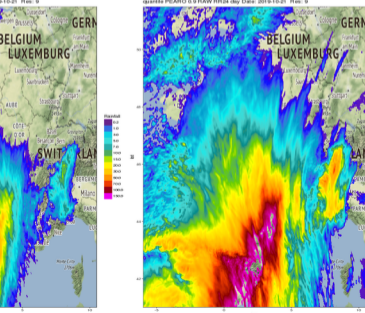

Supplement: Supplementary file 1 [file npg-27-329-2020-supplement.zip › cumuls221019.pdf]
