# Supplementary material for: From research to applications – examples of operational ensemble post-processing in France using machine learning
Source: Copernicus journal article supplement (doi:10.5194/npg-27-329-2020), 2020-05-29
Supplement: Supplementary file 1 [file npg-27-329-2020-supplement.zip › npg-27-329-2020-supplement-title-page.pdf]

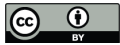

## *Supplement of*

# **From research to applications – examples of operational ensemble post-processing in France using machine learning**

**Maxime Taillardat and Olivier Mestre**

*Correspondence to:* Maxime Taillardat ([maxime.taillardat@meteo.fr](mailto:maxime.taillardat@meteo.fr))

- [npg-27-329-2020-supplement-title-page.pdf](#)
- [aurelhy.pdf](#)
- [cartqrf.pdf](#)
- [crps24.pdf](#)
- [cumuls221019.pdf](#)
- [eventzero.pdf](#)
- [fig8.pdf](#)
- [figure6.pdf](#)
- [flowchart.pdf](#)
- [flowchart\\_maximus.pdf](#)
- [pssmax.pdf](#)
- [resultf.pdf](#)
- [scoret.pdf](#)
- [stationseurw.pdf](#)
- [testfig77.pdf](#)
- [testfig99.pdf](#)
- [zones.pdf](#)

The copyright of individual parts of the supplement might differ from the CC BY 4.0 License.
