# Supplementary figures and images for: From research to applications – examples of operational ensemble post-processing in France using machine learning
Source: Copernicus journal article supplement (doi:10.5194/npg-27-329-2020), 2020-05-29

Base: 20190310180000    Lead Time: 42 Member: 16  
PG1PEARP : T

Temperature (°C)

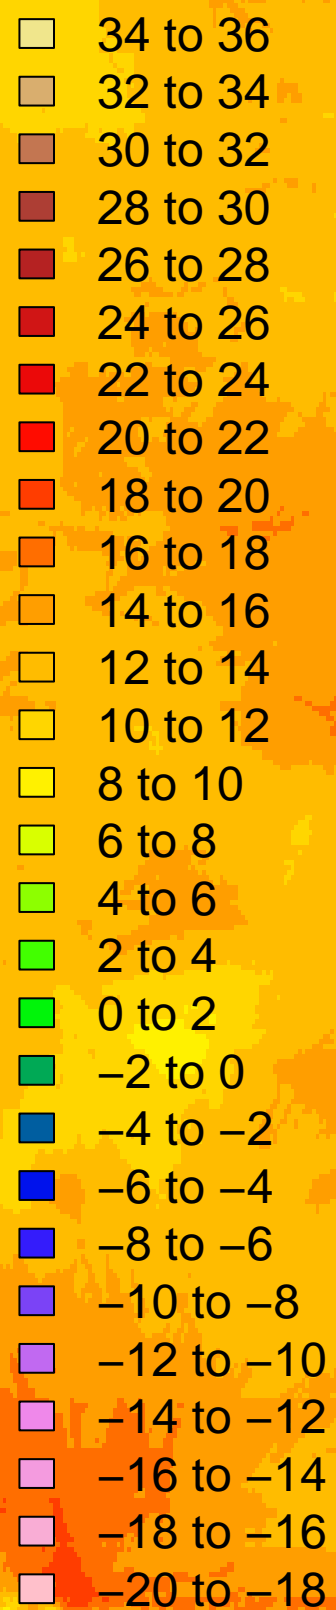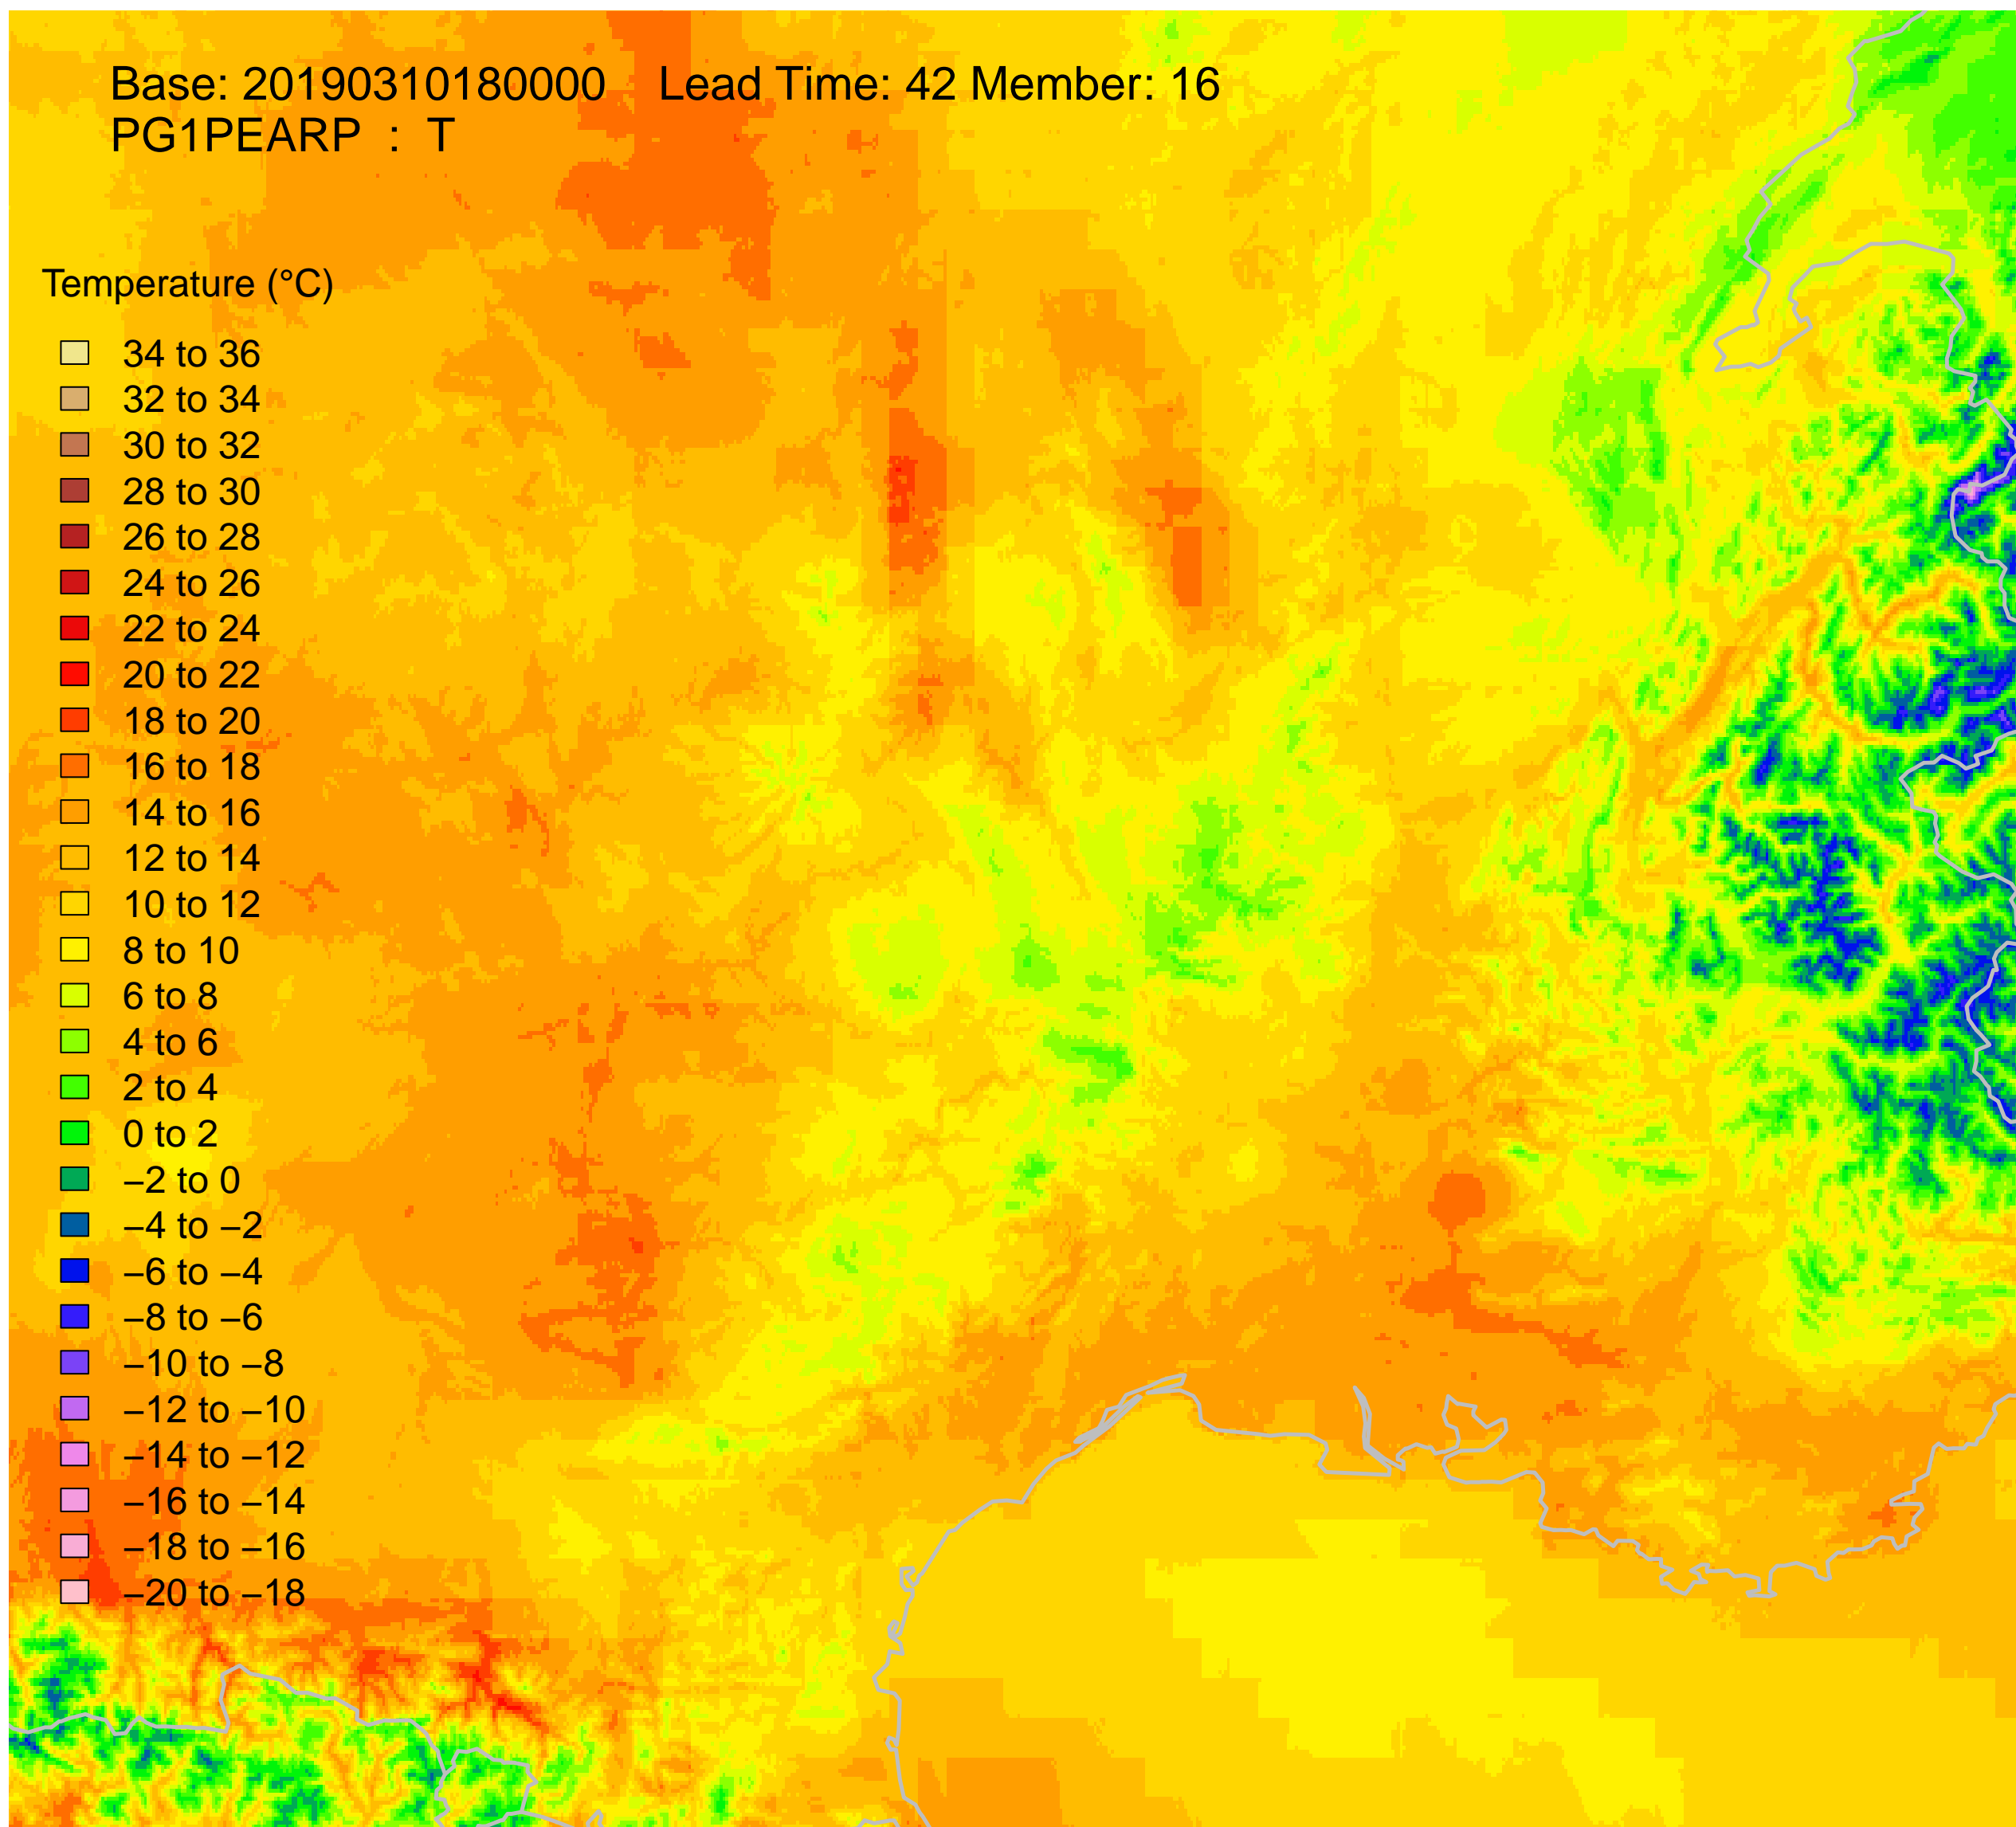

Supplement: Supplementary file 1 [file npg-27-329-2020-supplement.zip › fig8.pdf]

time-averaged CRPS boxplot RR24 10/19

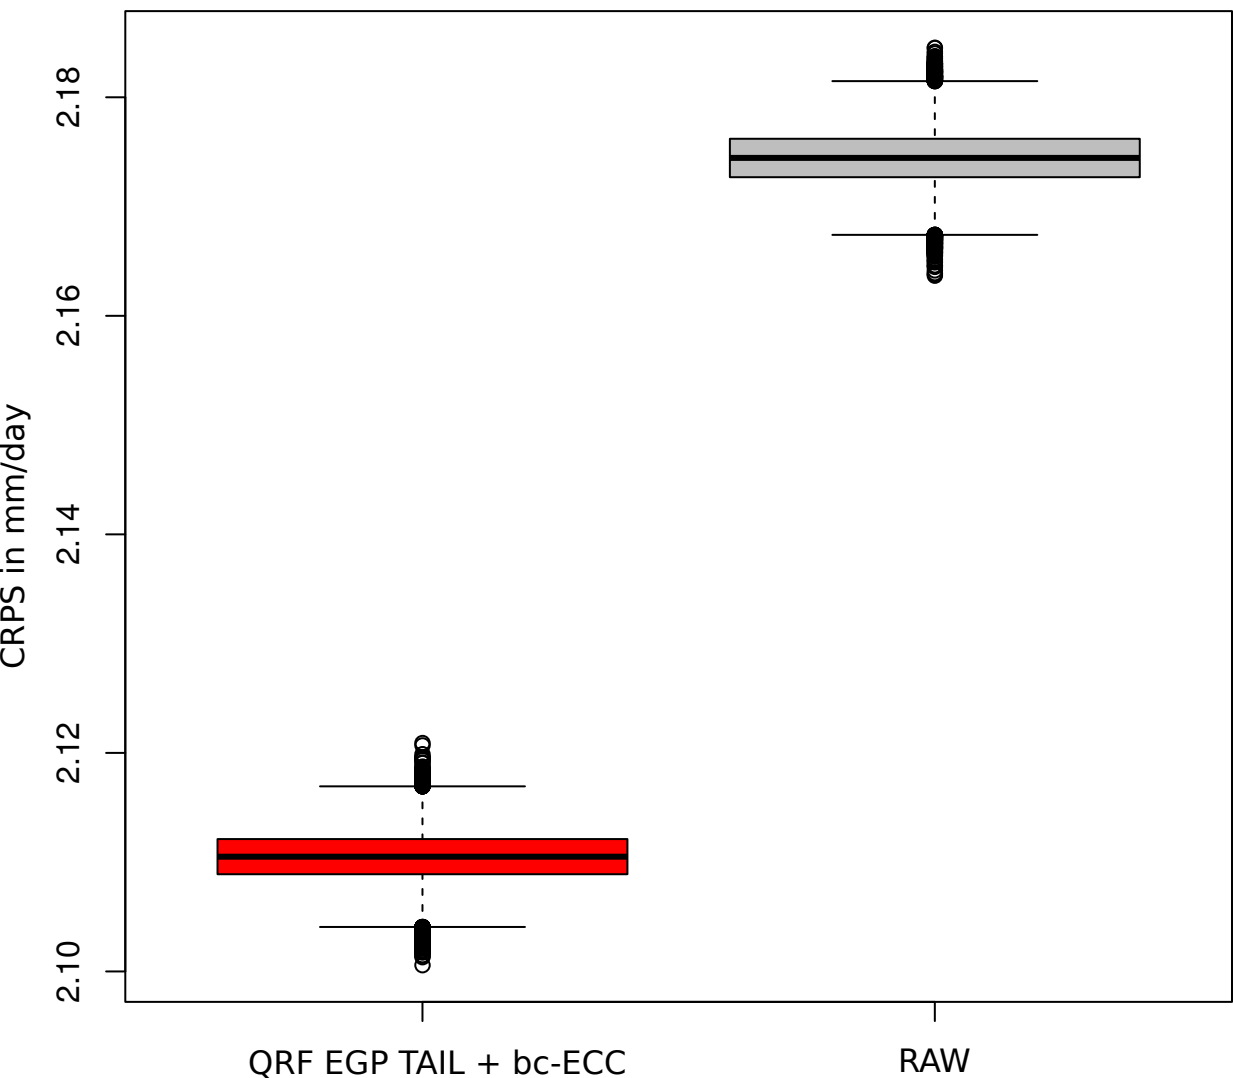

Supplement: Supplementary file 1 [file npg-27-329-2020-supplement.zip › crps24.pdf]

# T2m CRPS on EURW1S100 Stations

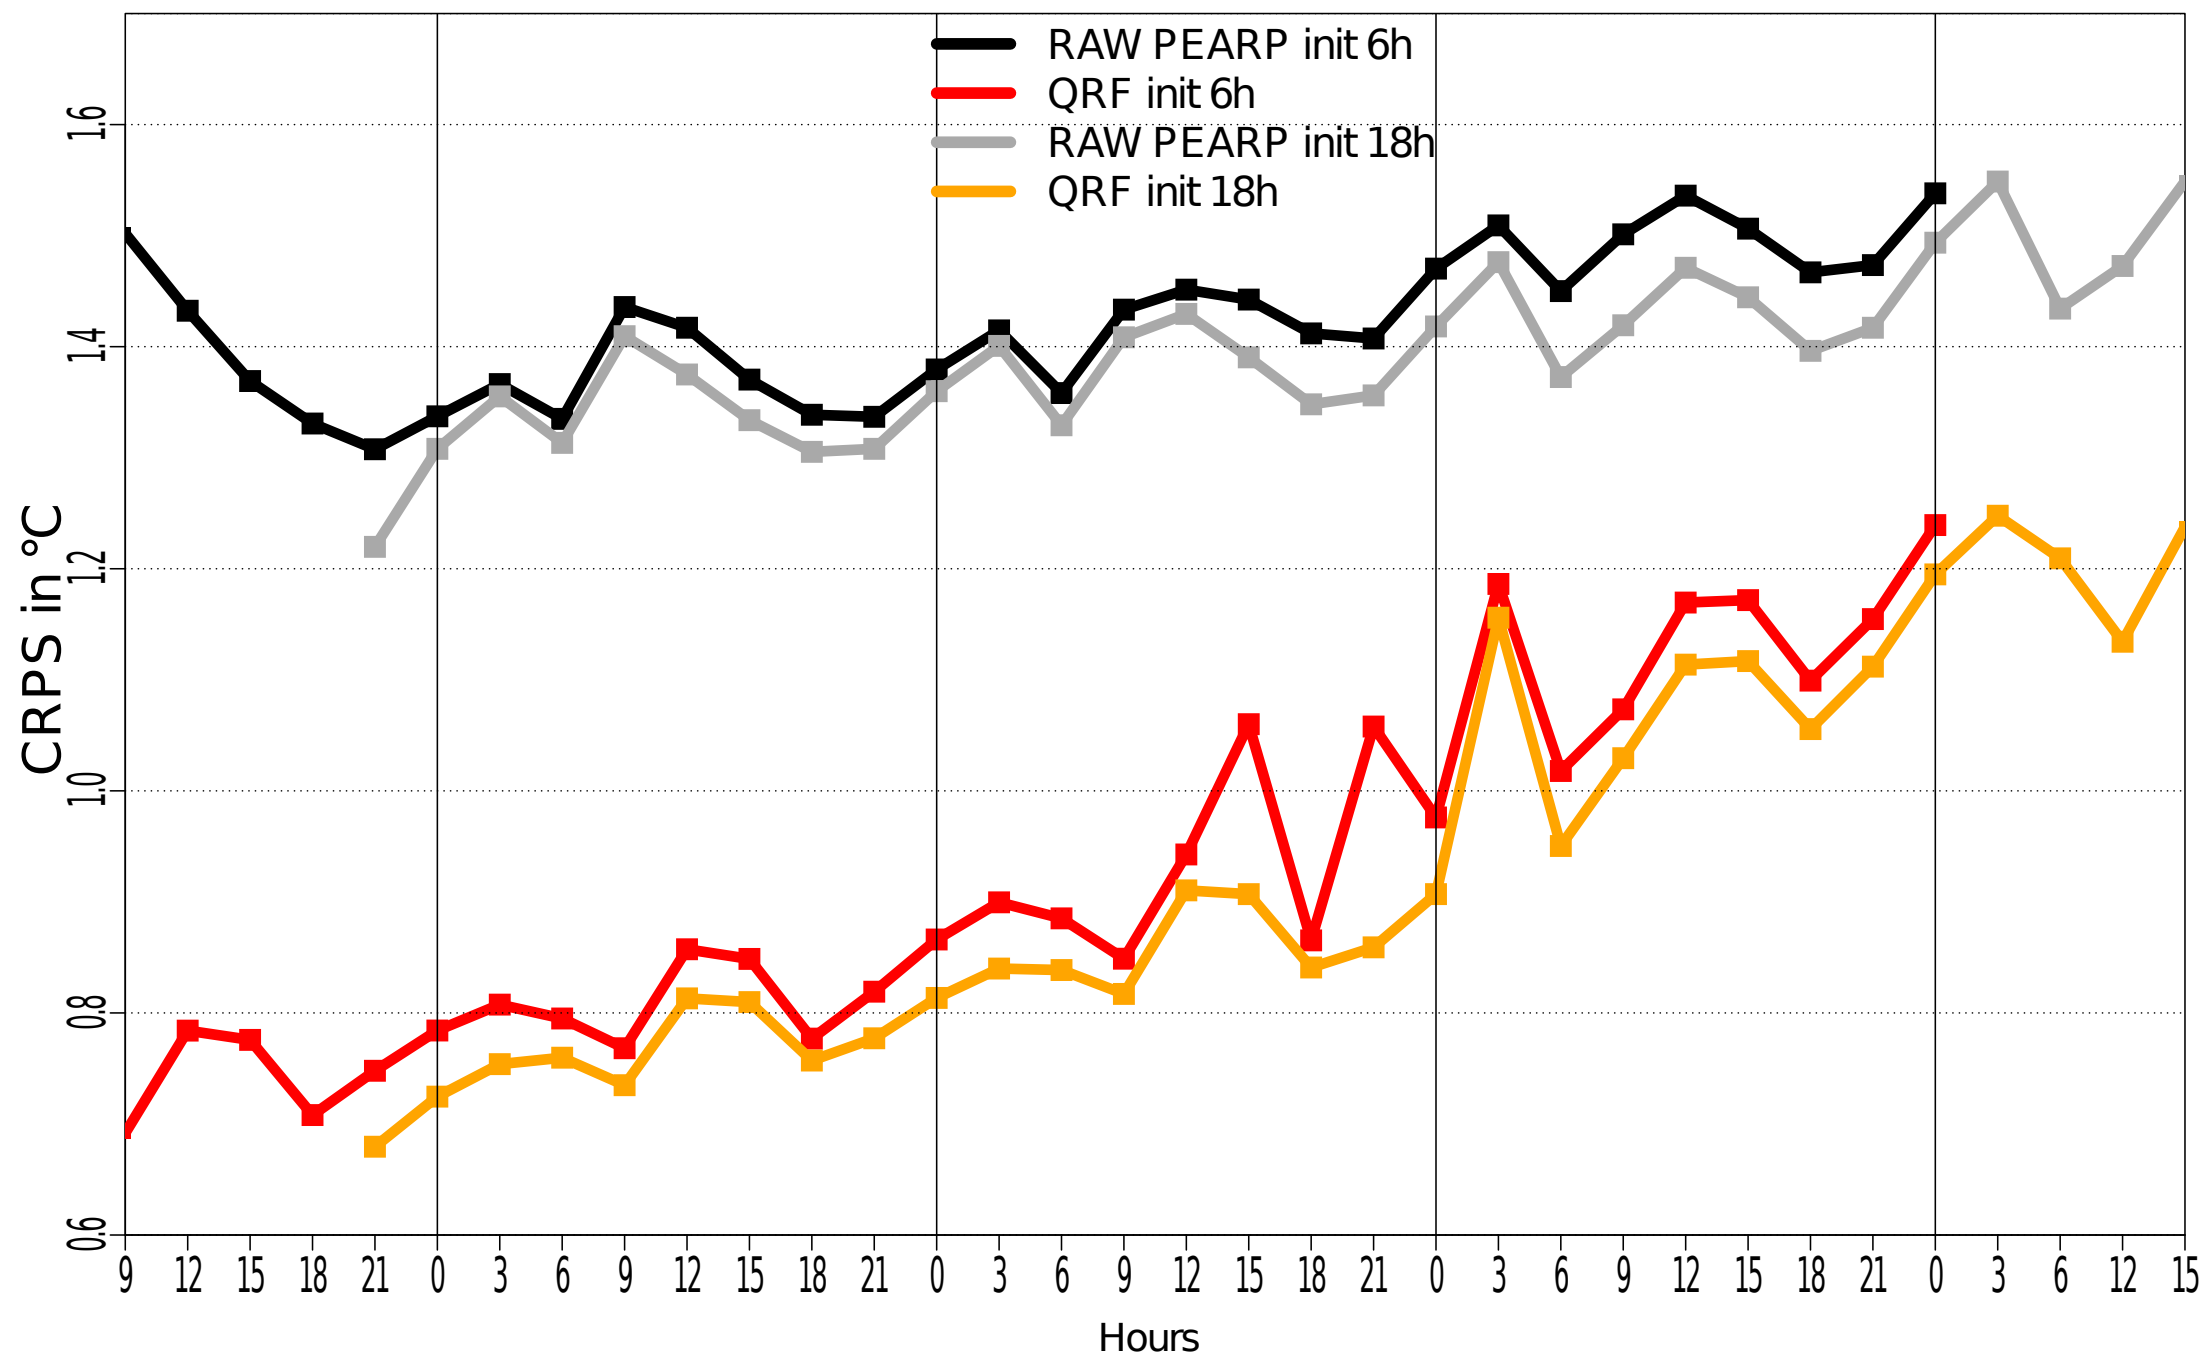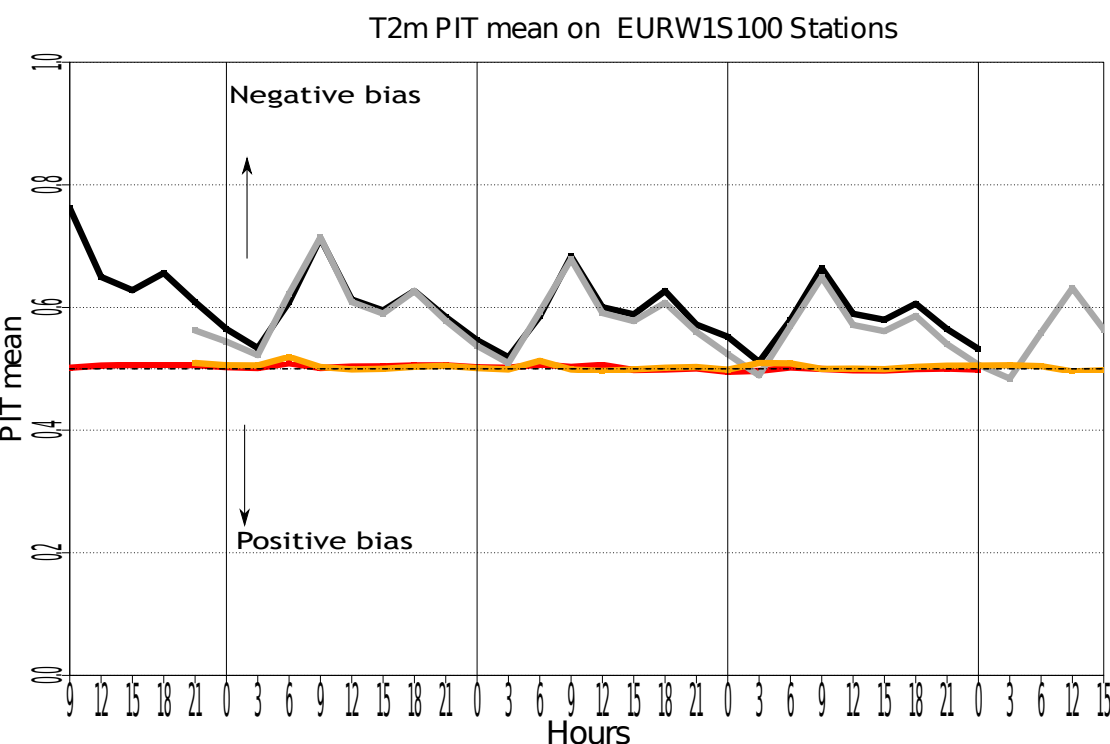

Supplement: Supplementary file 1 [file npg-27-329-2020-supplement.zip › scoret.pdf]

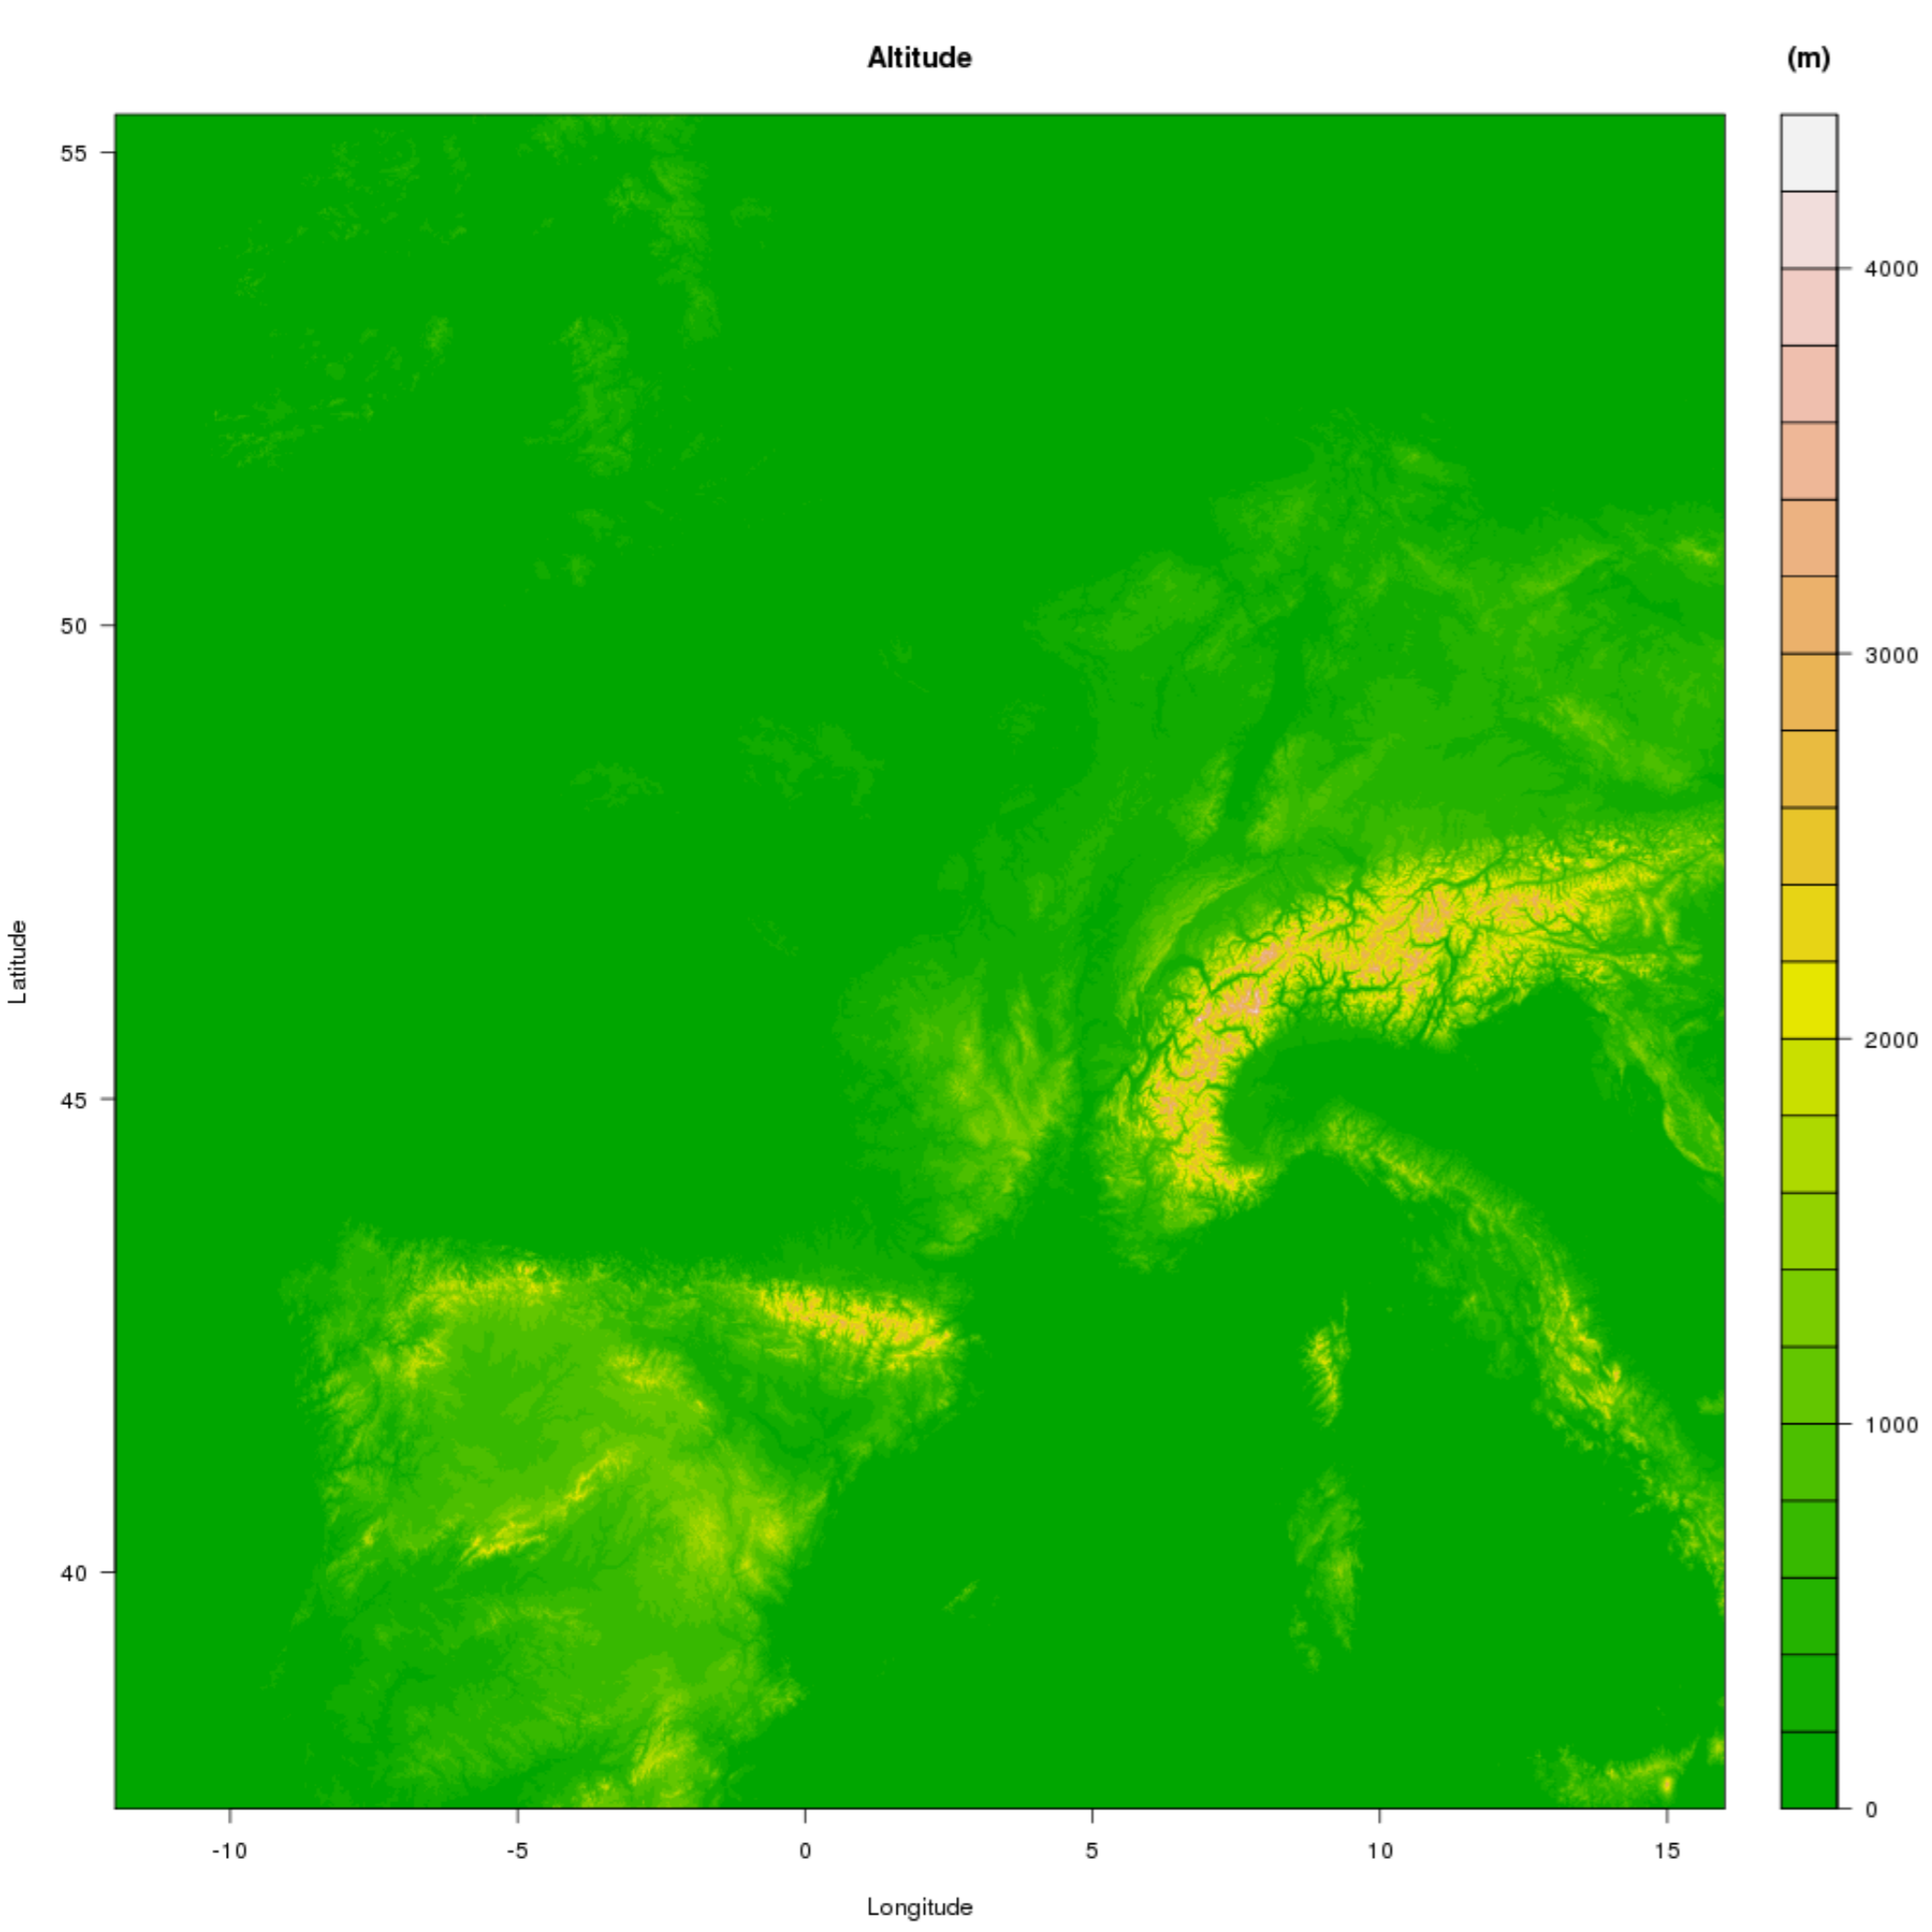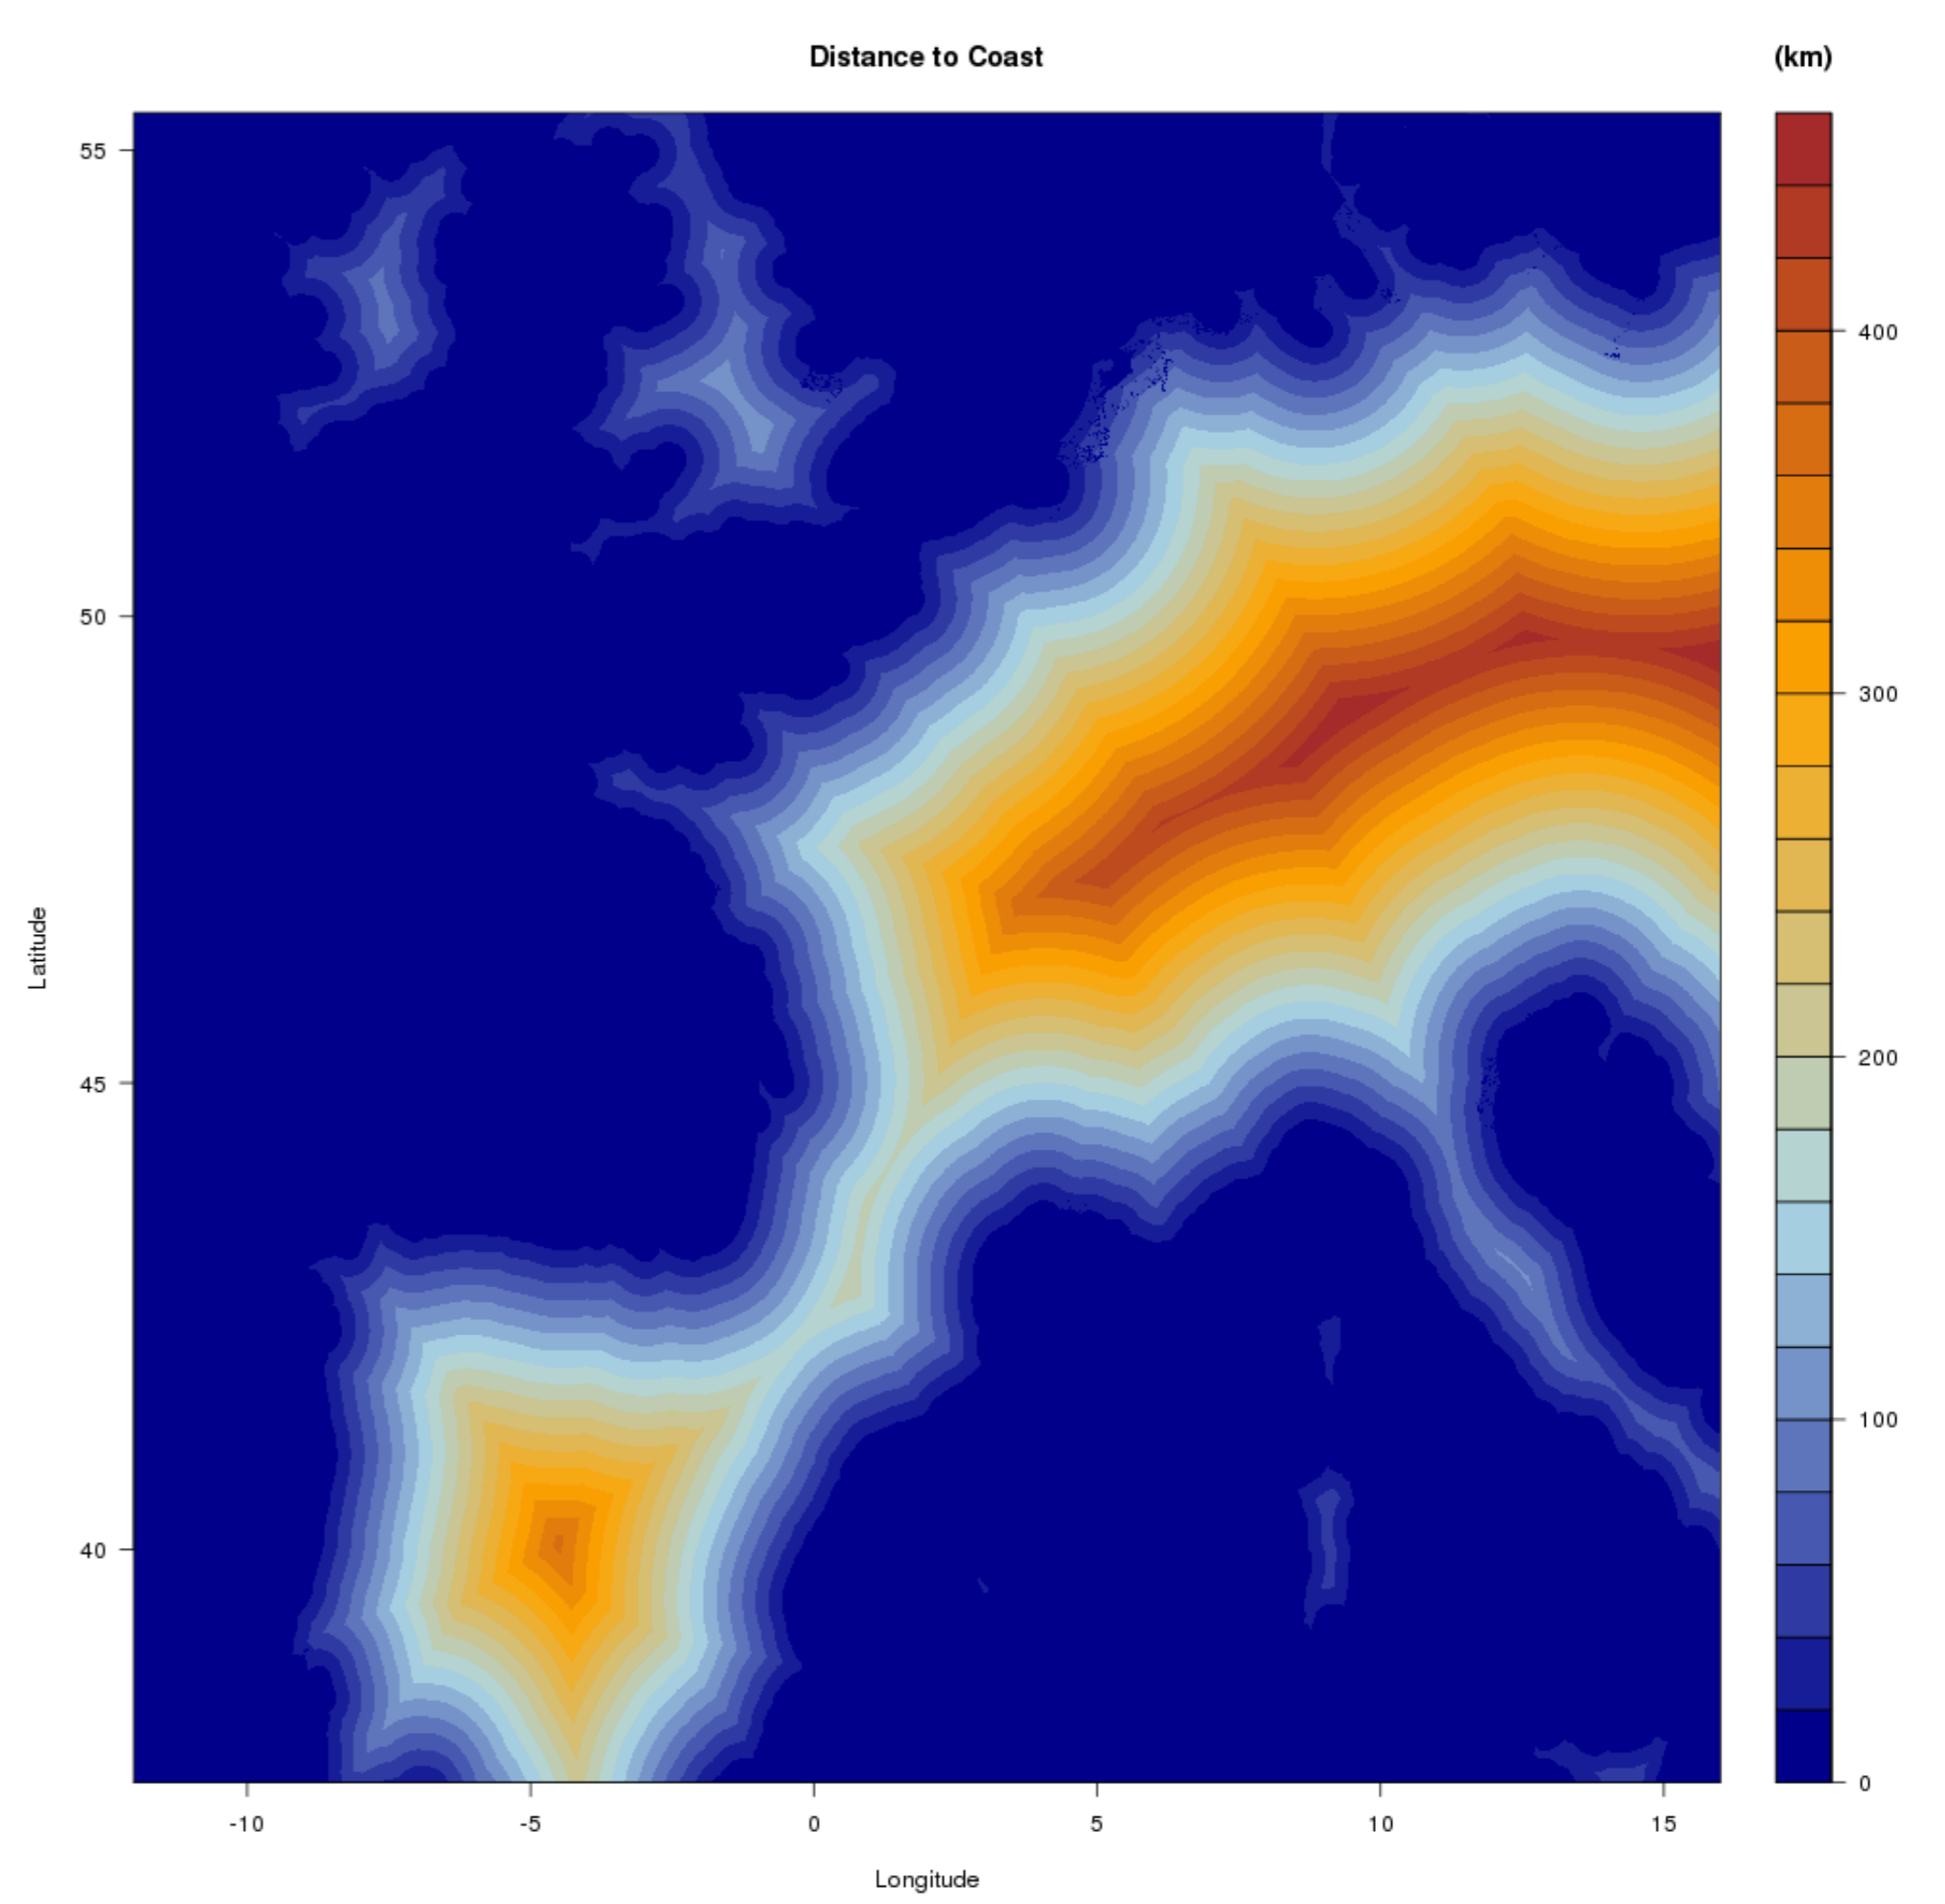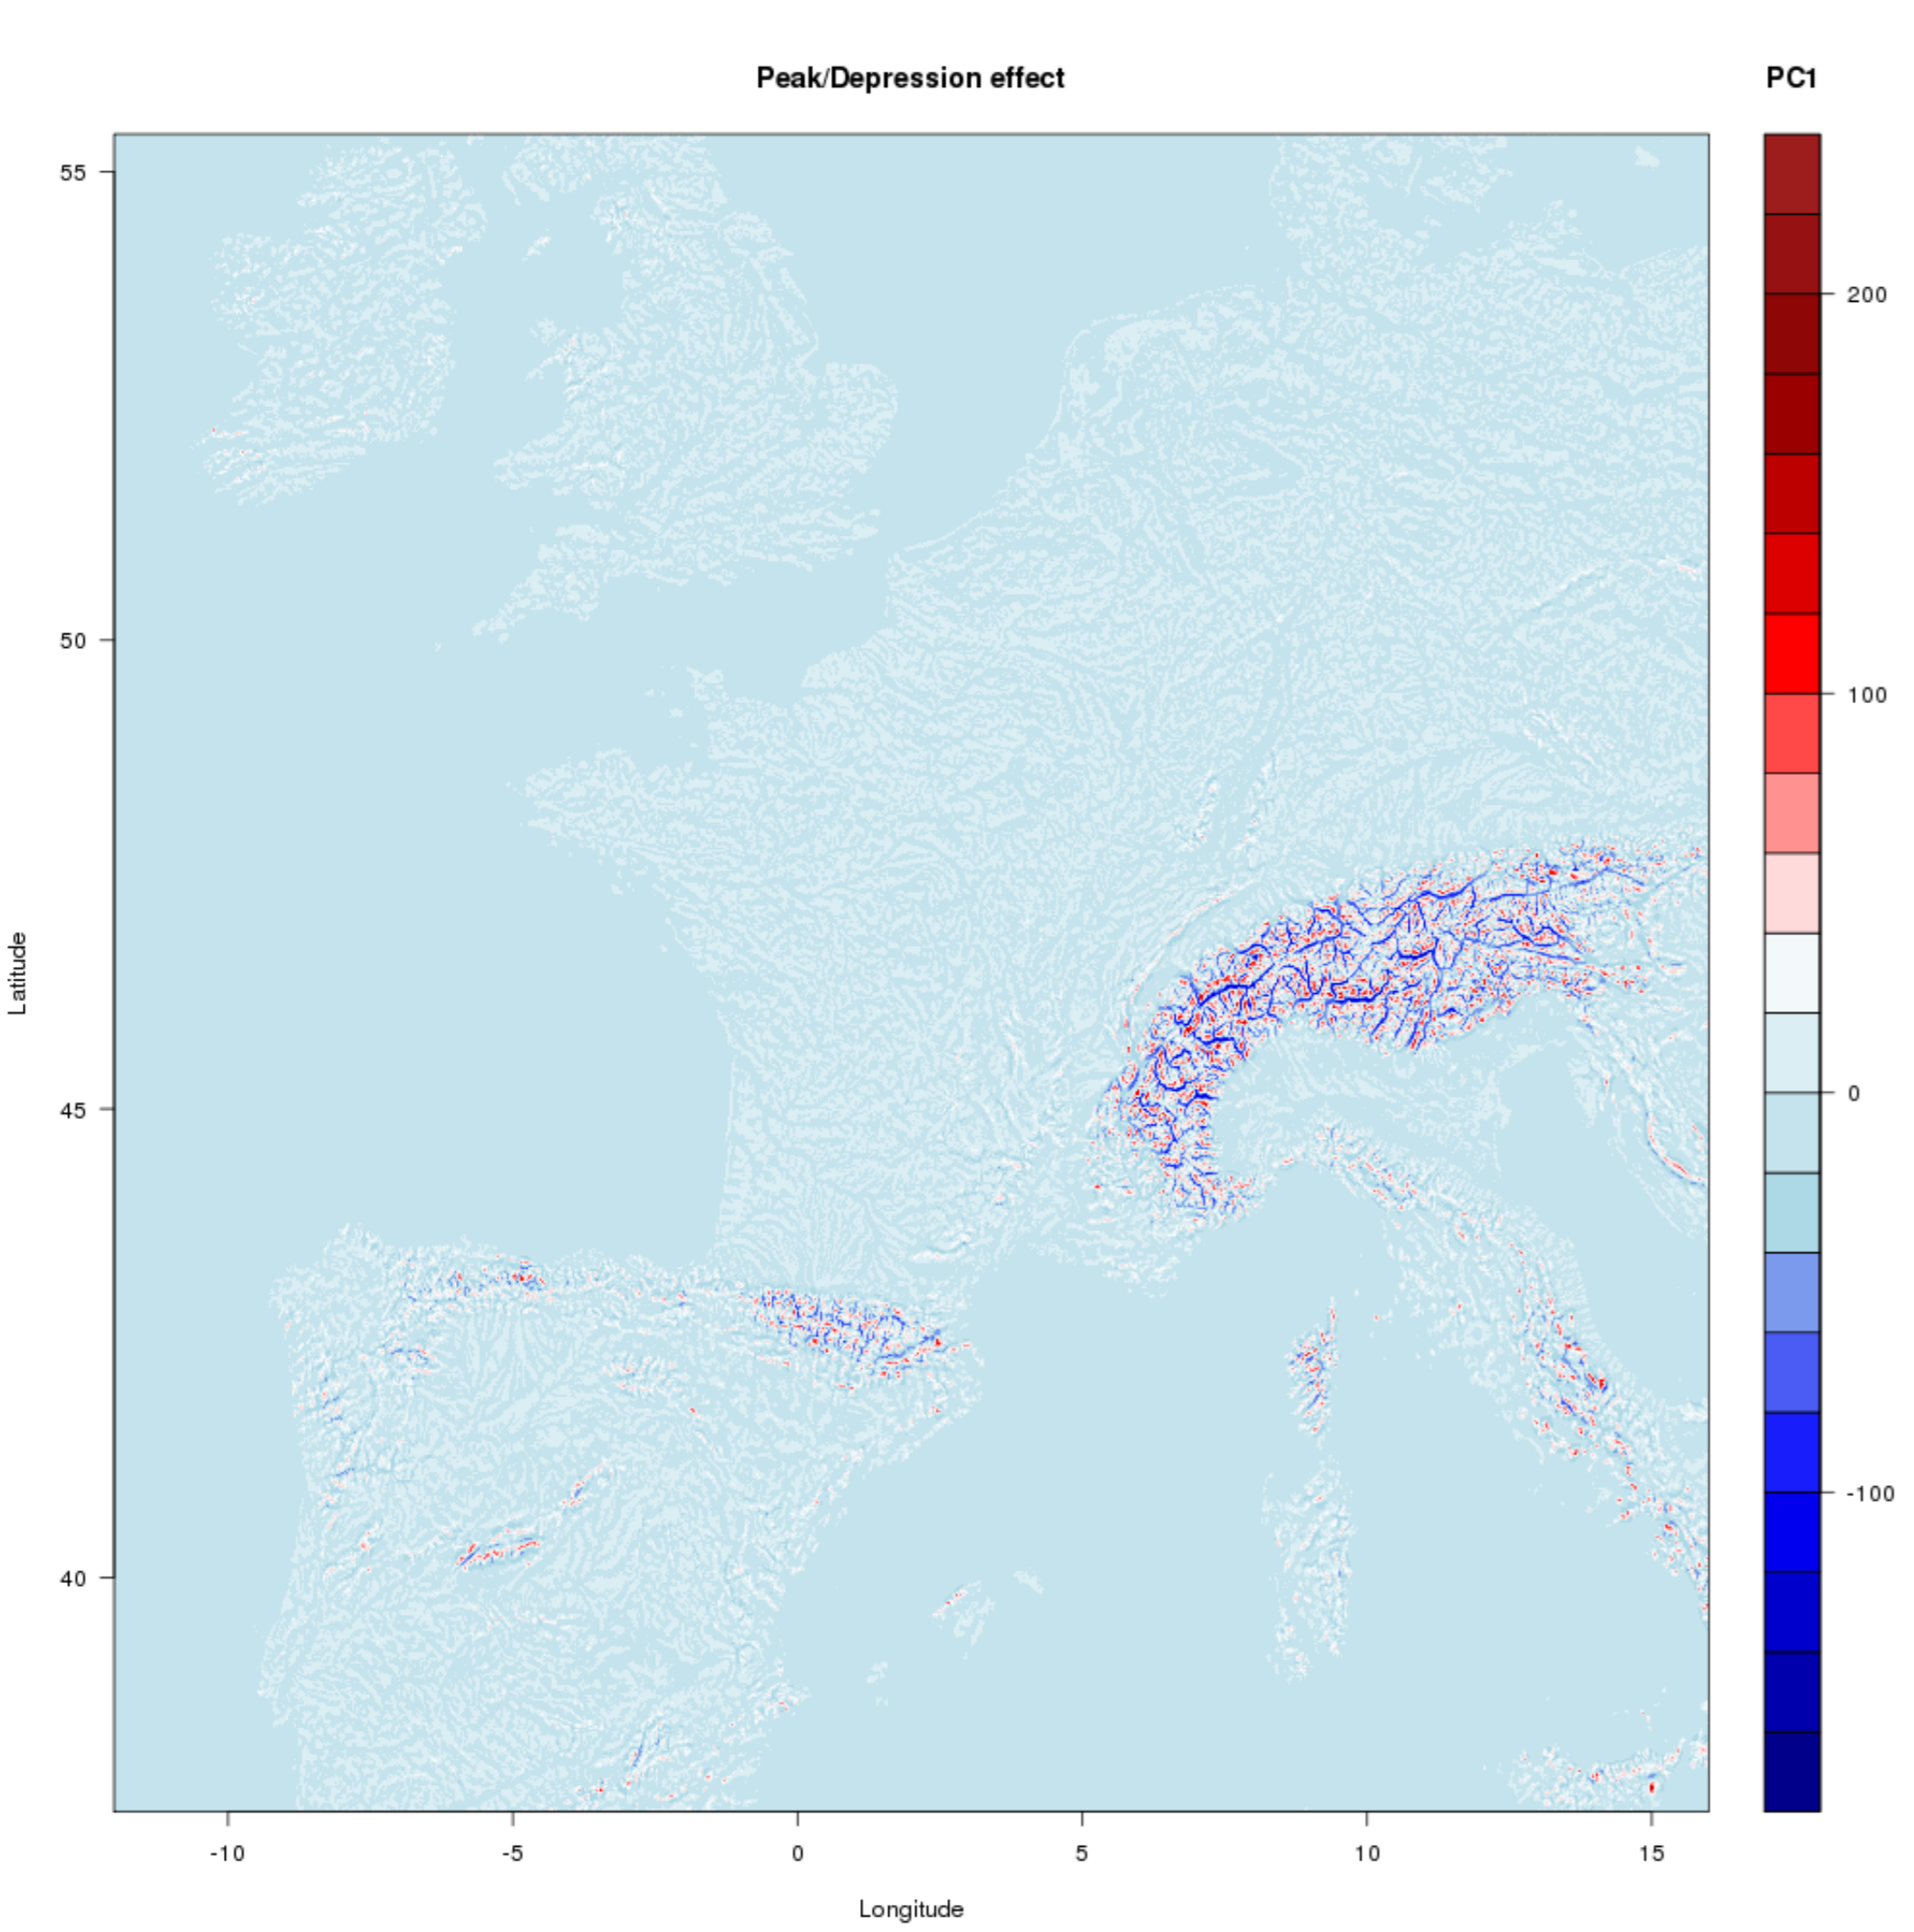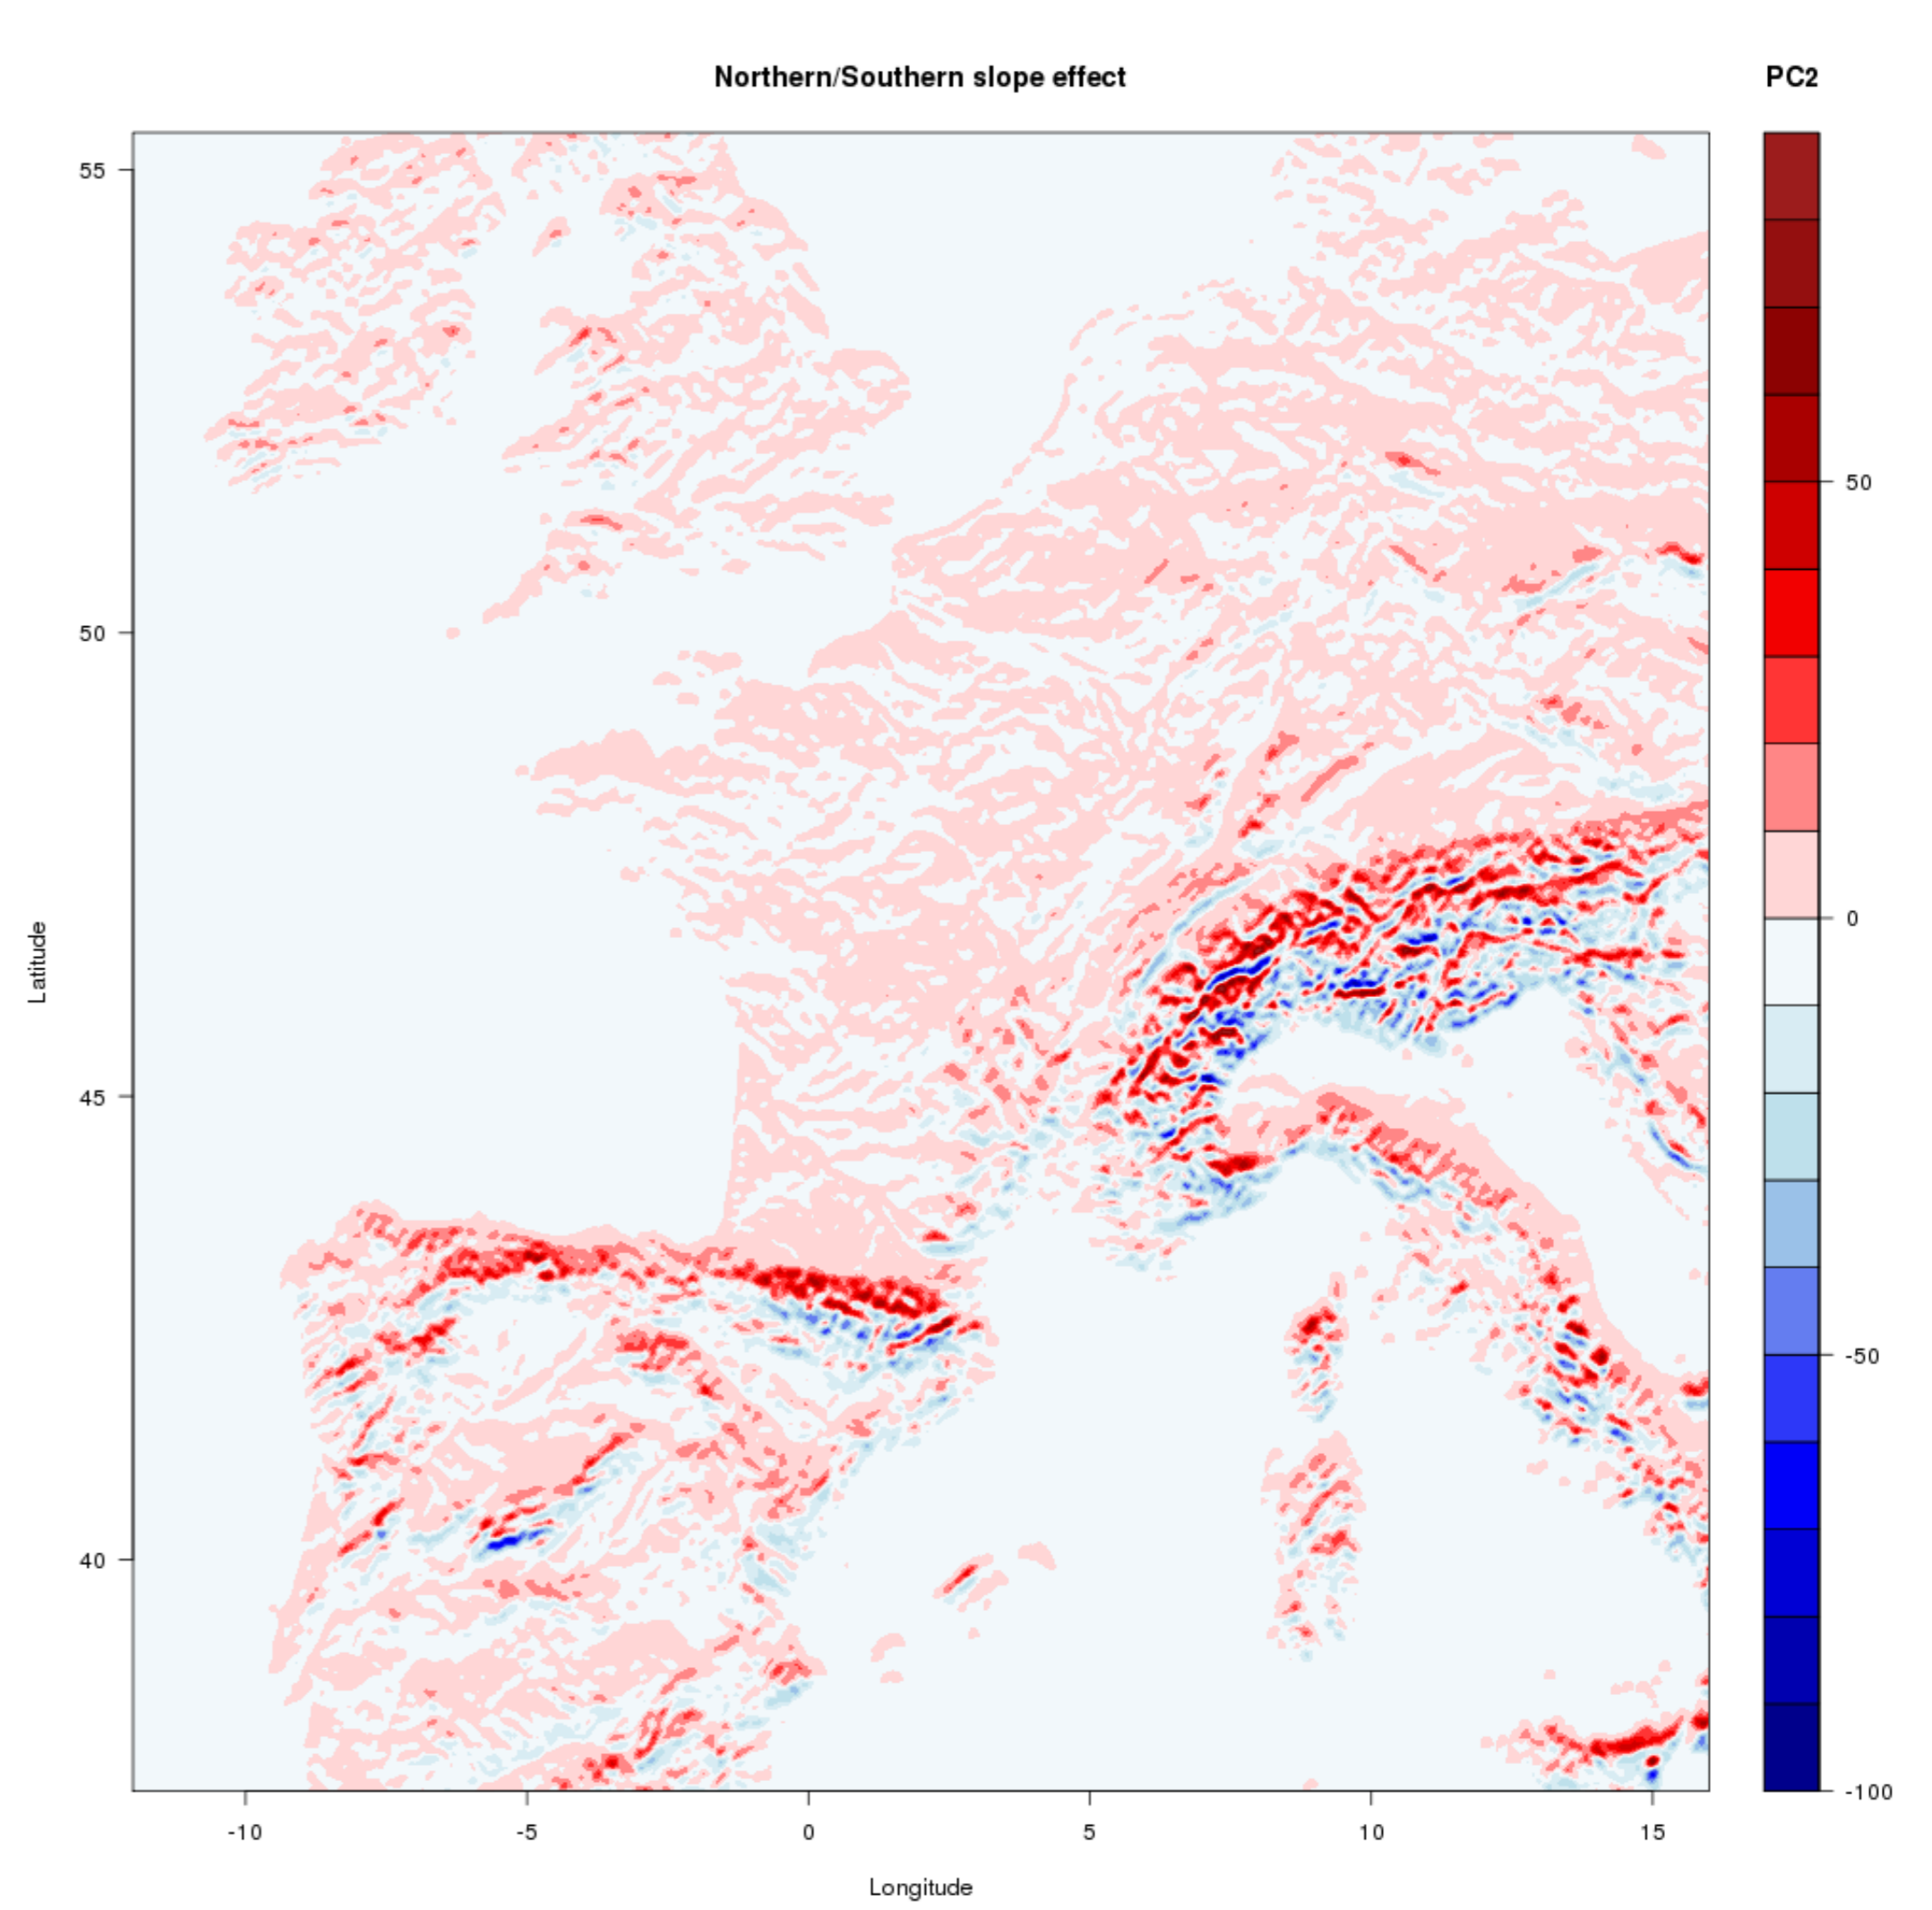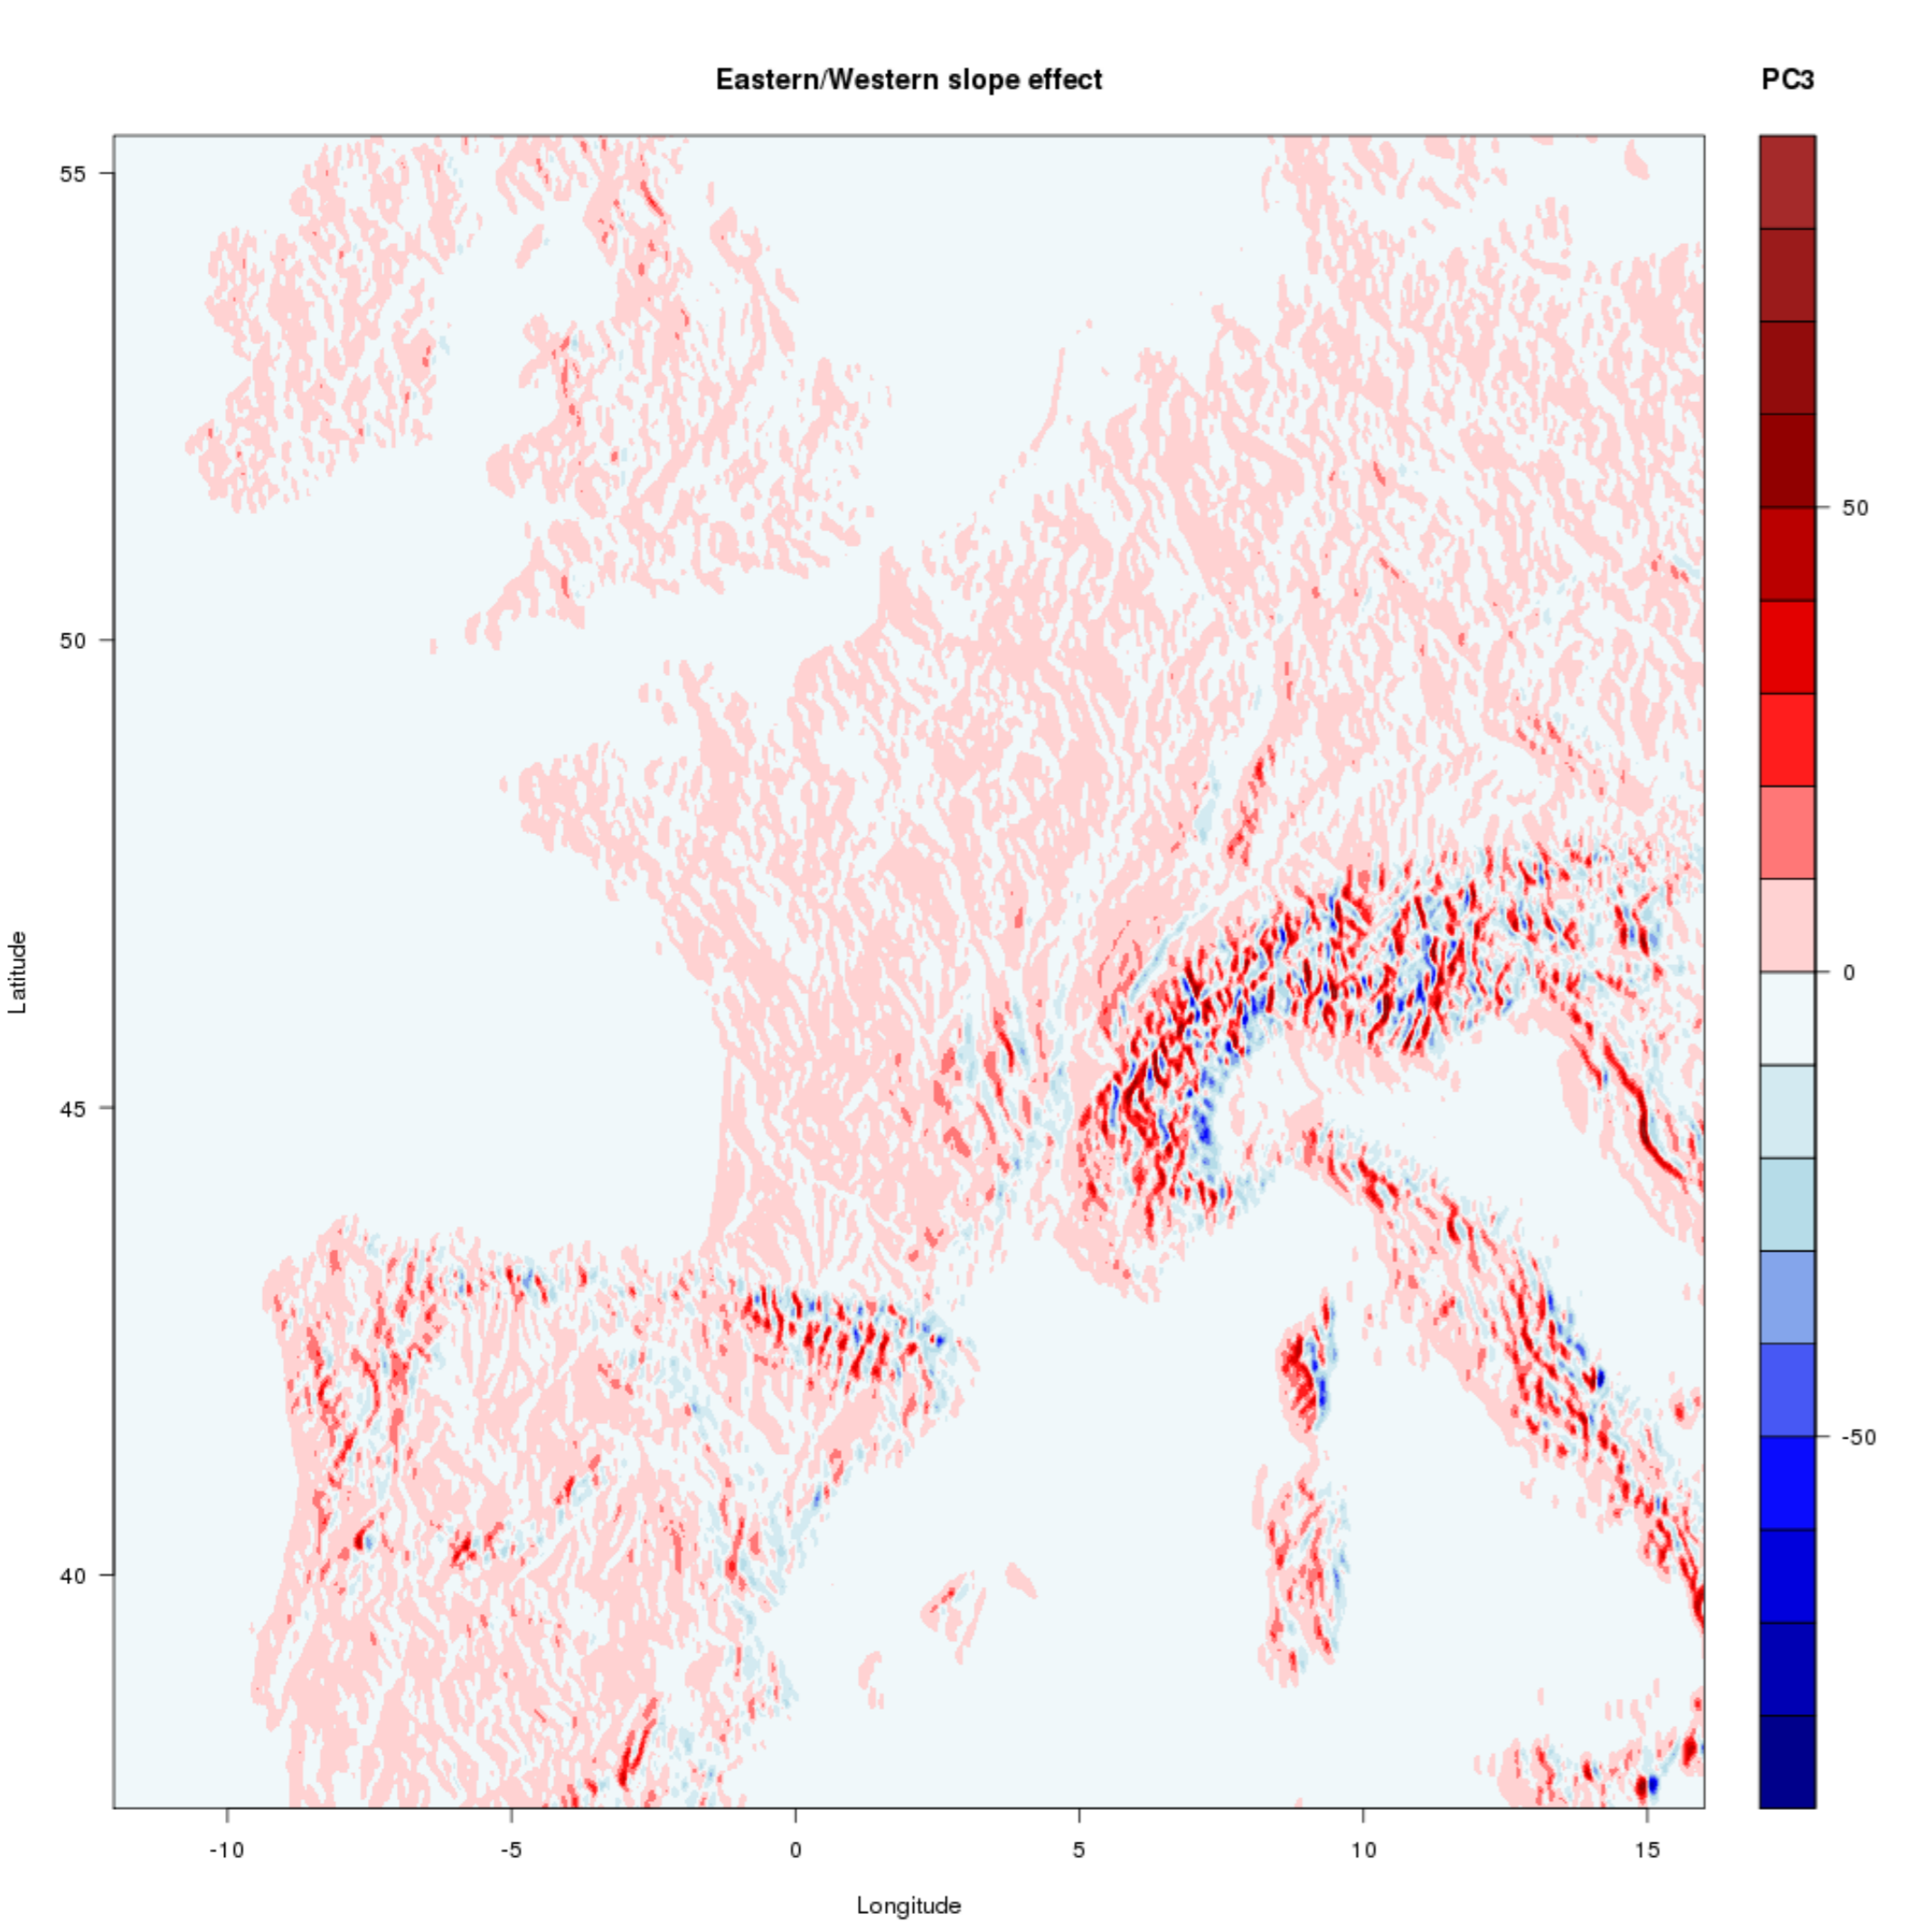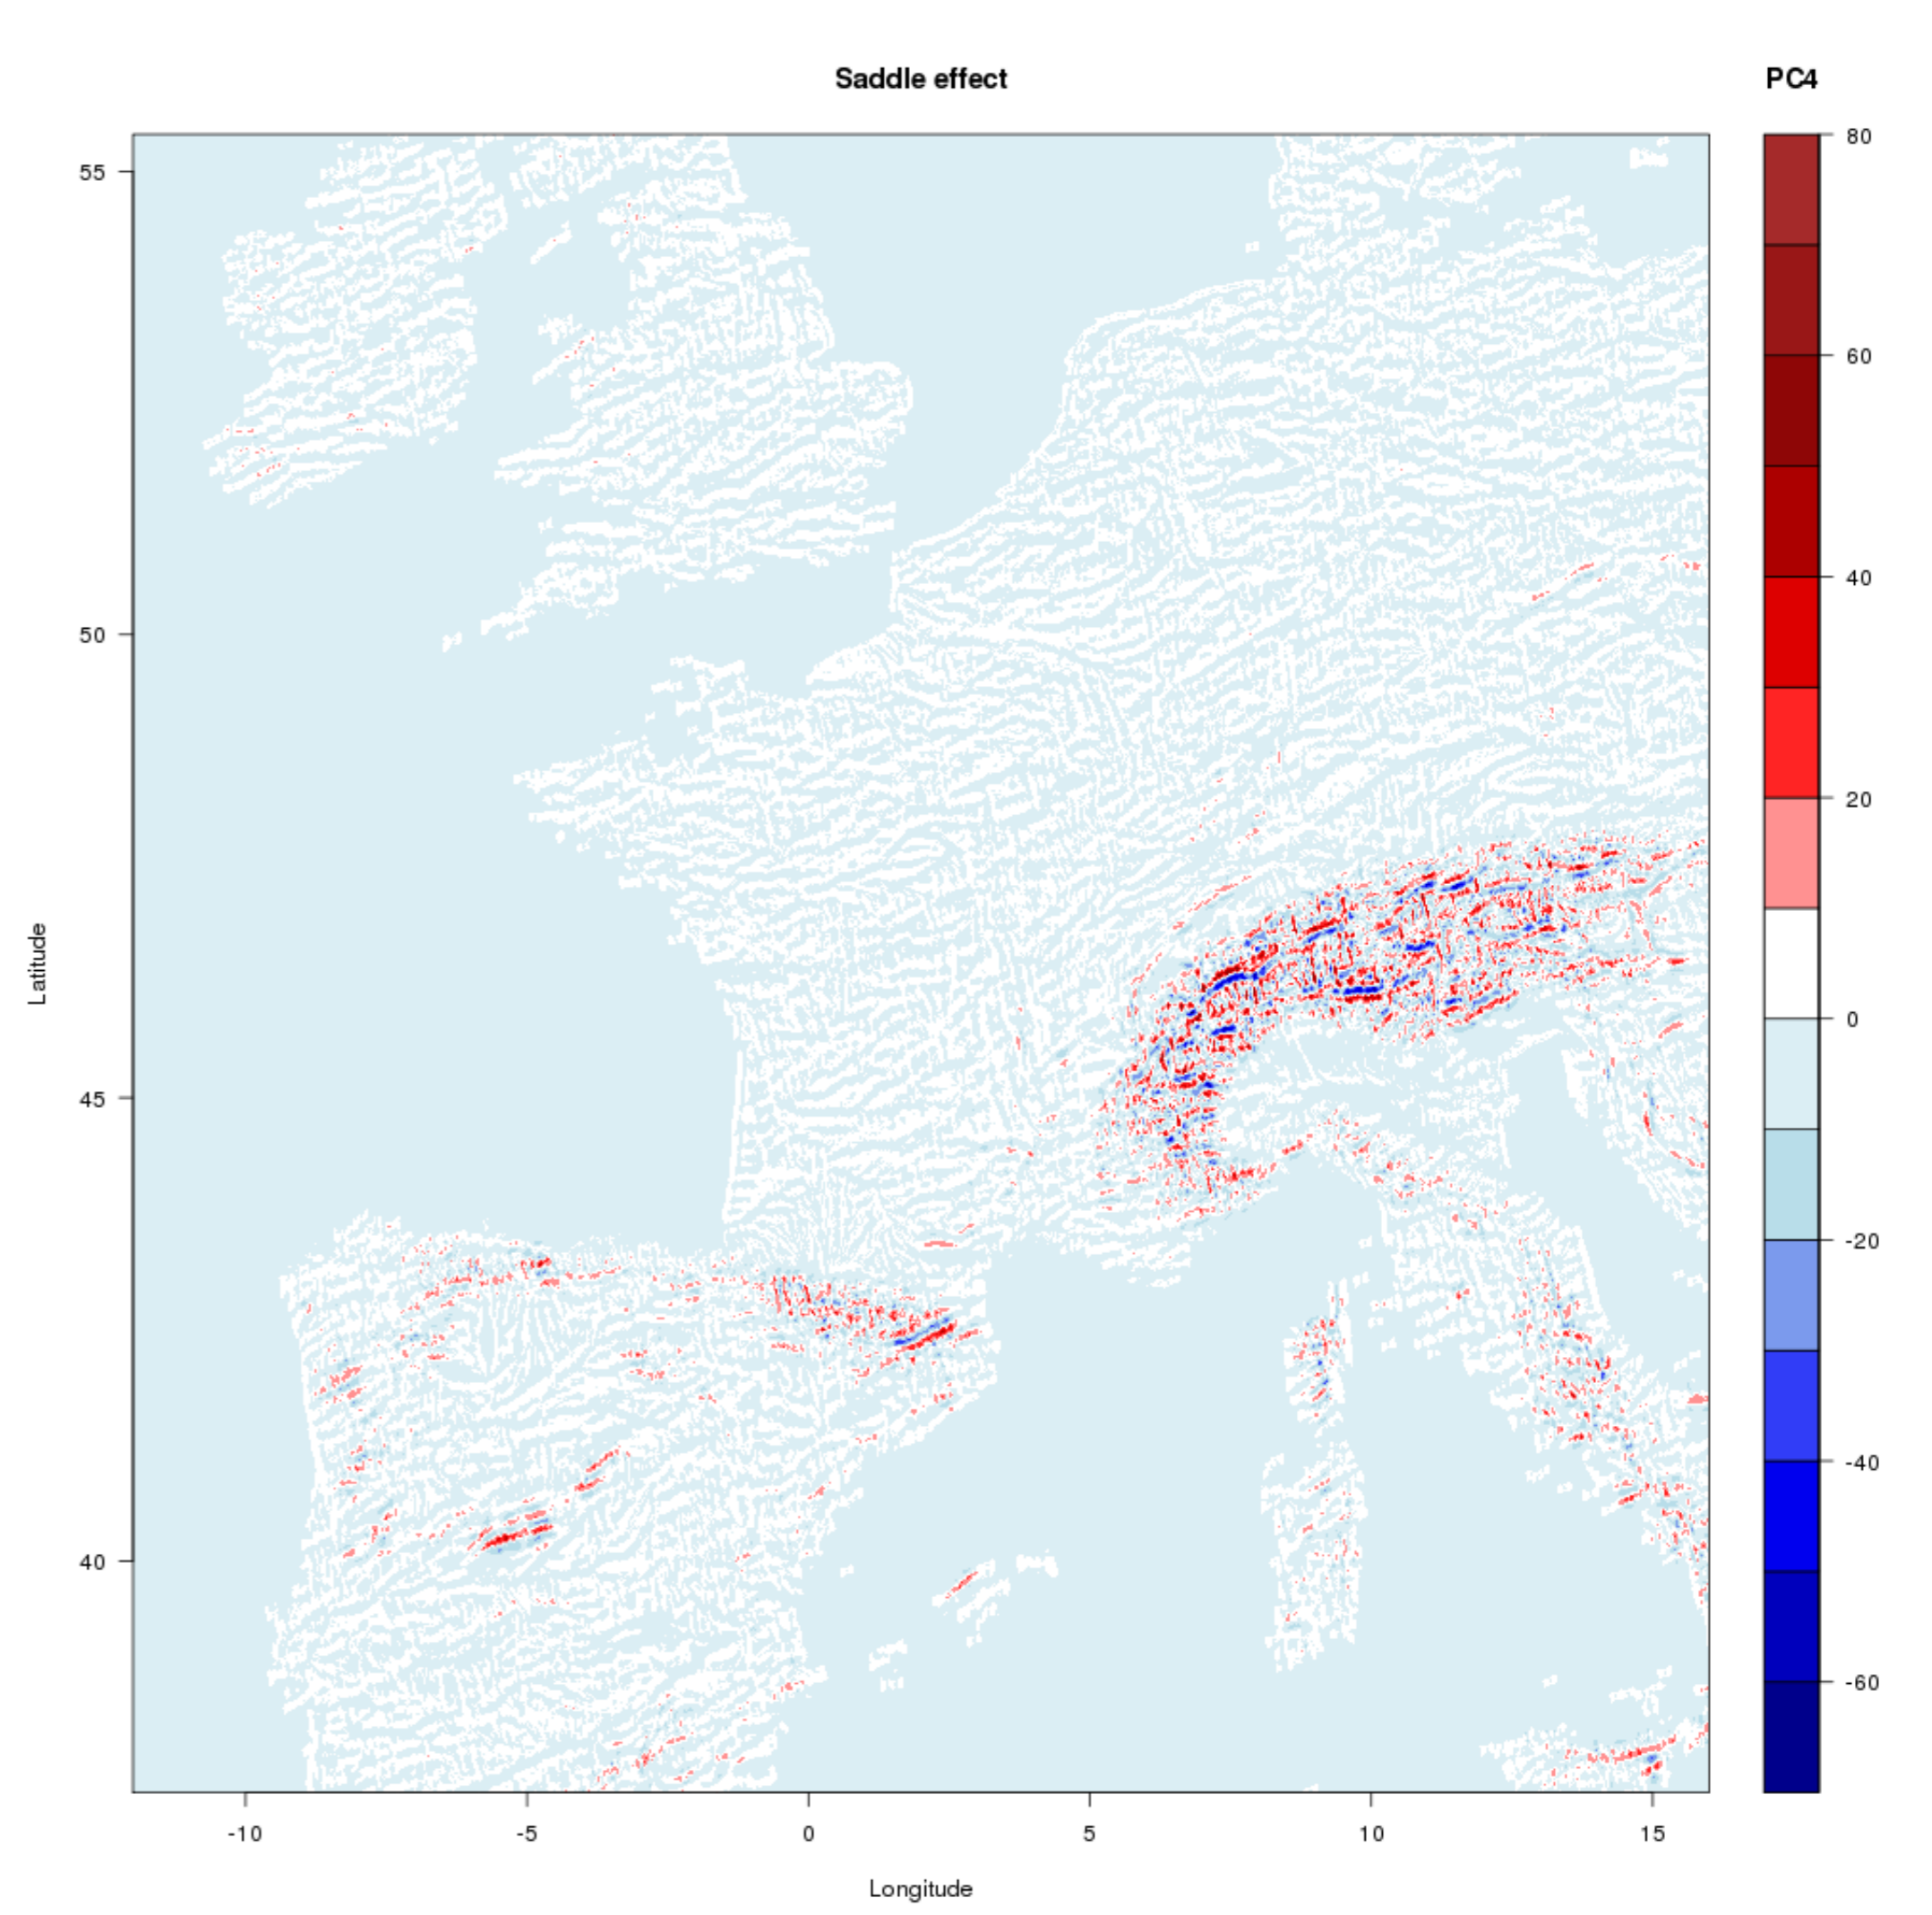

Supplement: Supplementary file 1 [file npg-27-329-2020-supplement.zip › aurelhy.pdf]

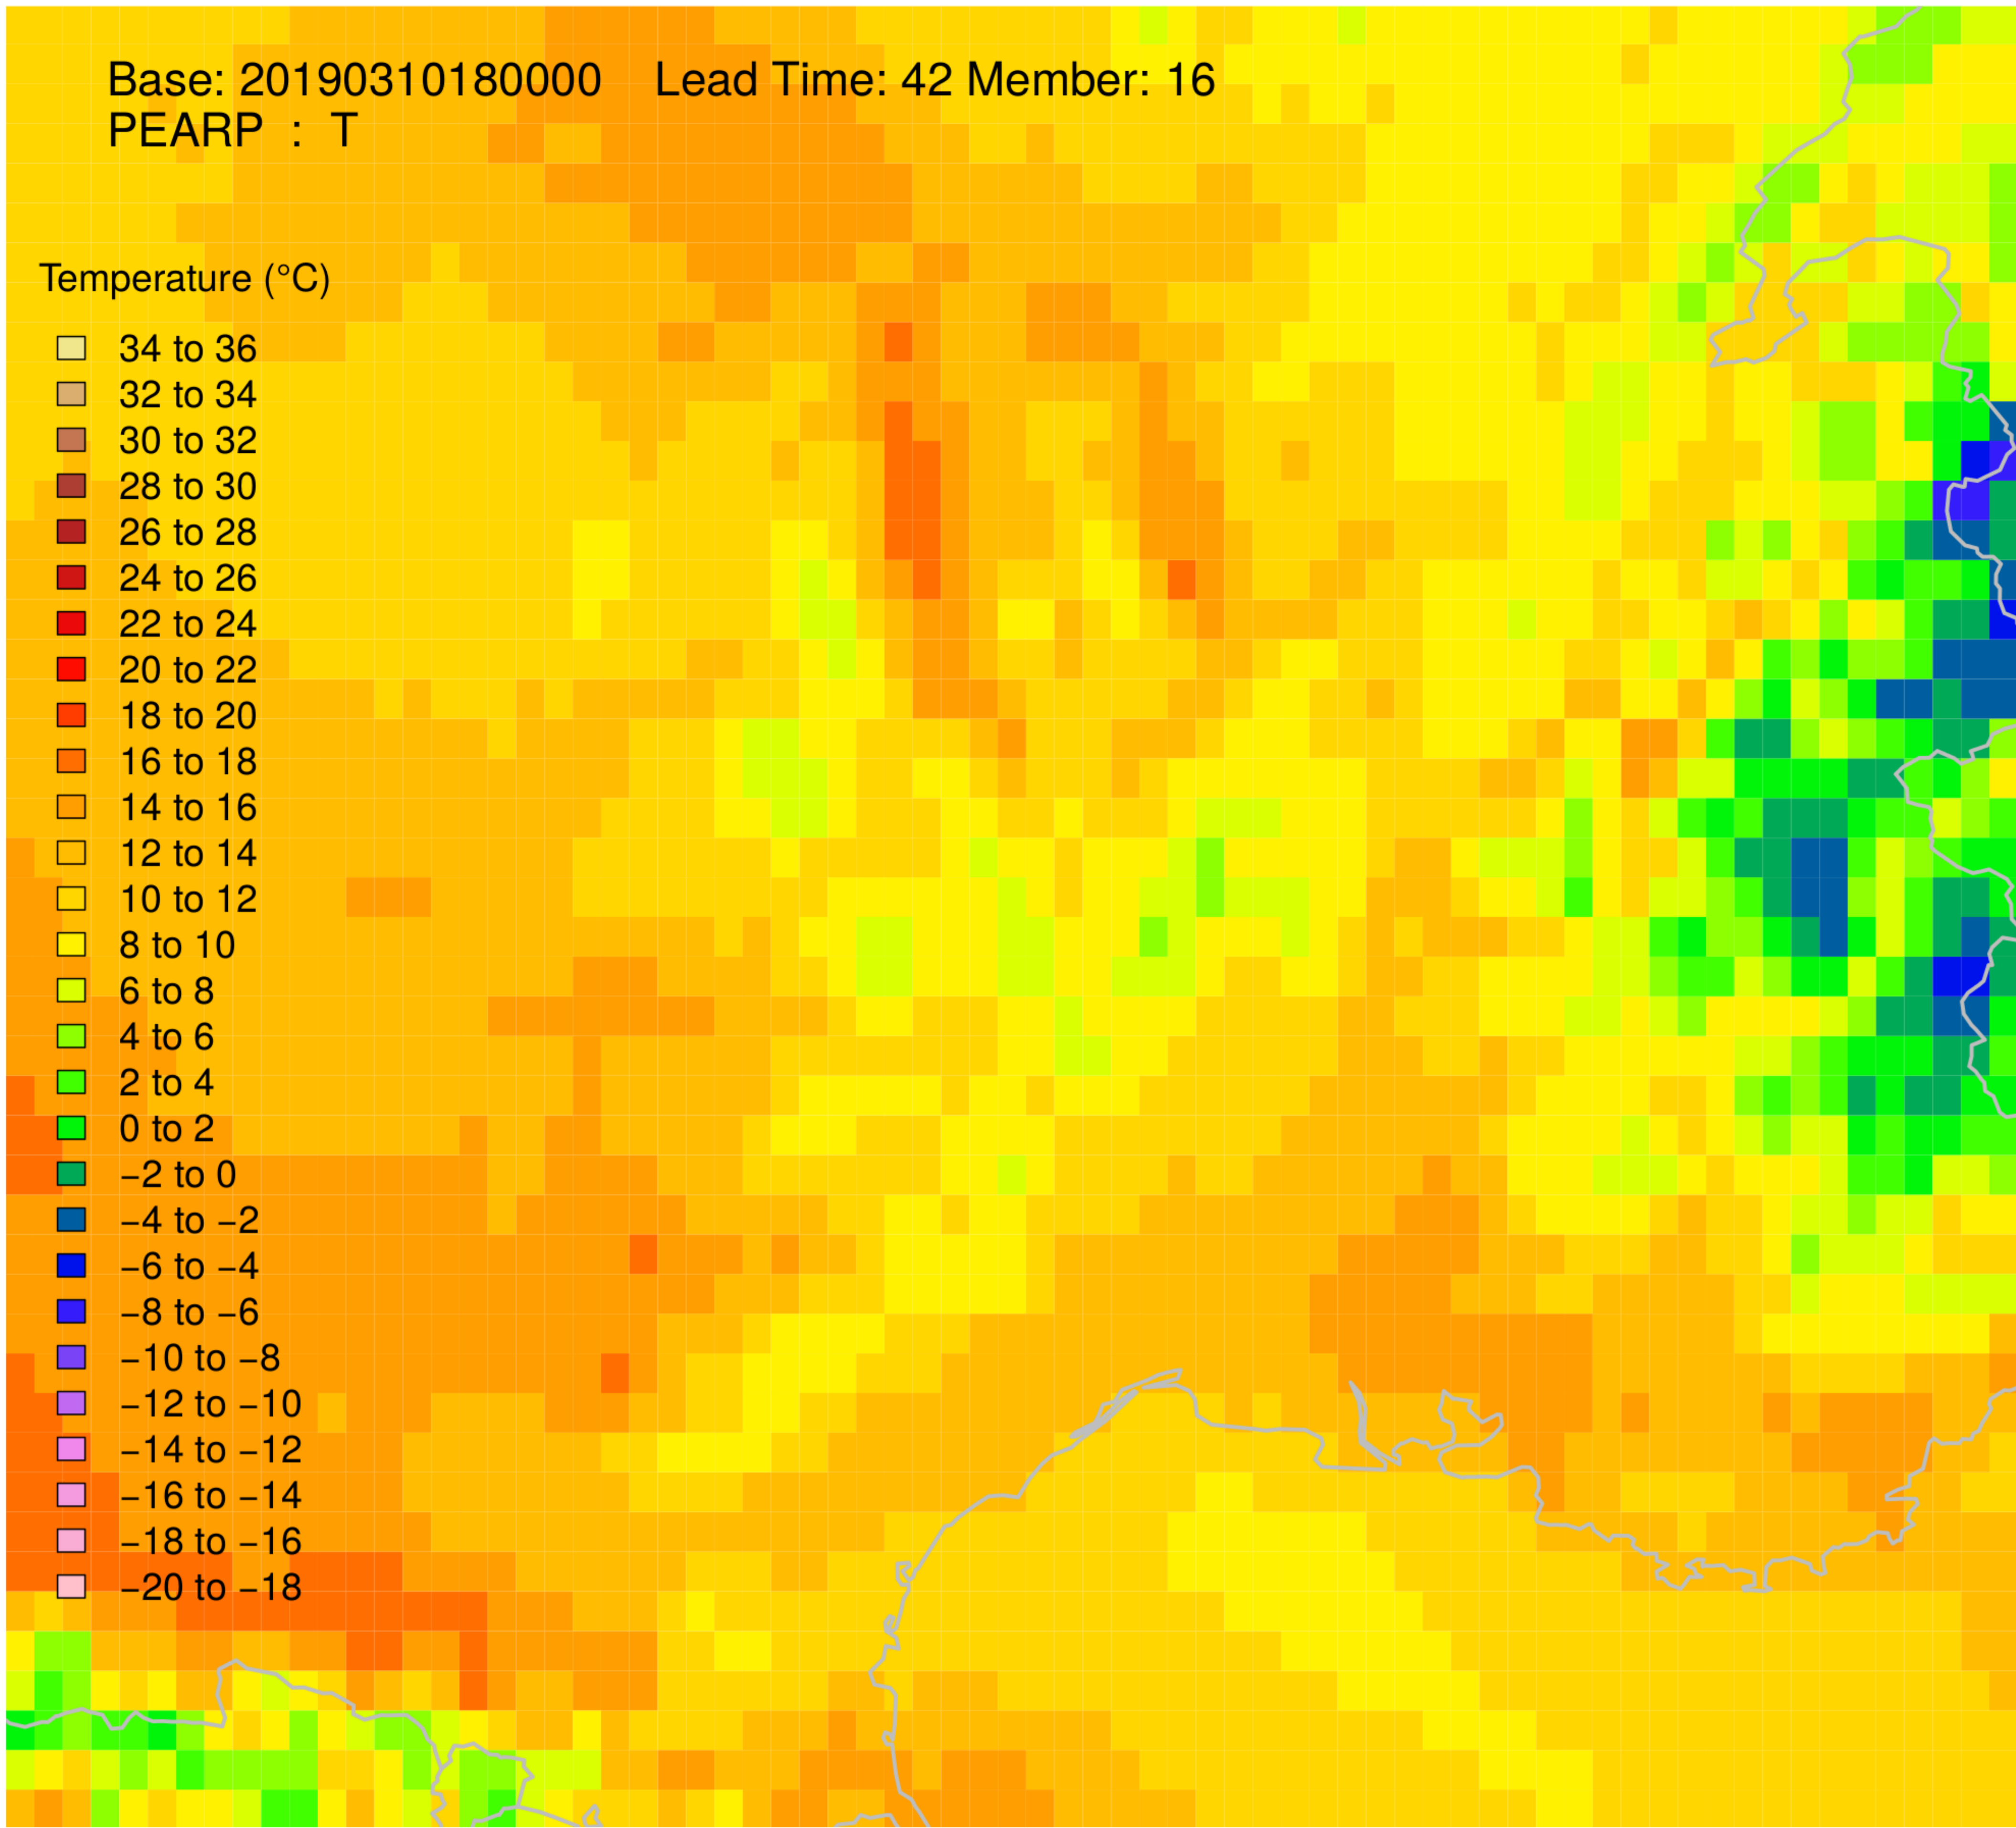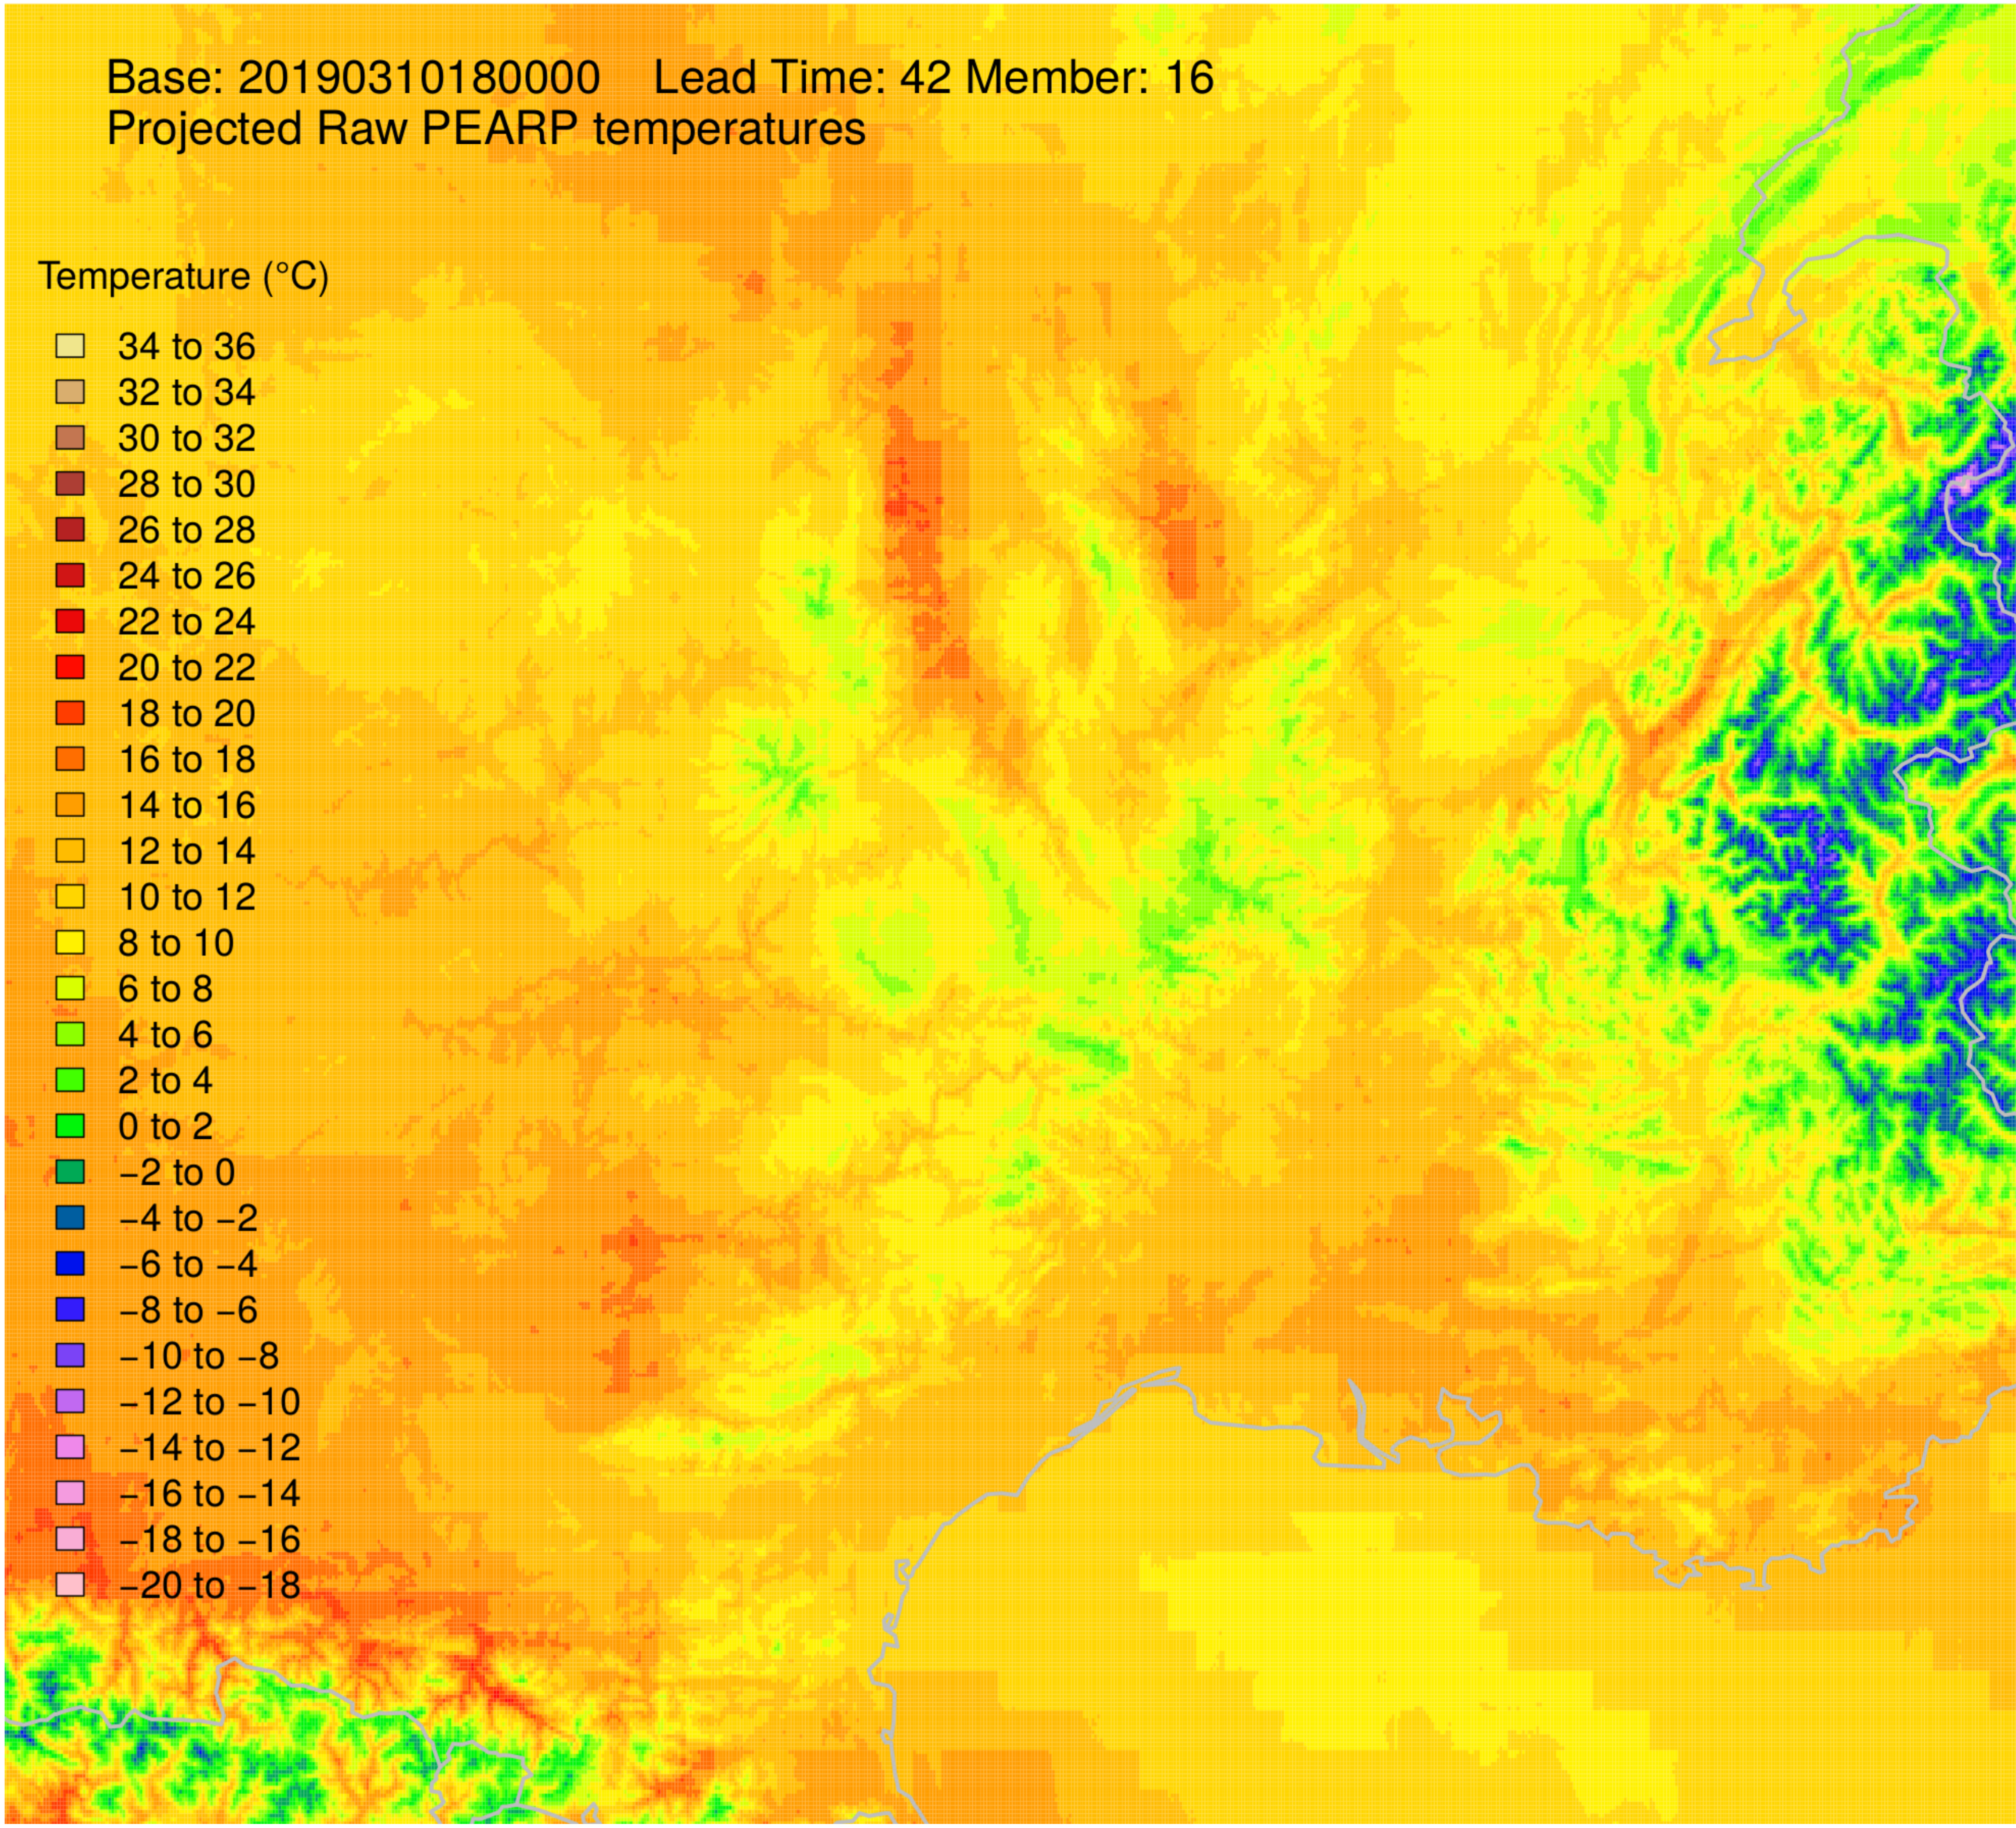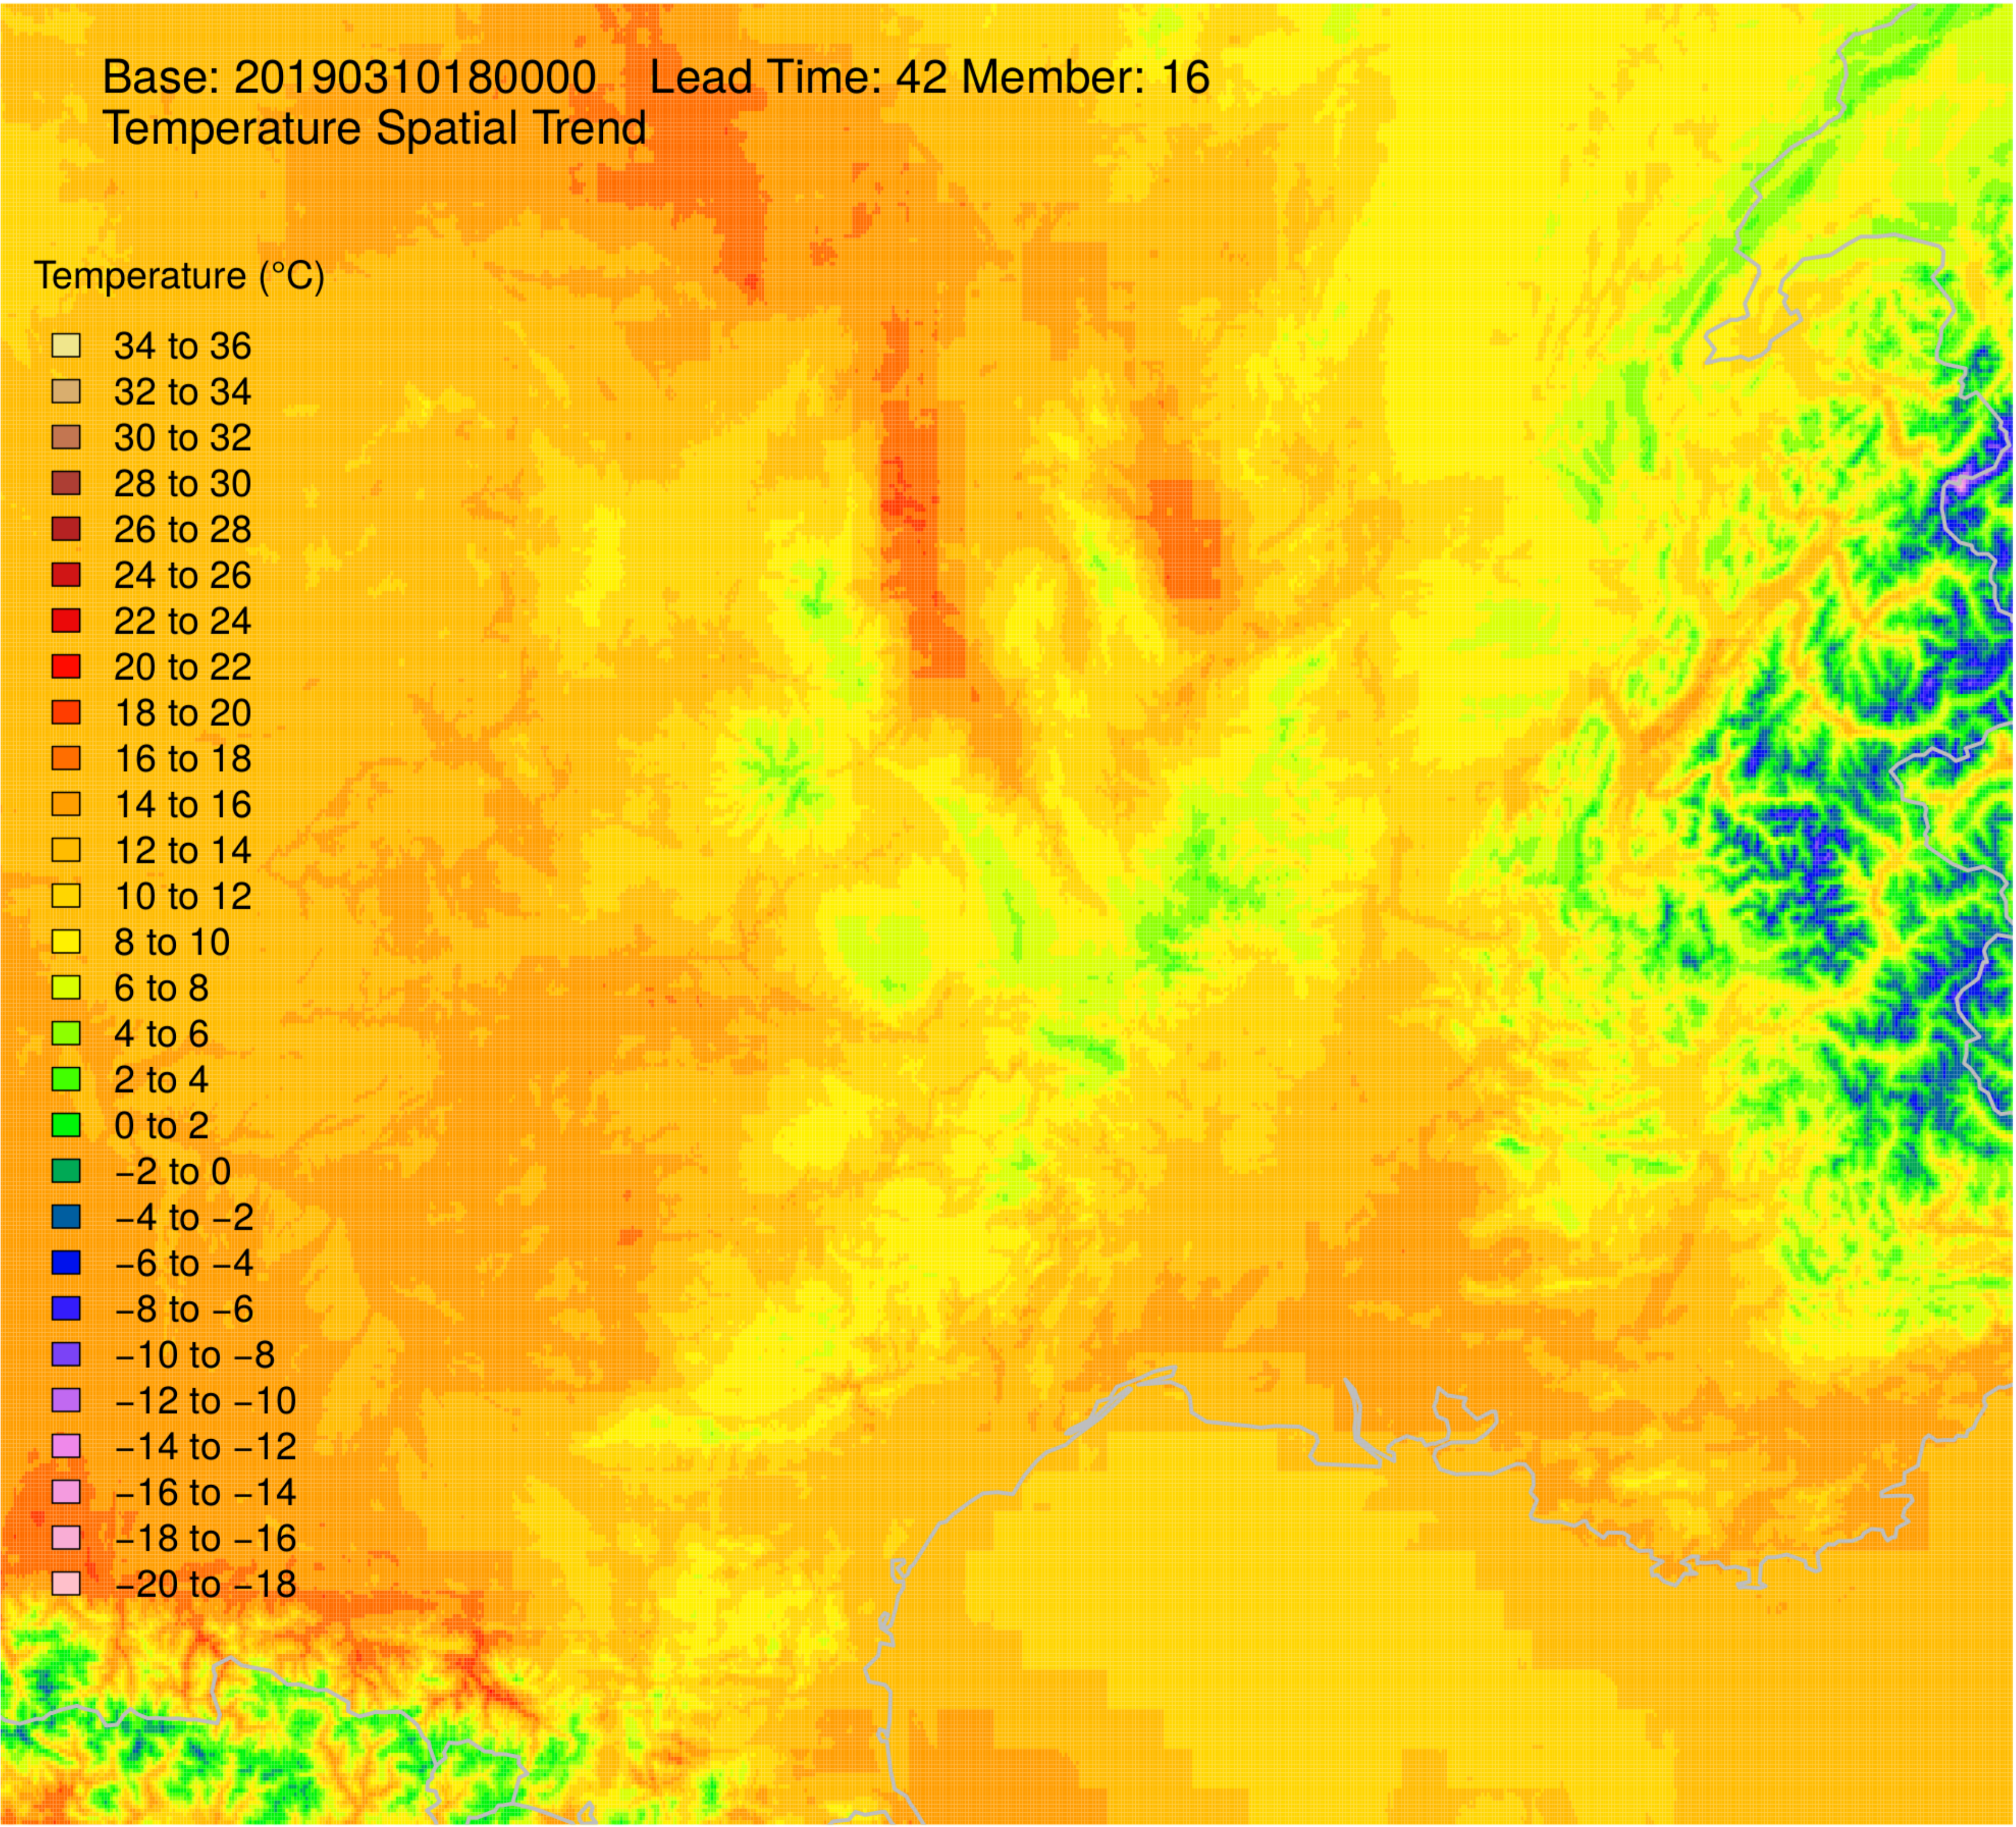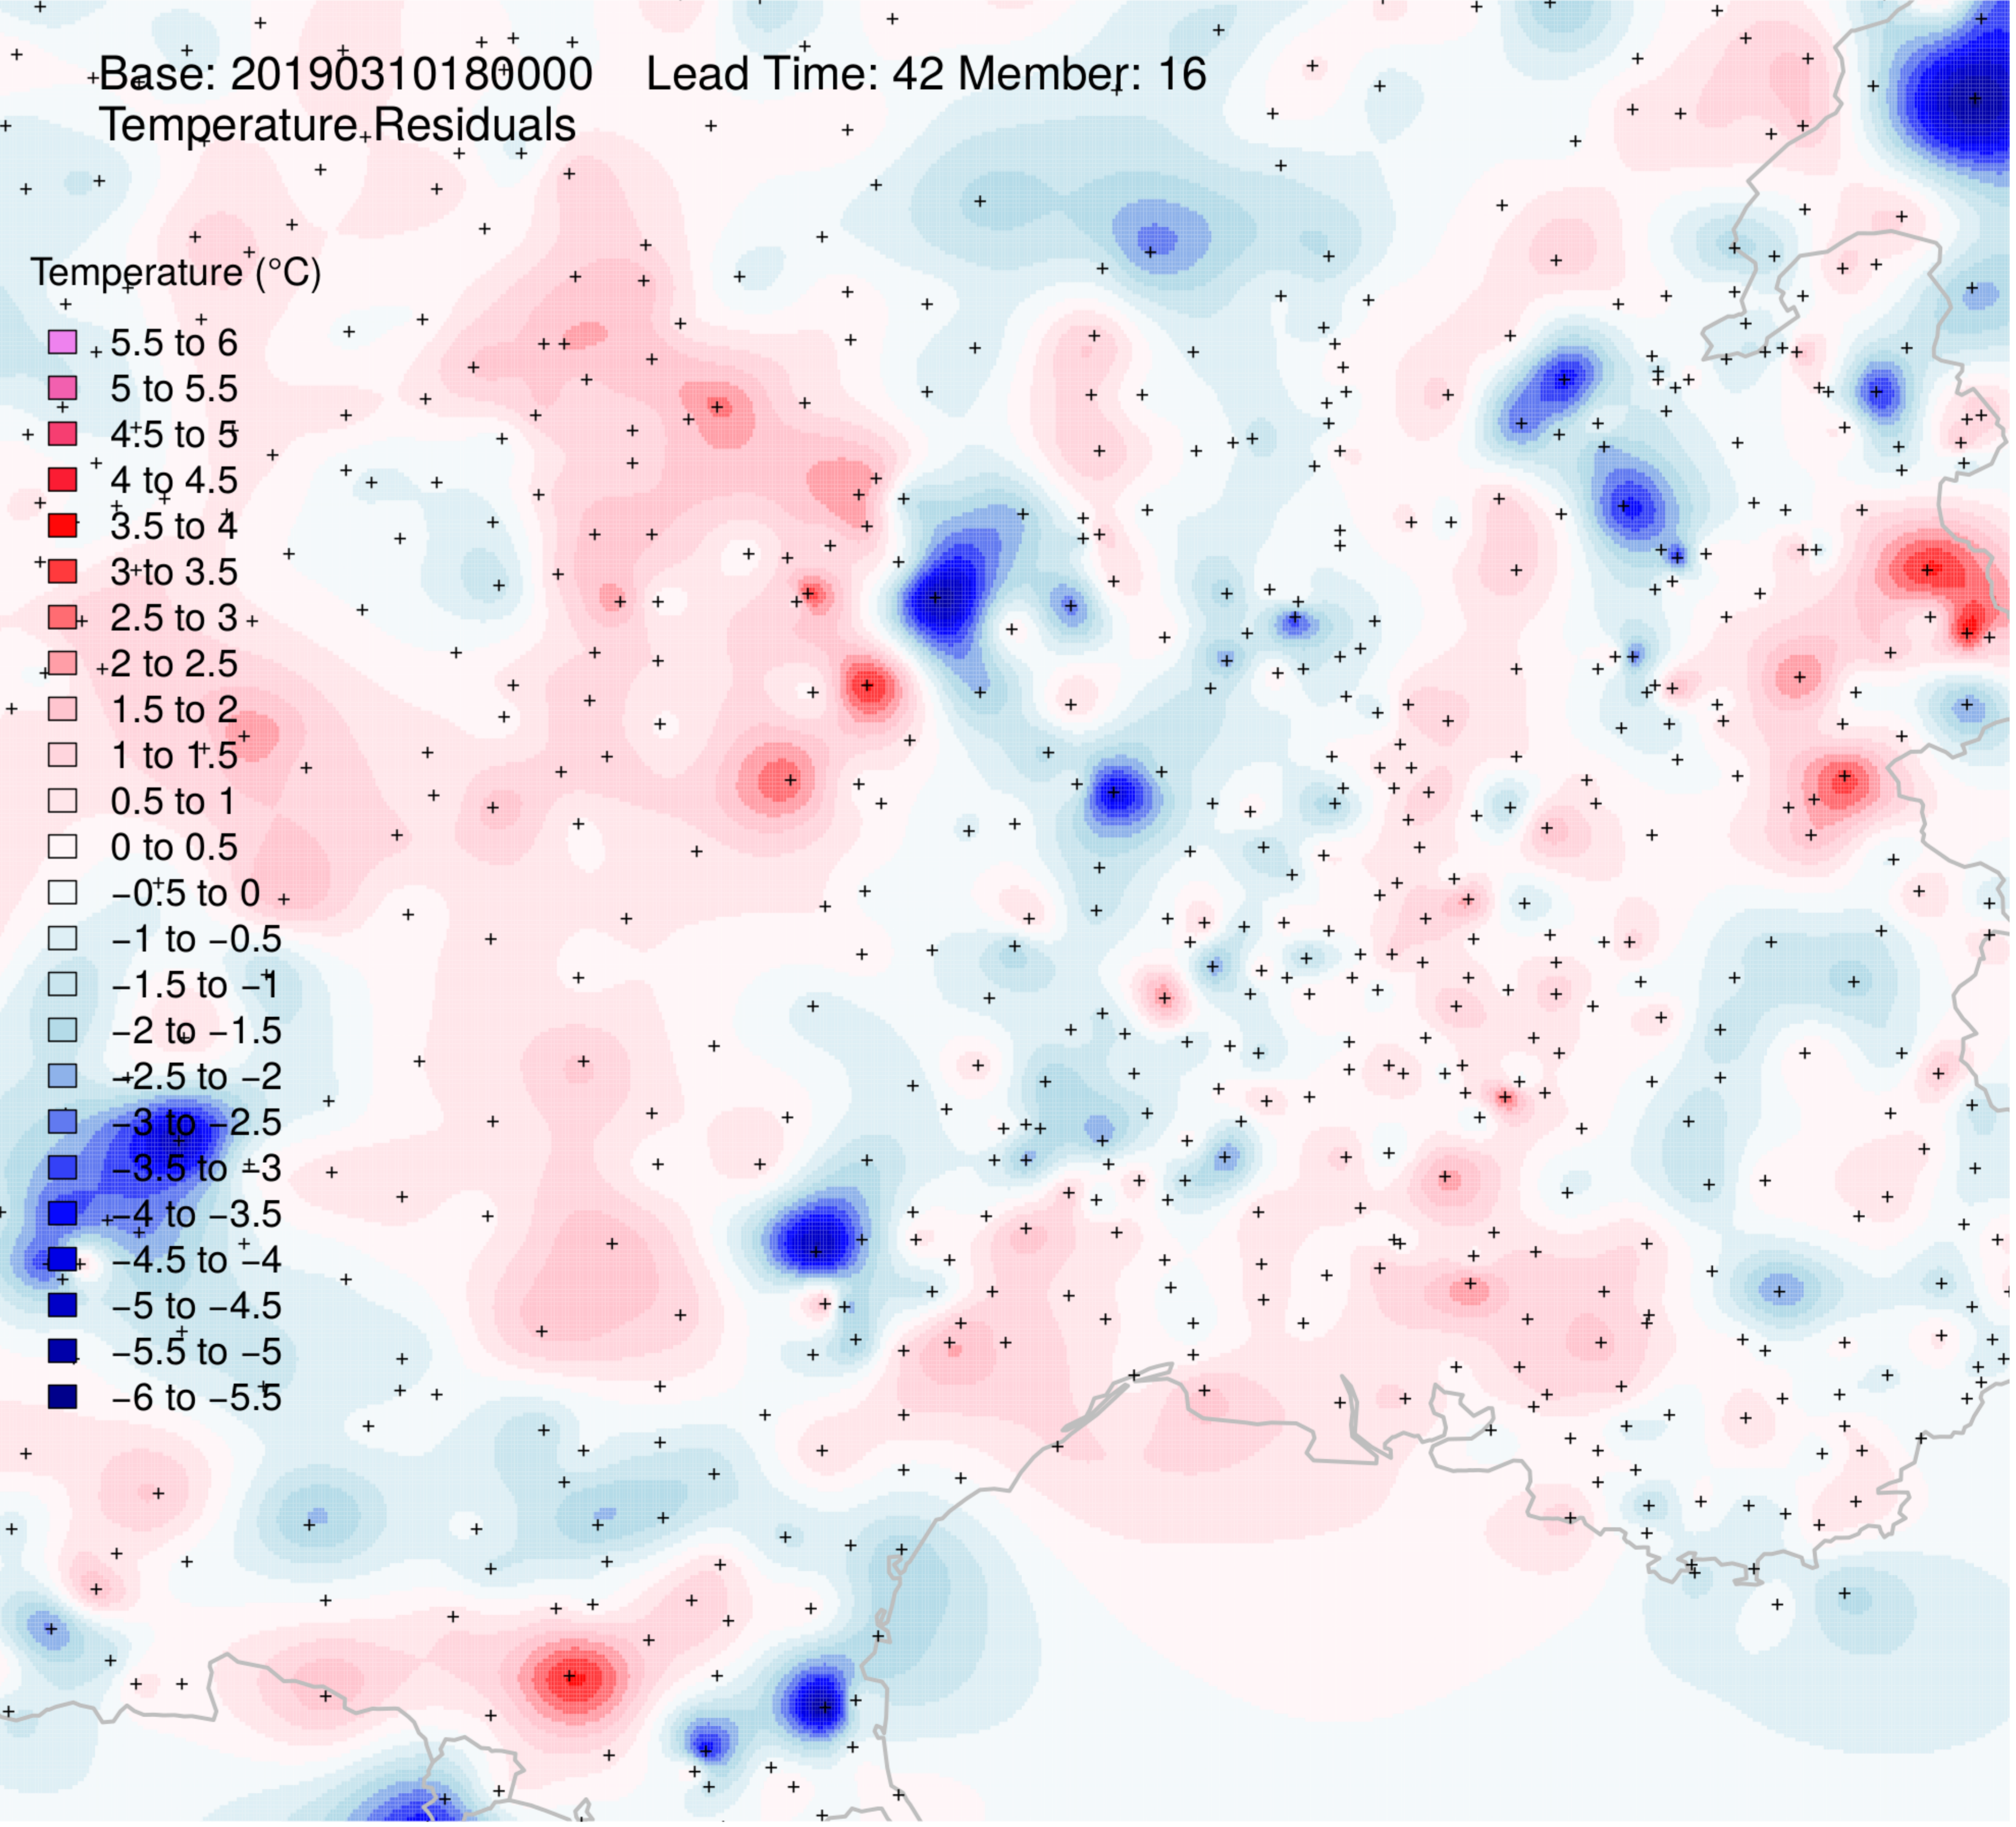

Supplement: Supplementary file 1 [file npg-27-329-2020-supplement.zip › testfig77.pdf]

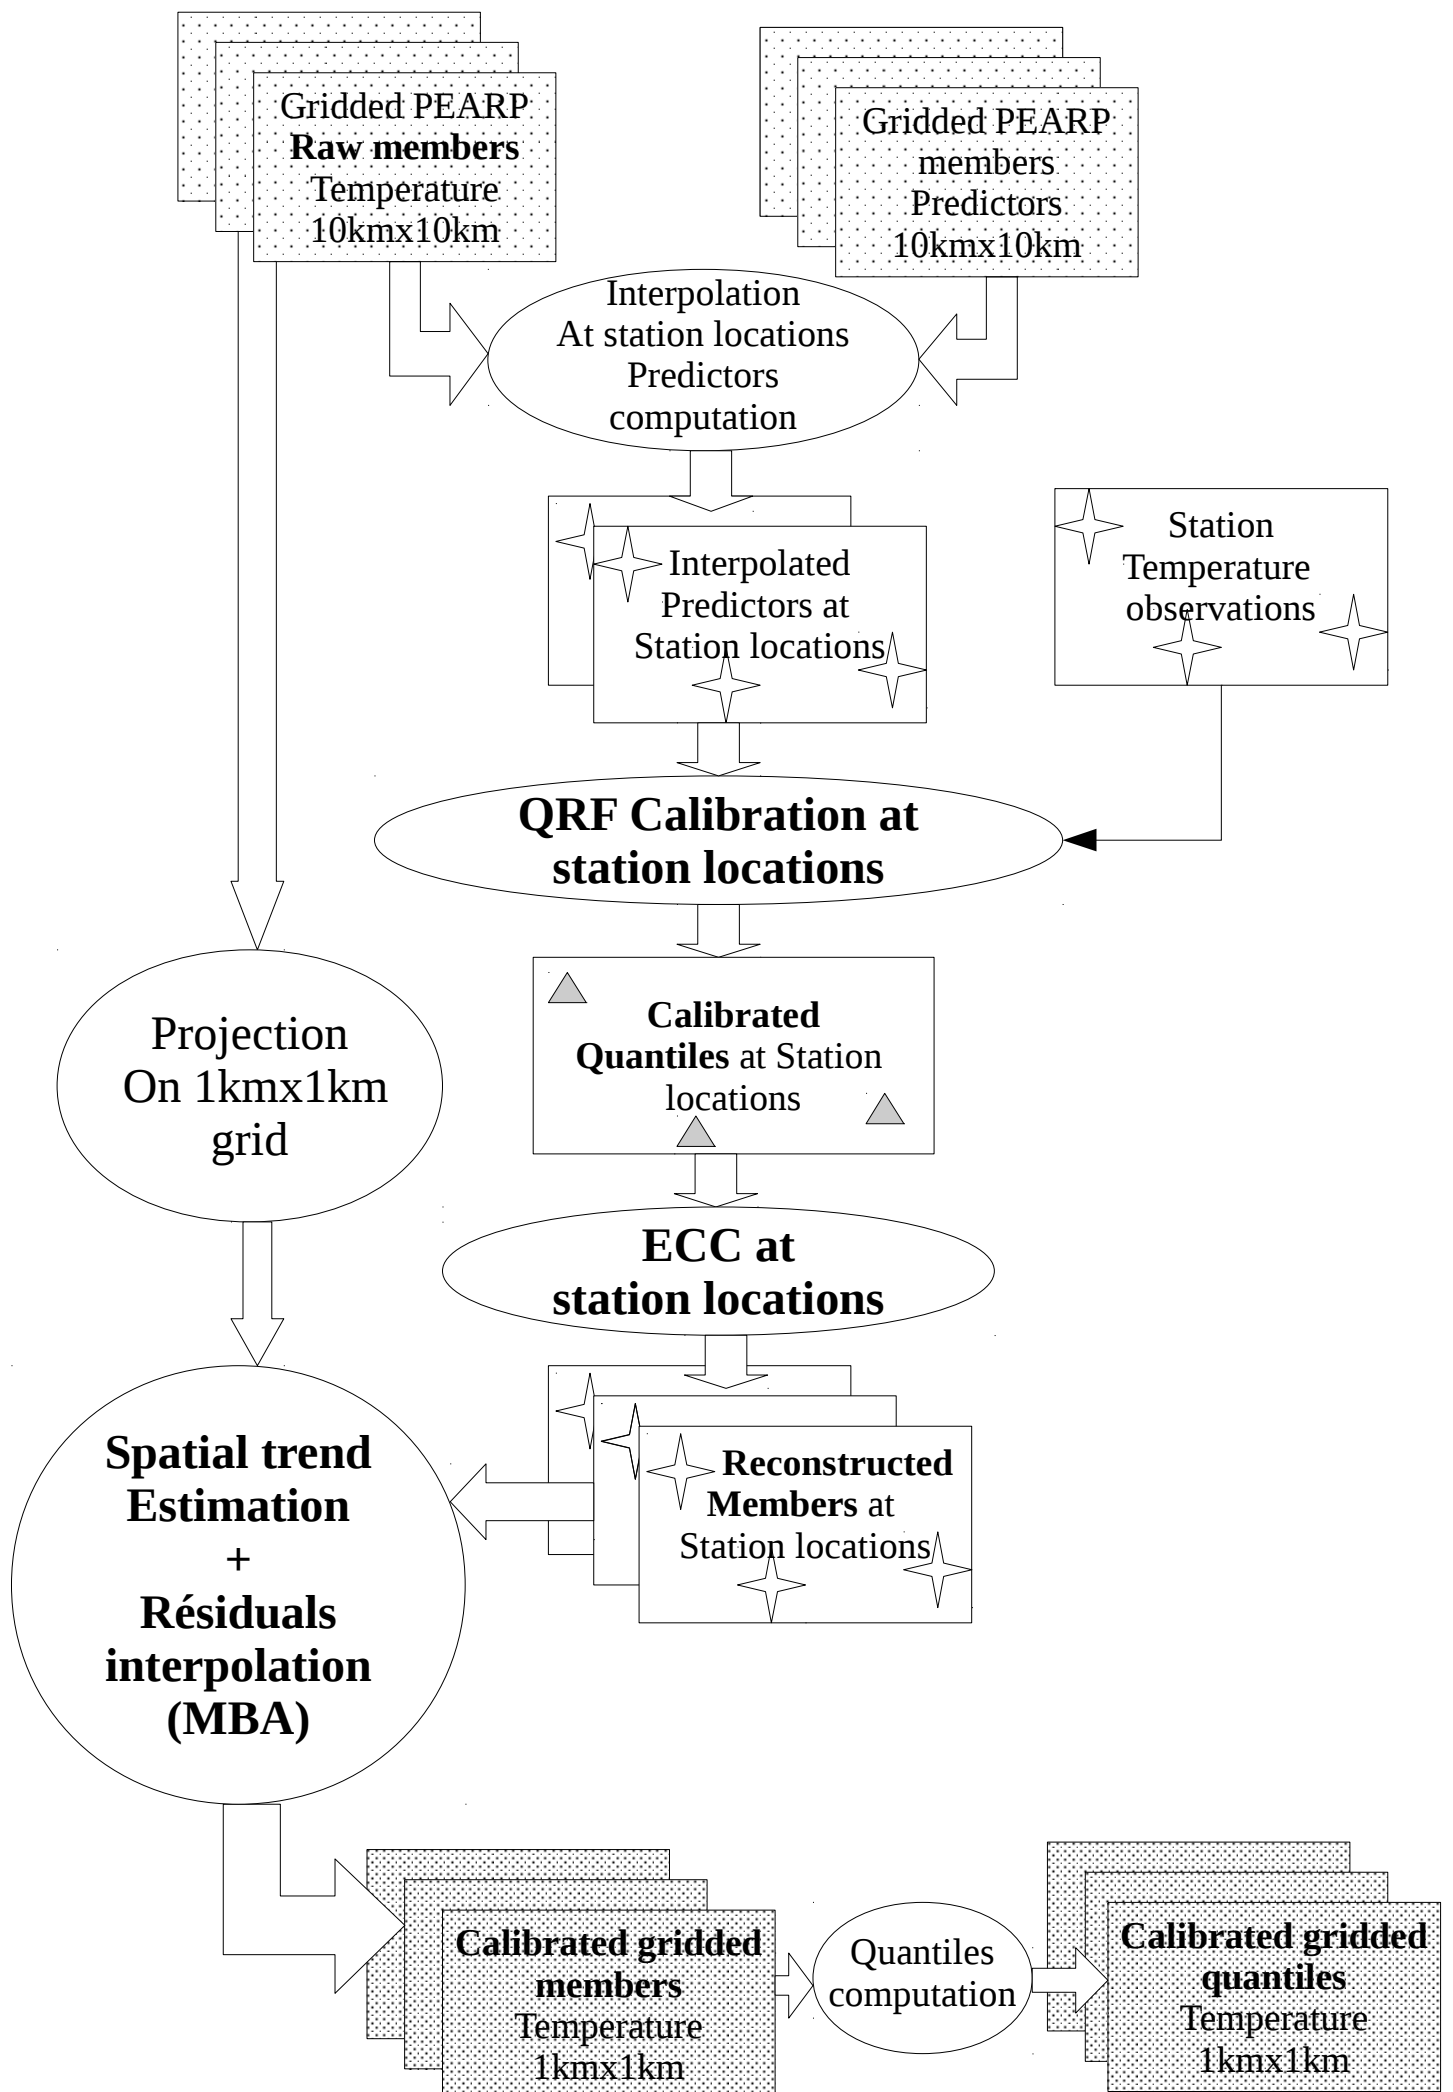

Supplement: Supplementary file 1 [file npg-27-329-2020-supplement.zip › flowchart.pdf]

**BIAS**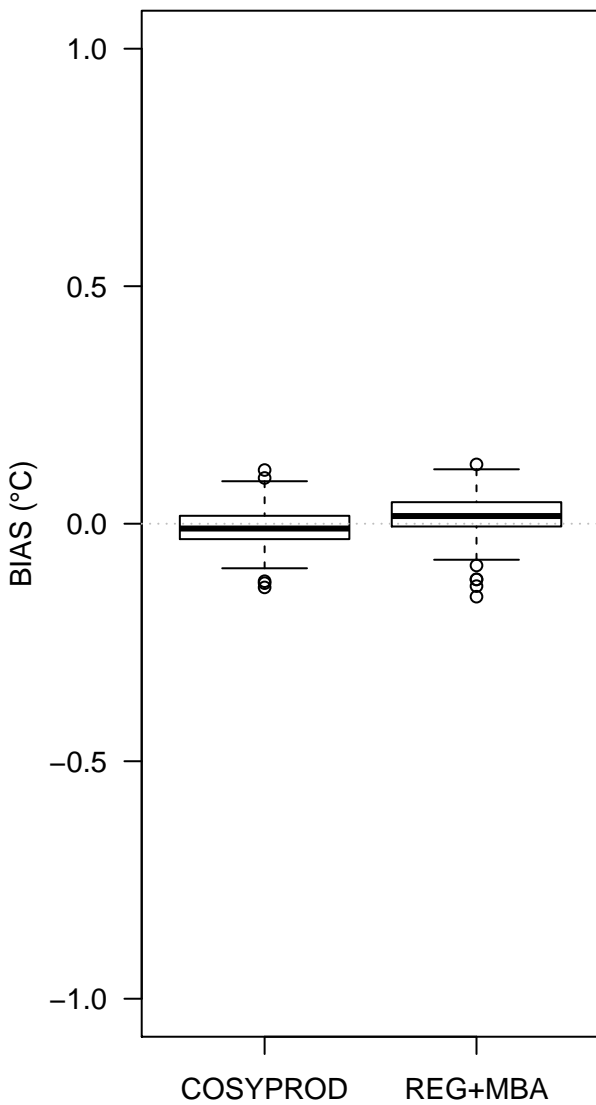**MAE**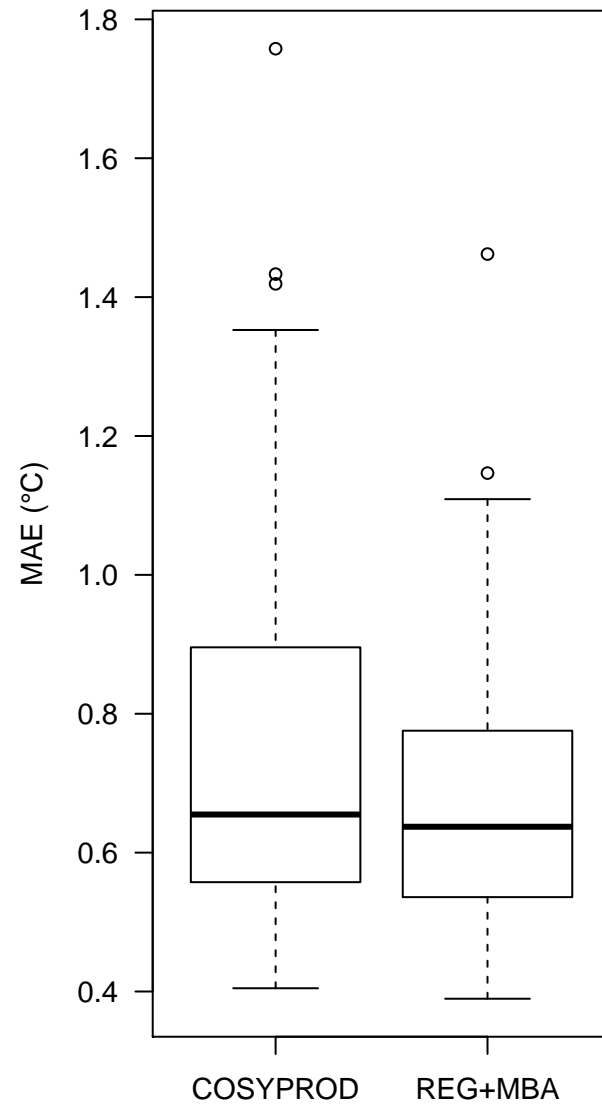**RMSE (°C)**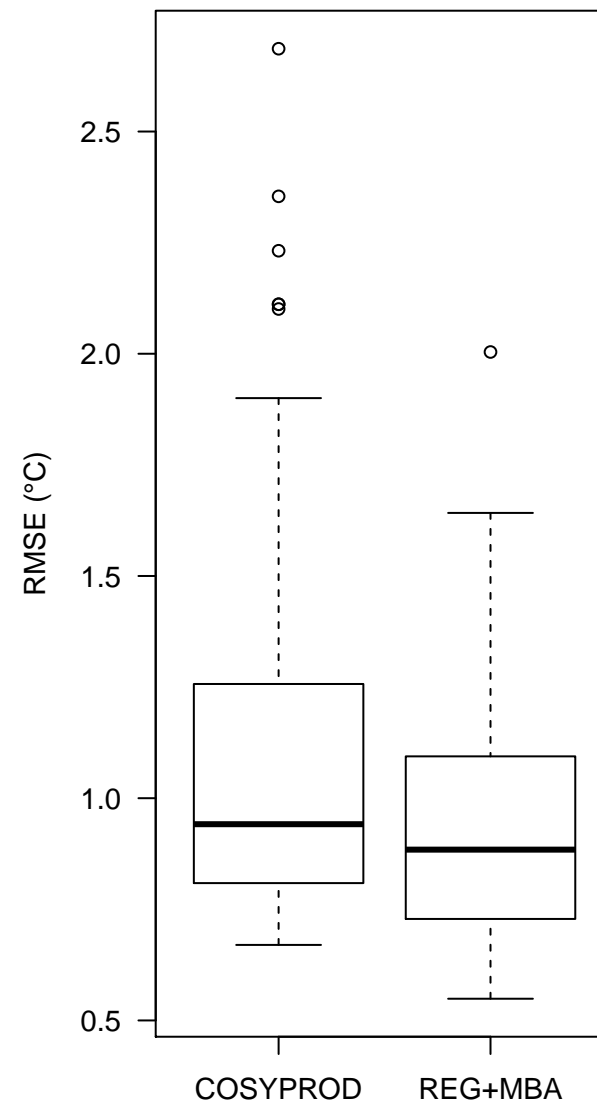**Q95 ABS. ERROR**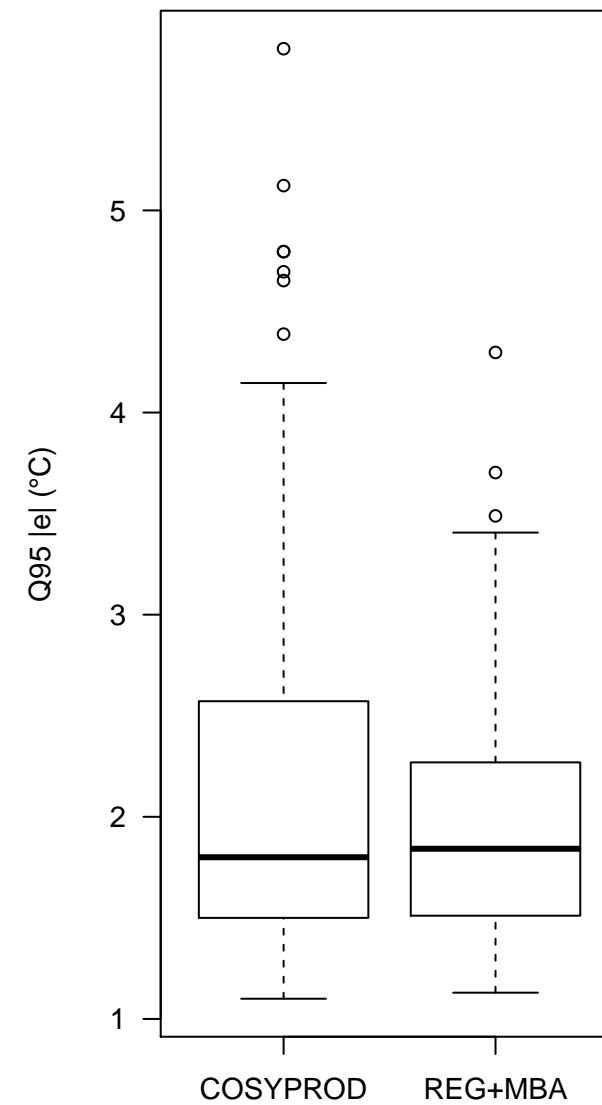

Supplement: Supplementary file 1 [file npg-27-329-2020-supplement.zip › figure6.pdf]

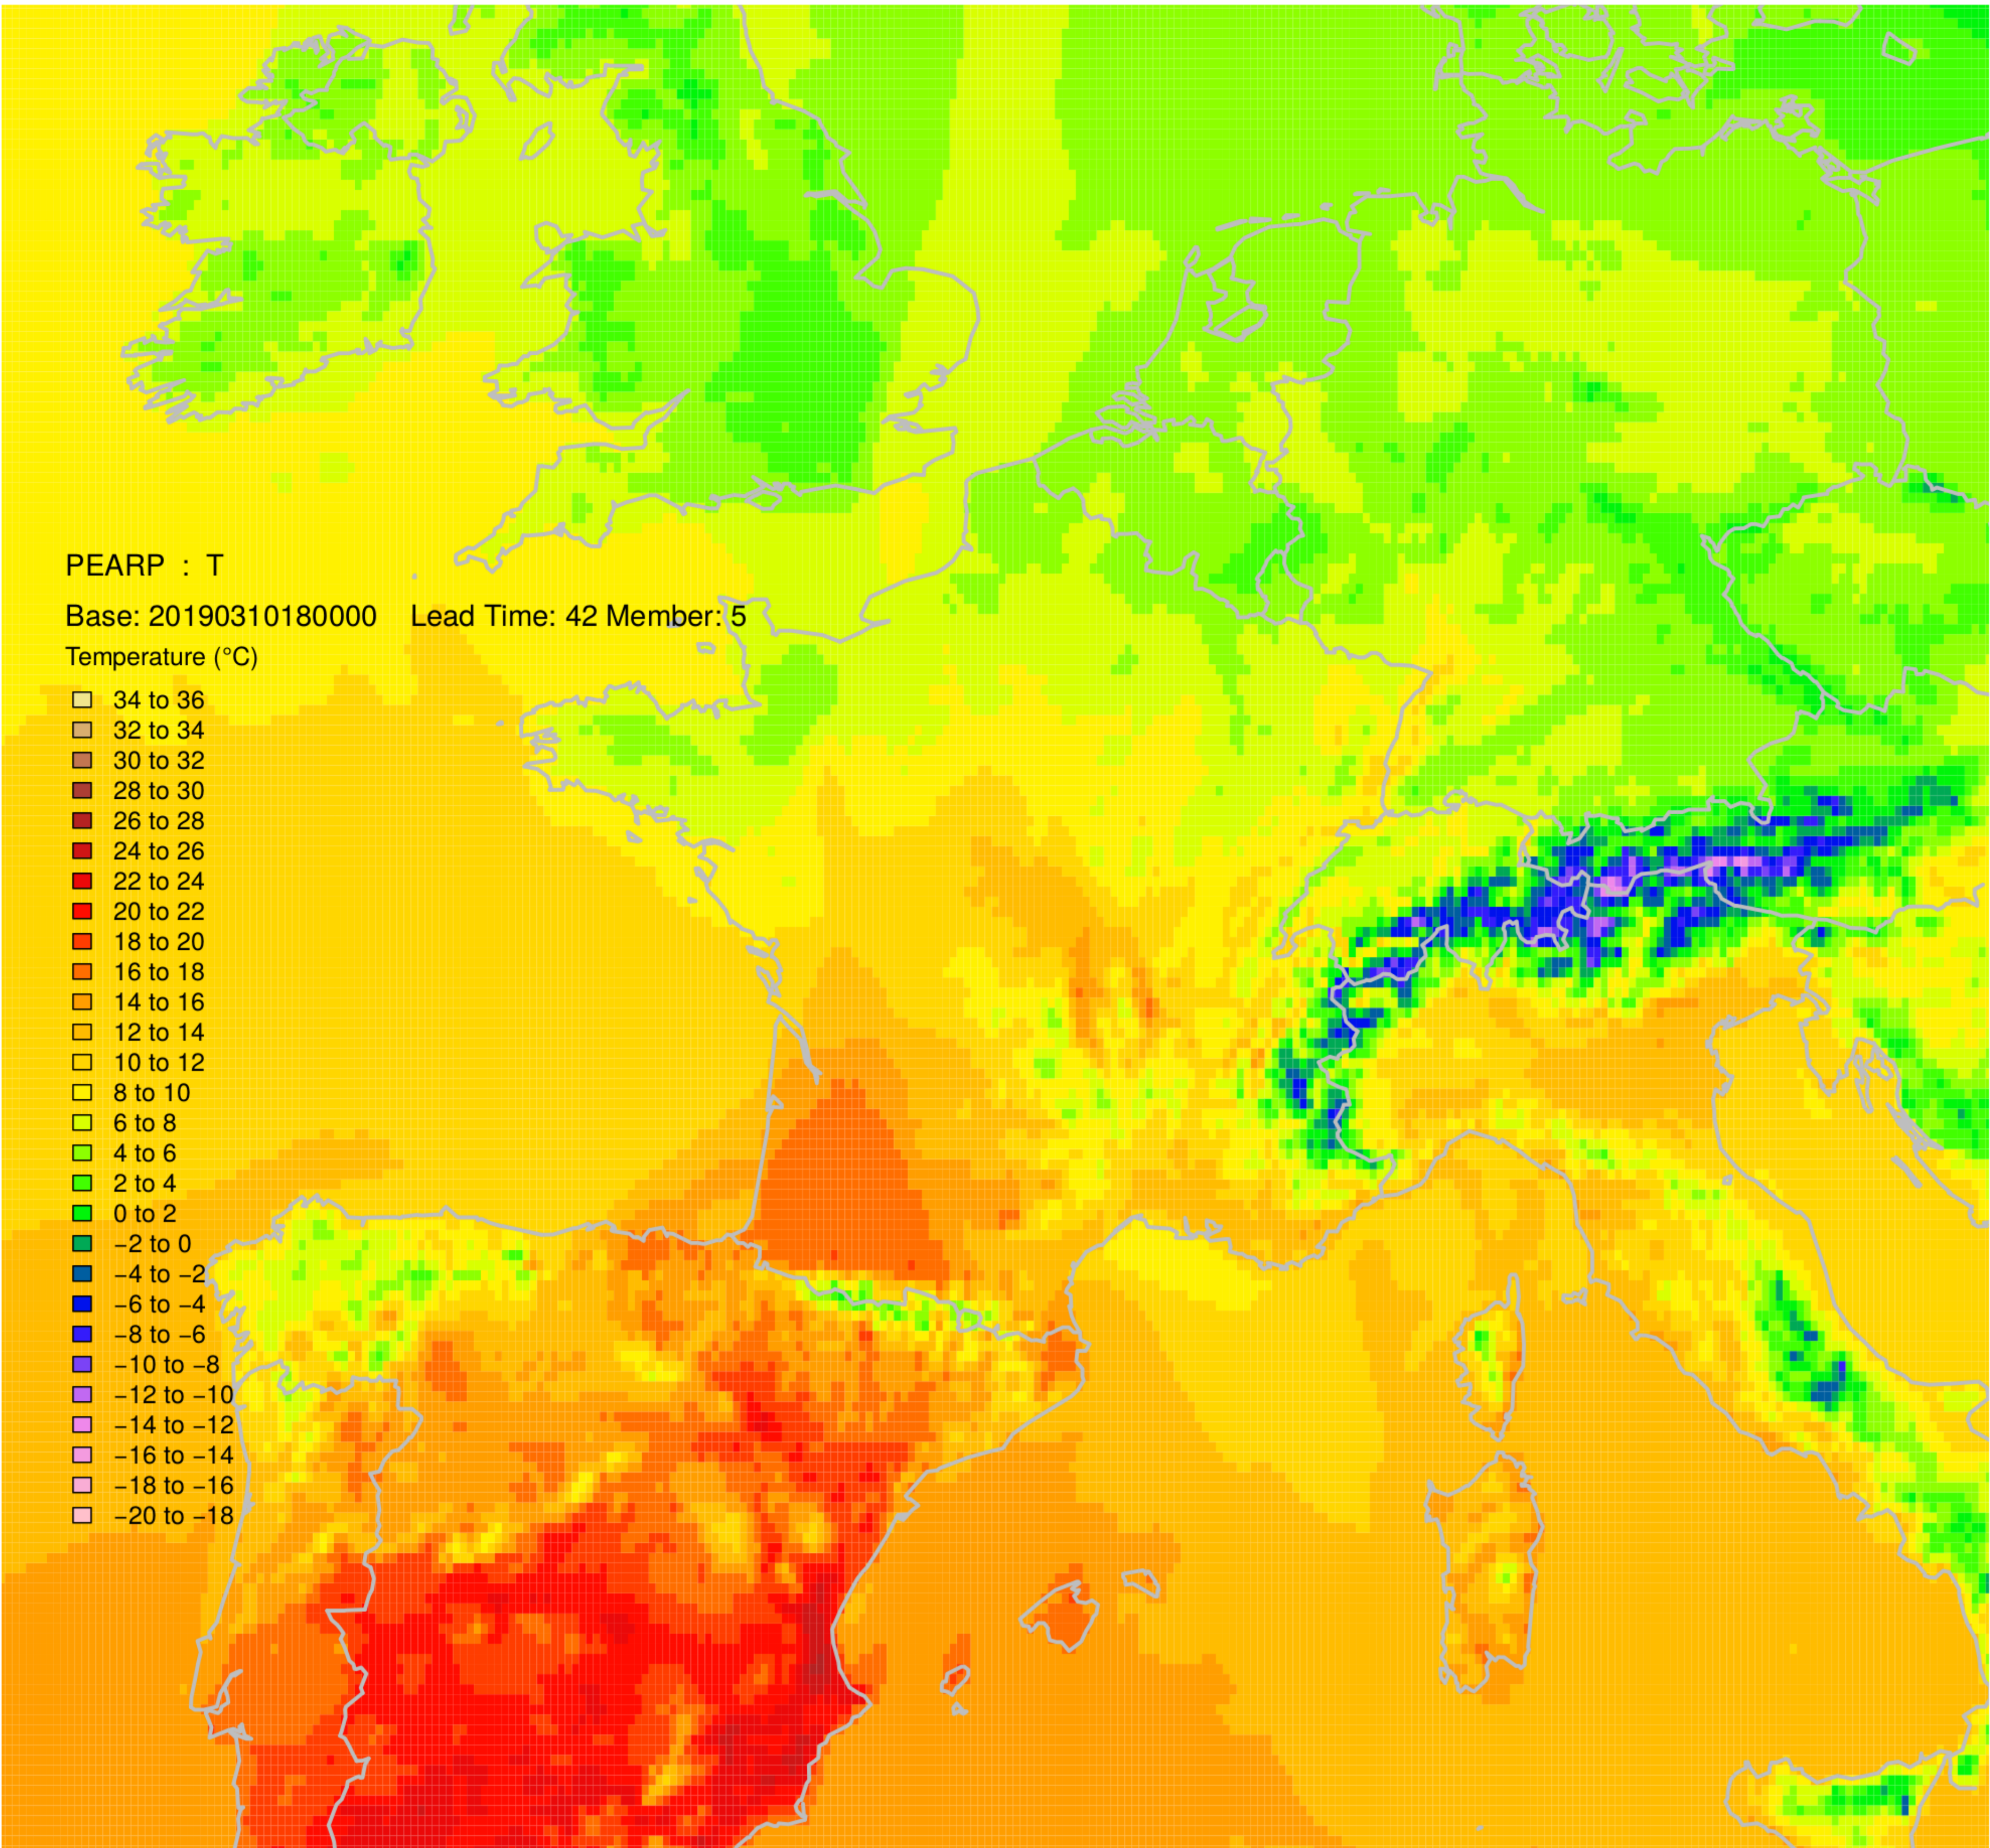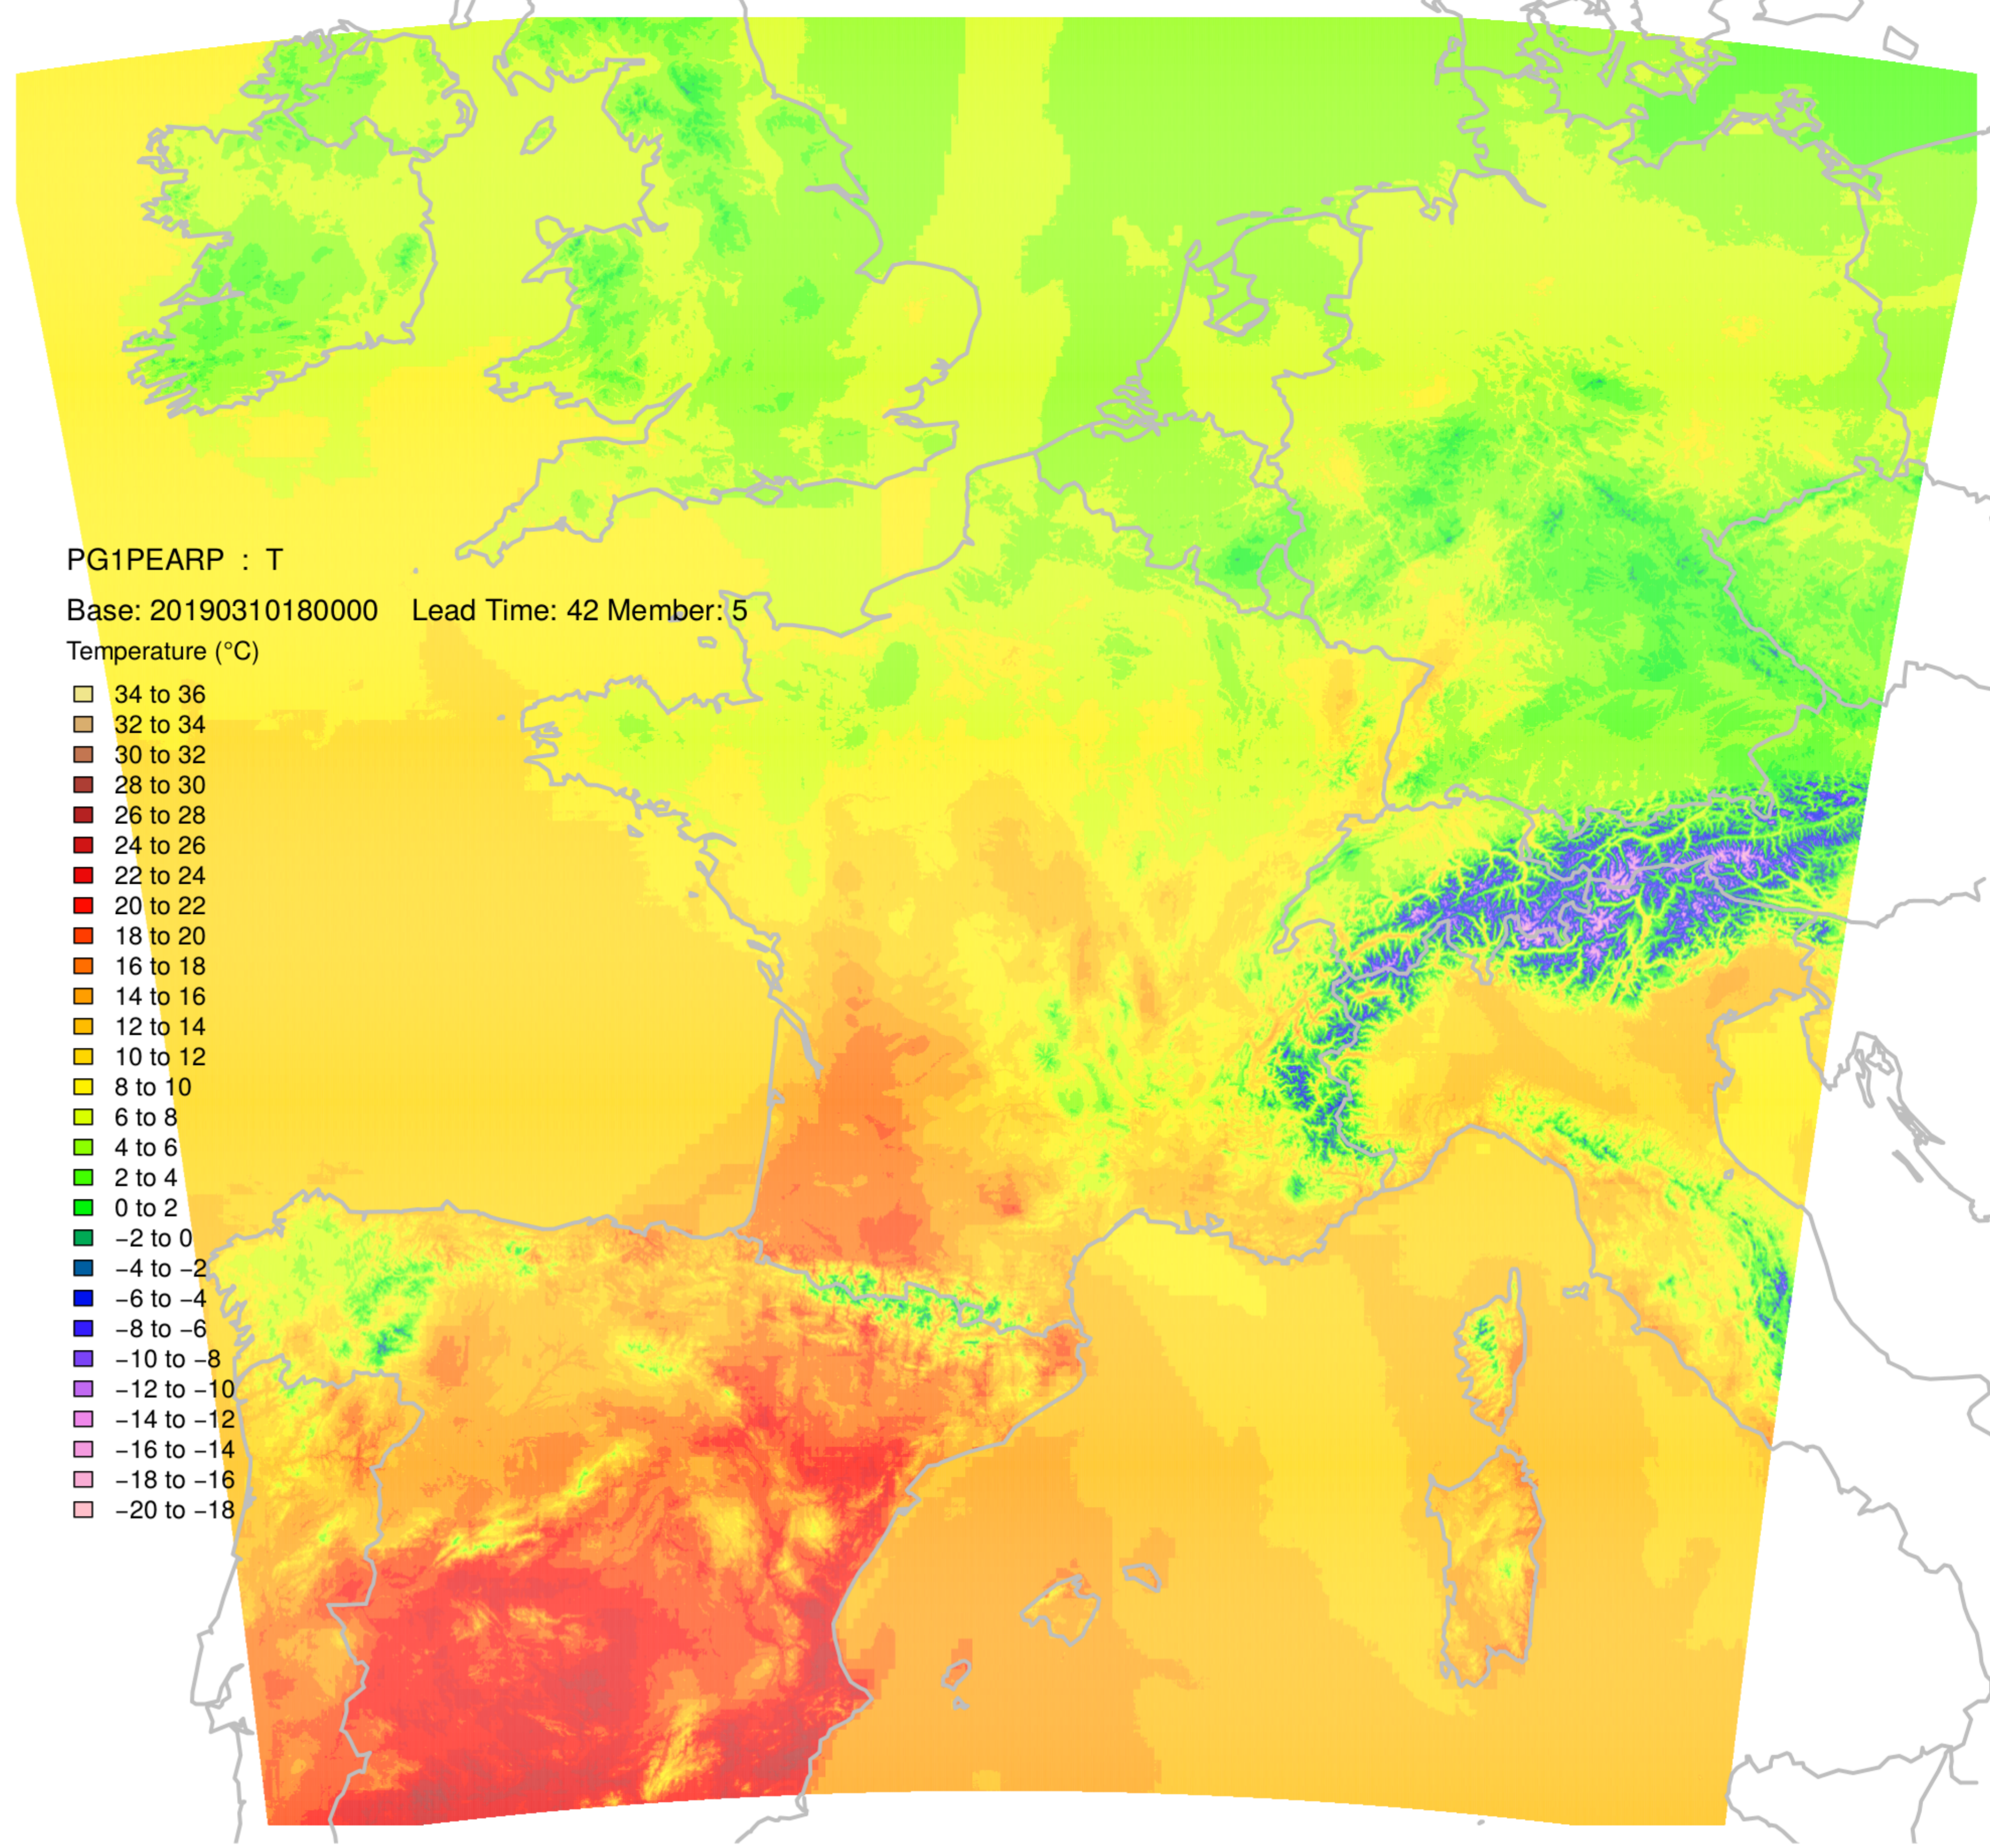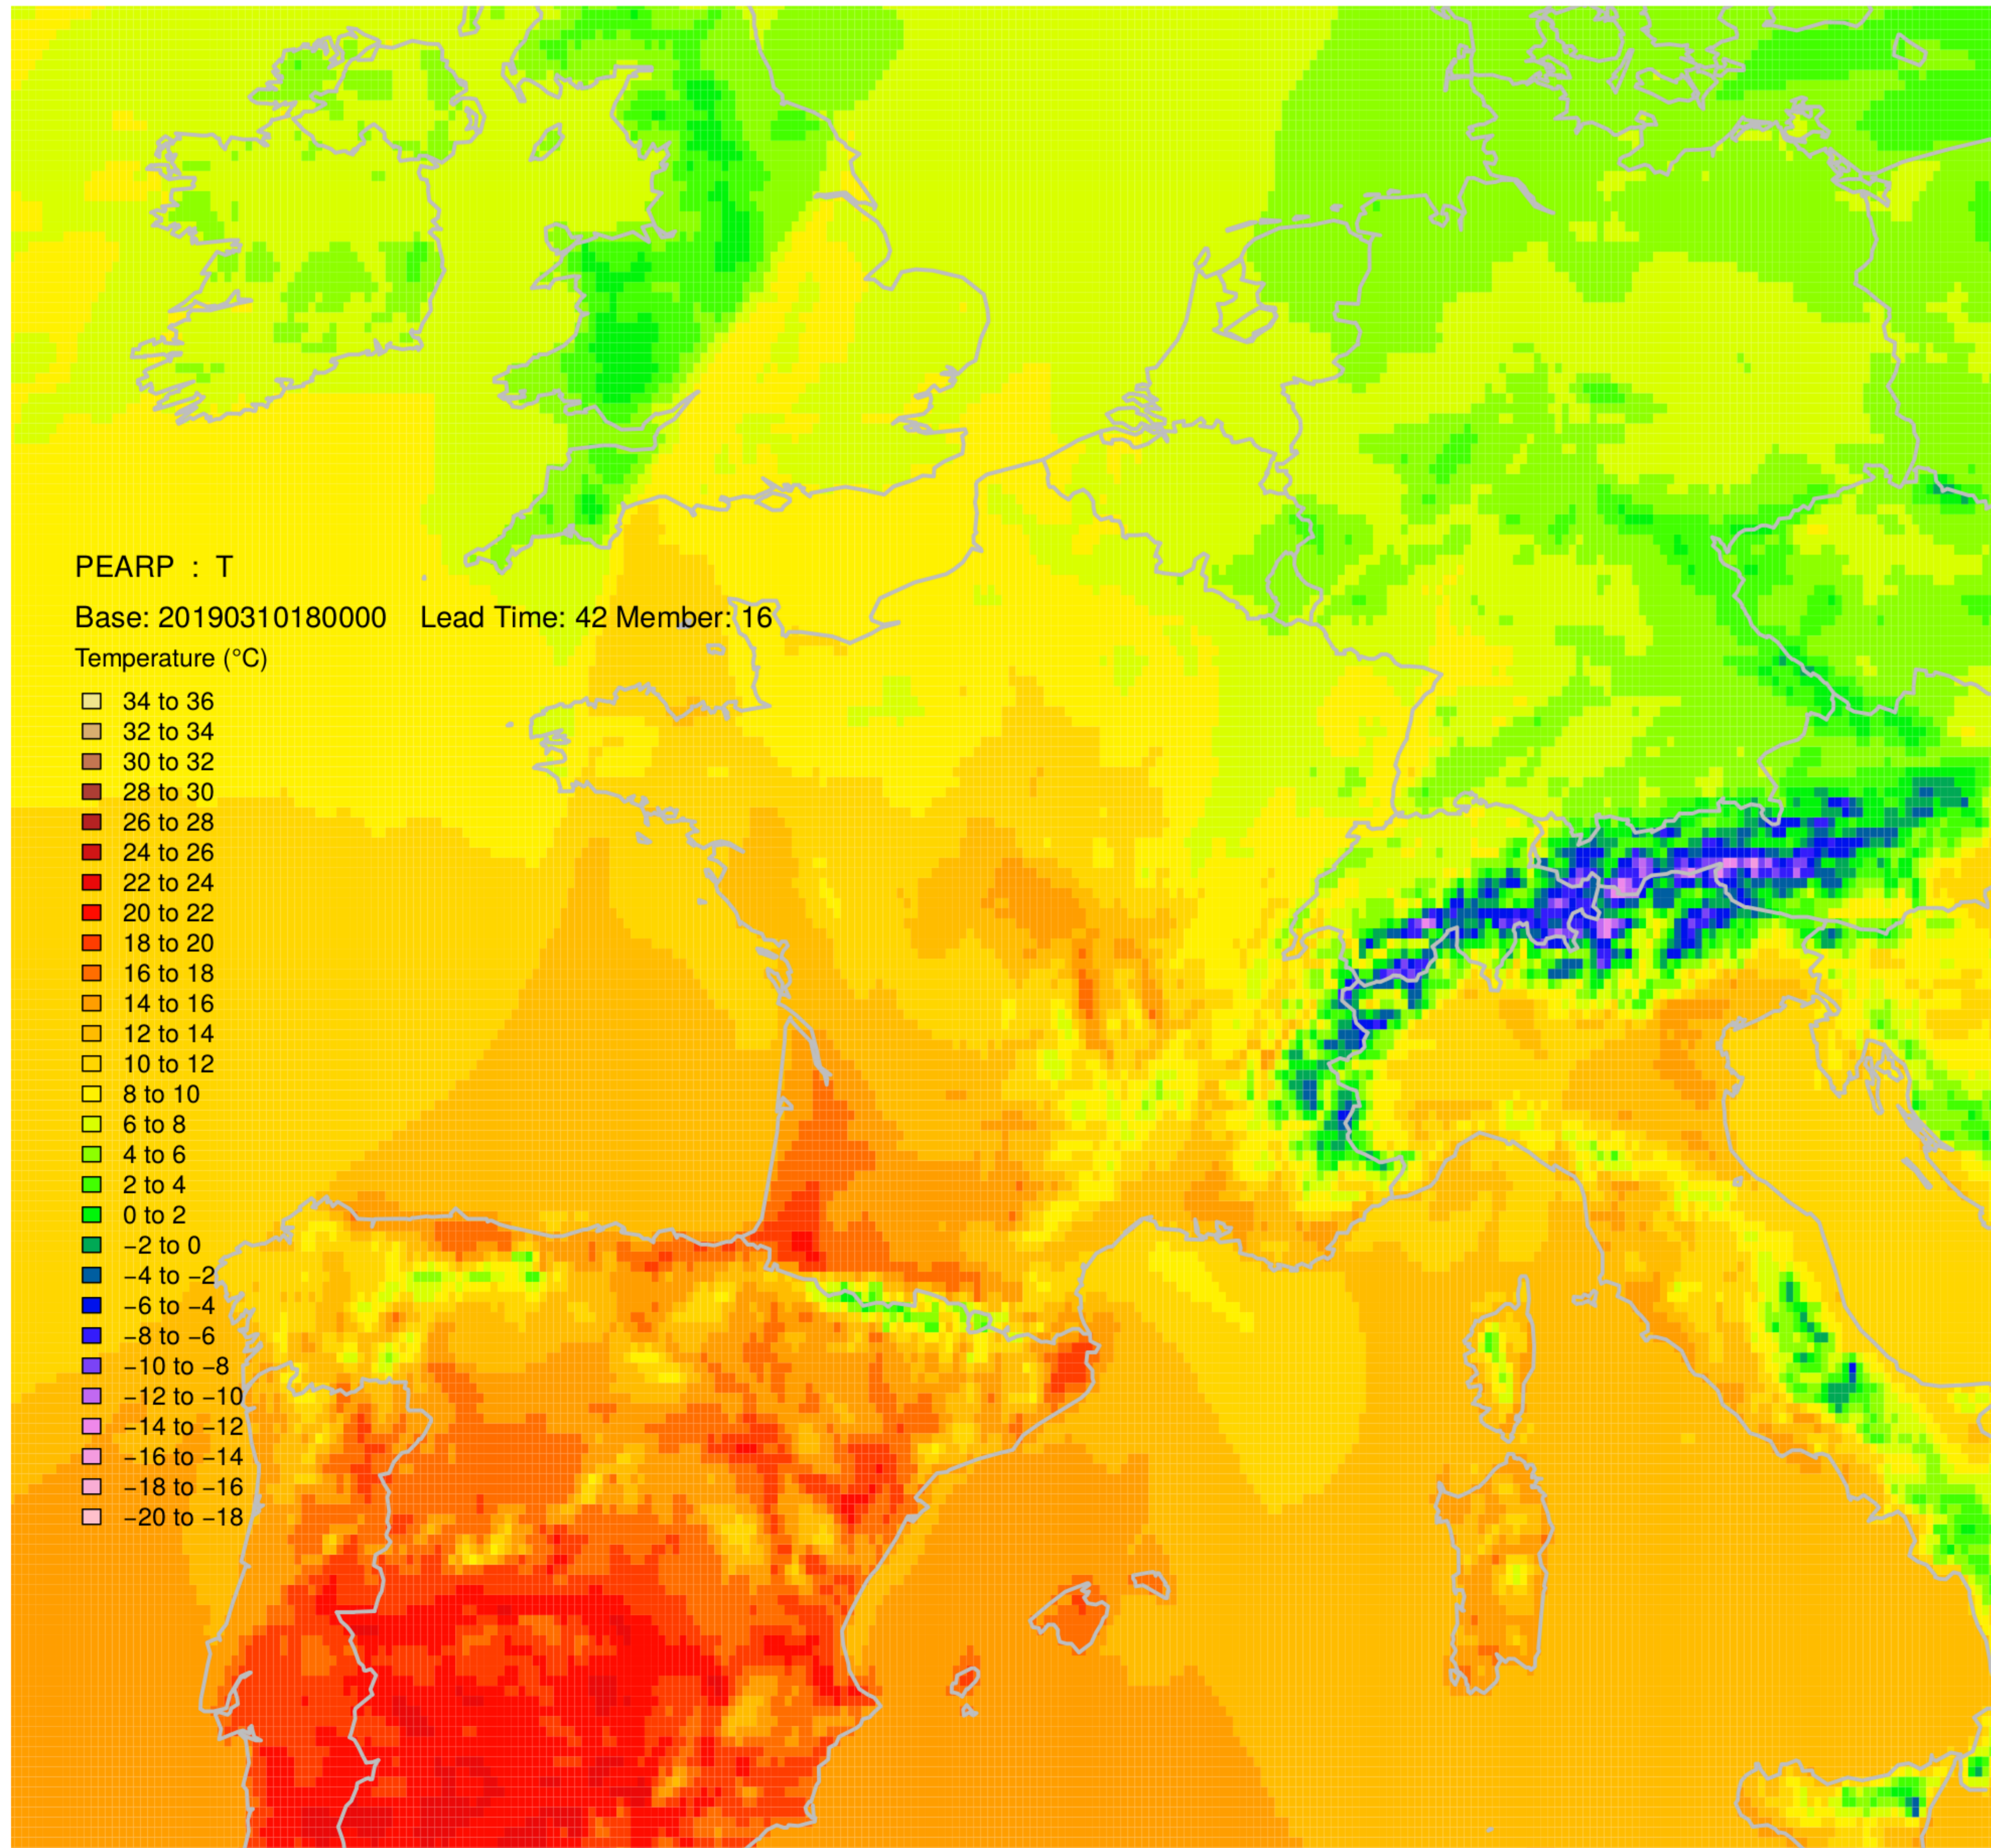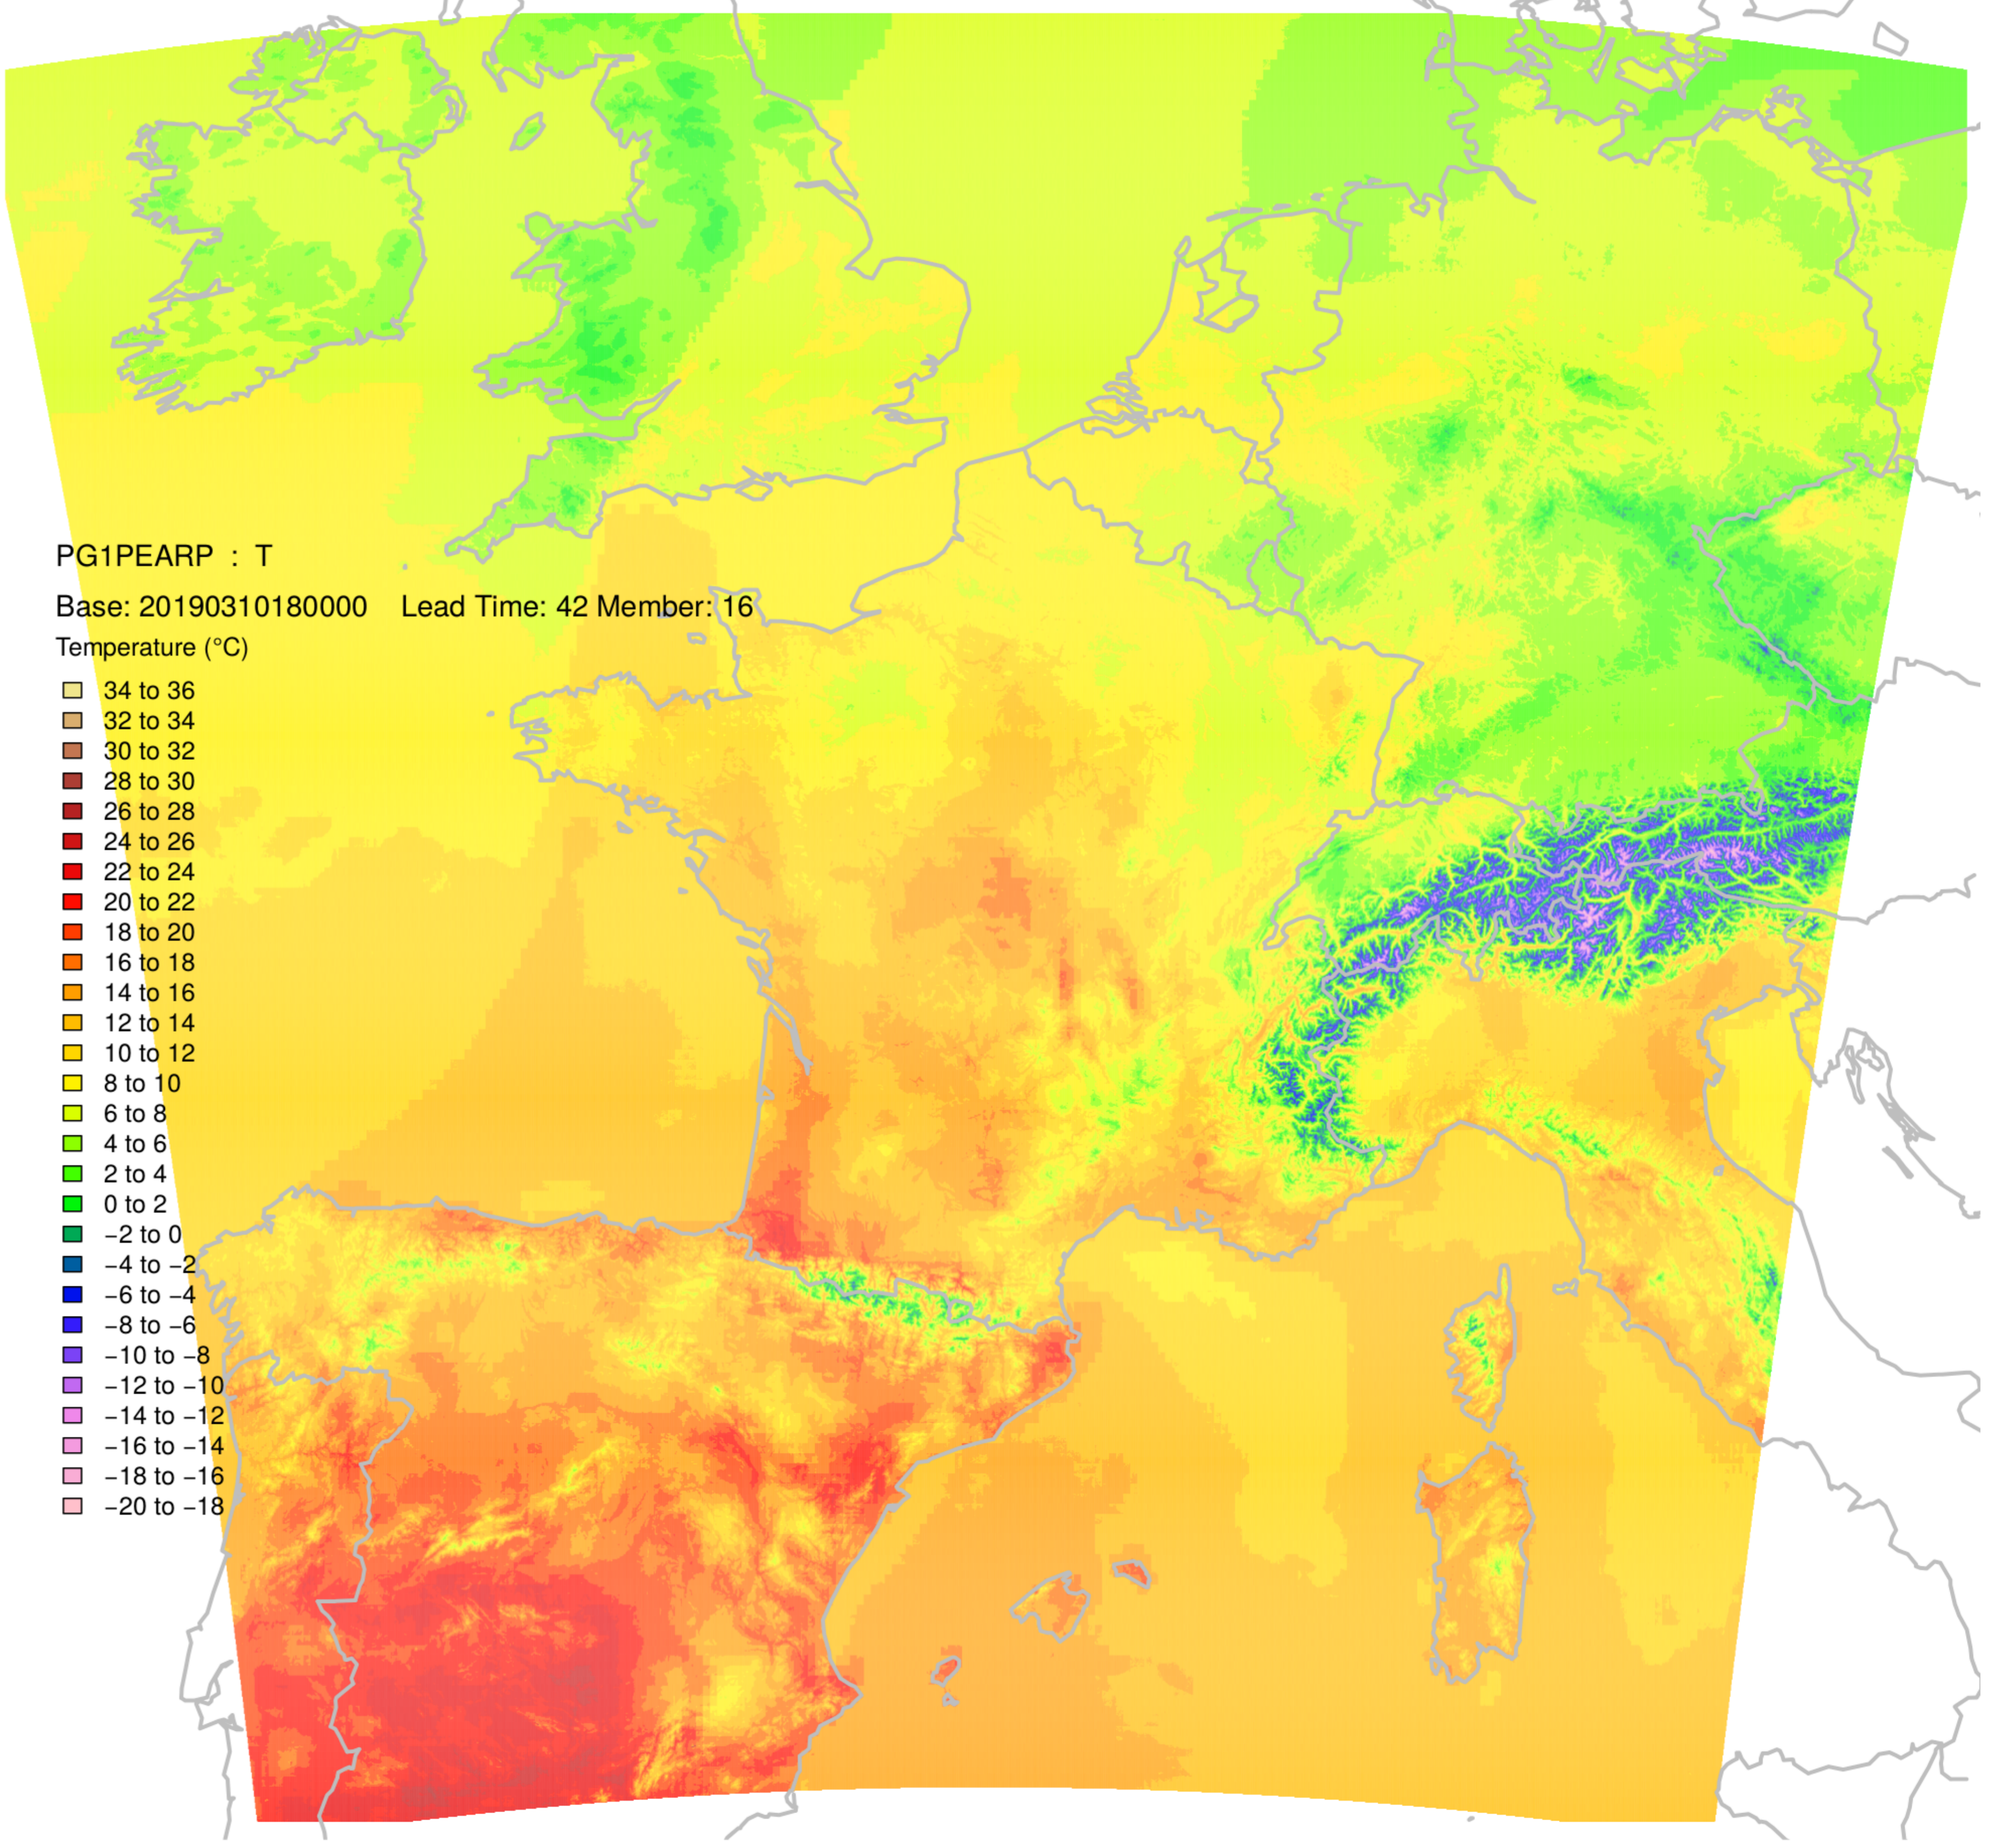

Supplement: Supplementary file 1 [file npg-27-329-2020-supplement.zip › testfig99.pdf]

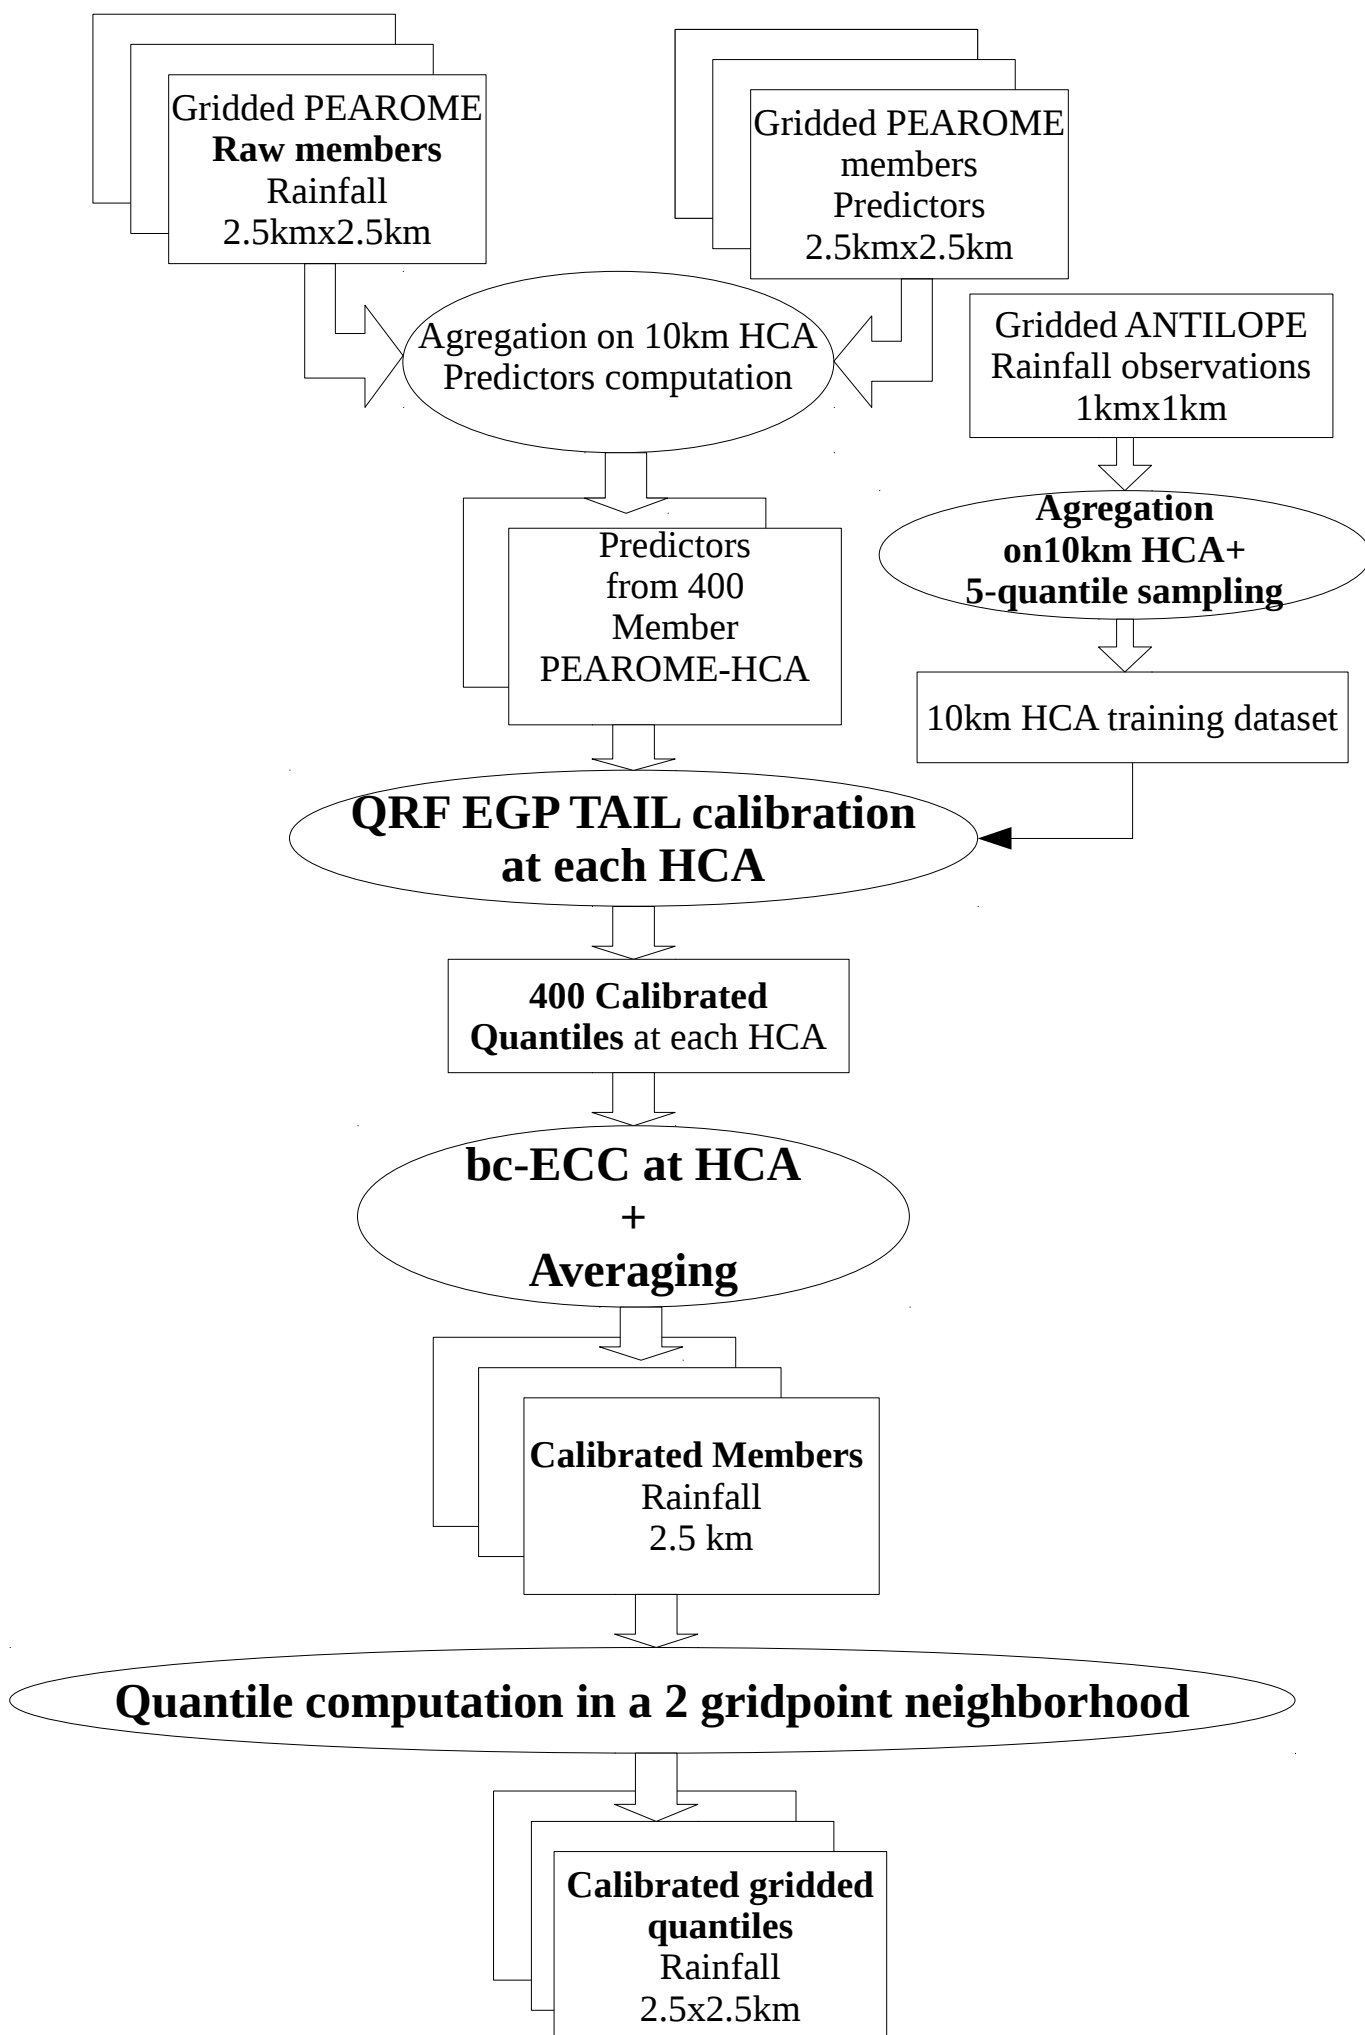

Supplement: Supplementary file 1 [file npg-27-329-2020-supplement.zip › flowchart_maximus.pdf]

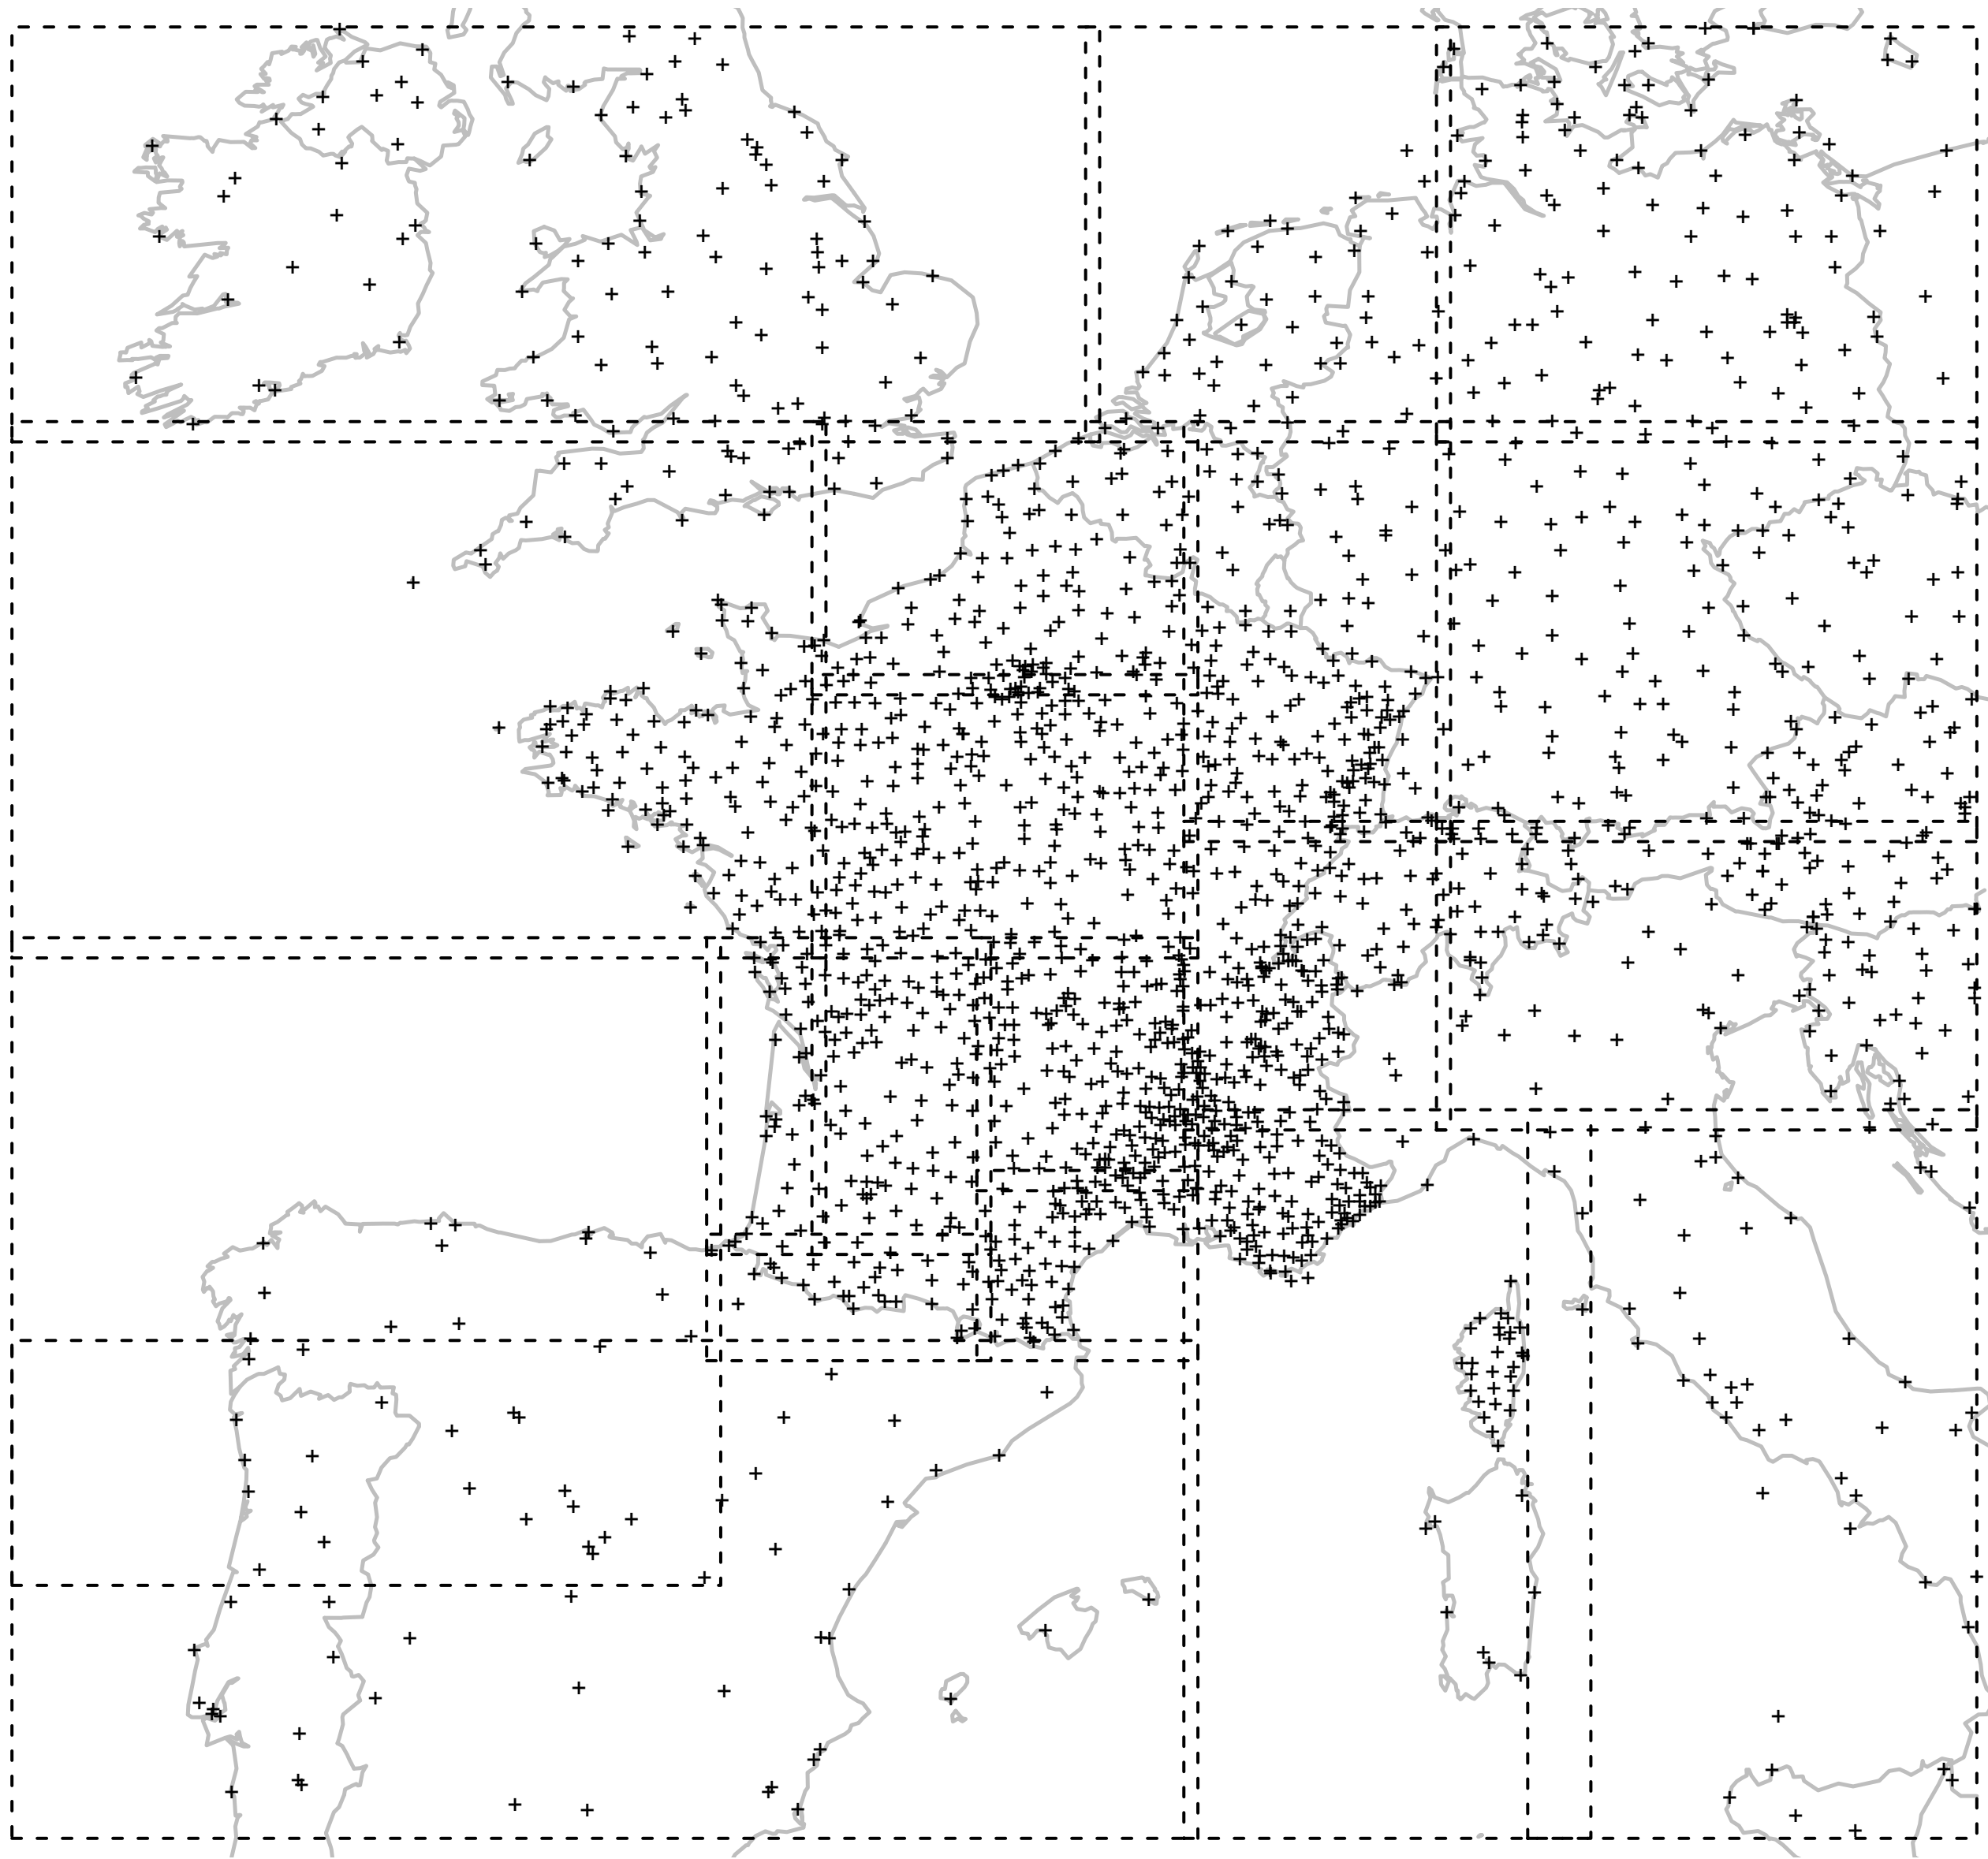

Supplement: Supplementary file 1 [file npg-27-329-2020-supplement.zip › zones.pdf]

**Stations EURW1S100**

**2056 points**

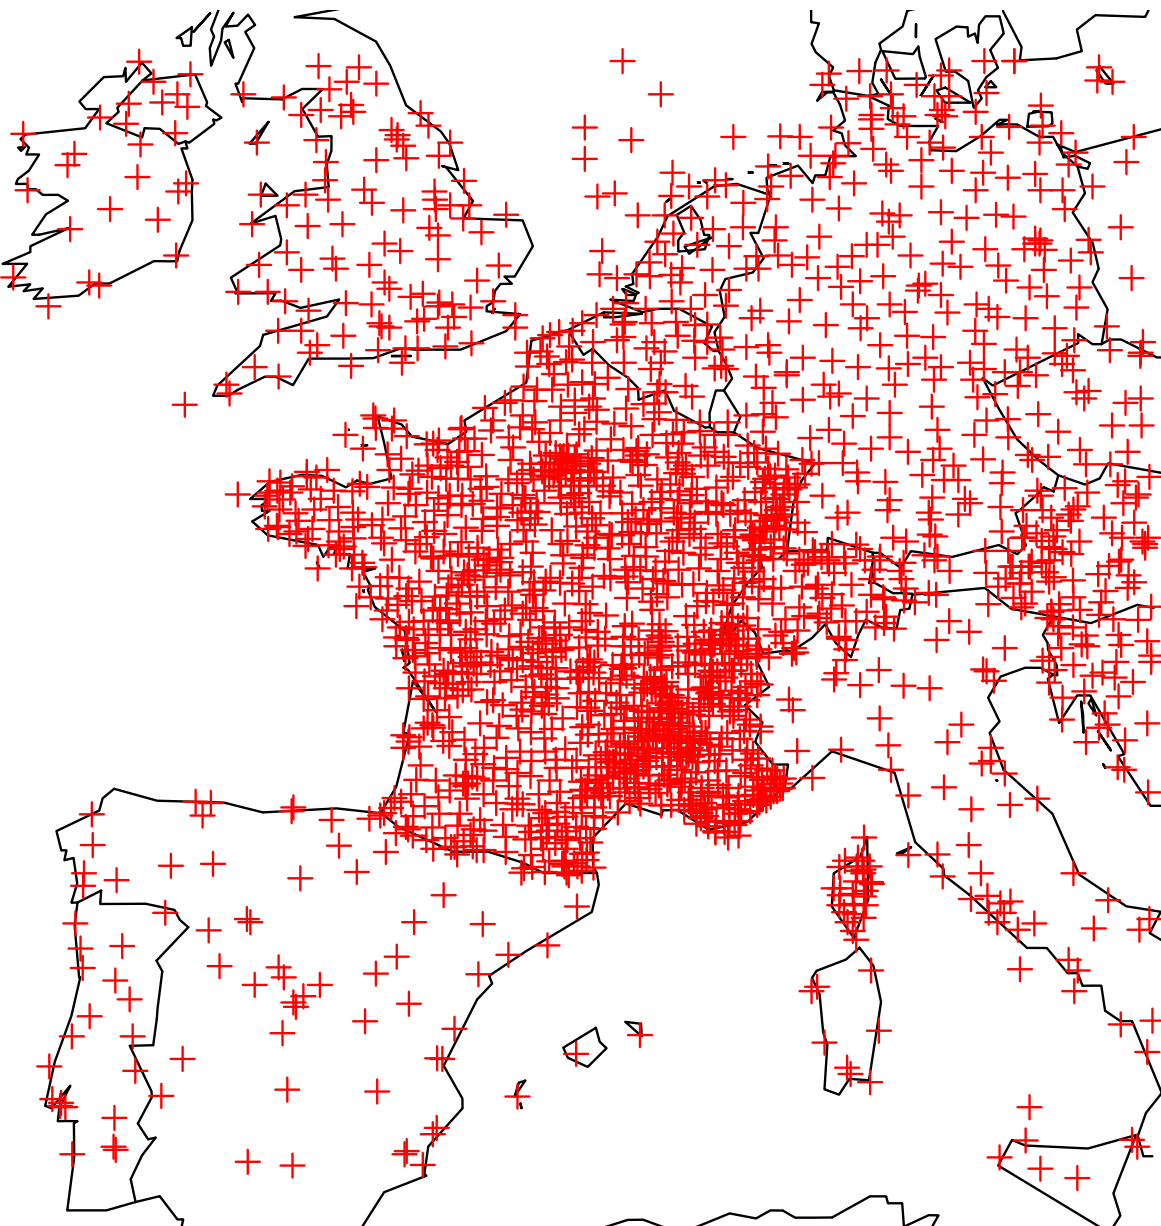

Supplement: Supplementary file 1 [file npg-27-329-2020-supplement.zip › stationseurw.pdf]

time-averaged maximum of Peirce's Skill Score

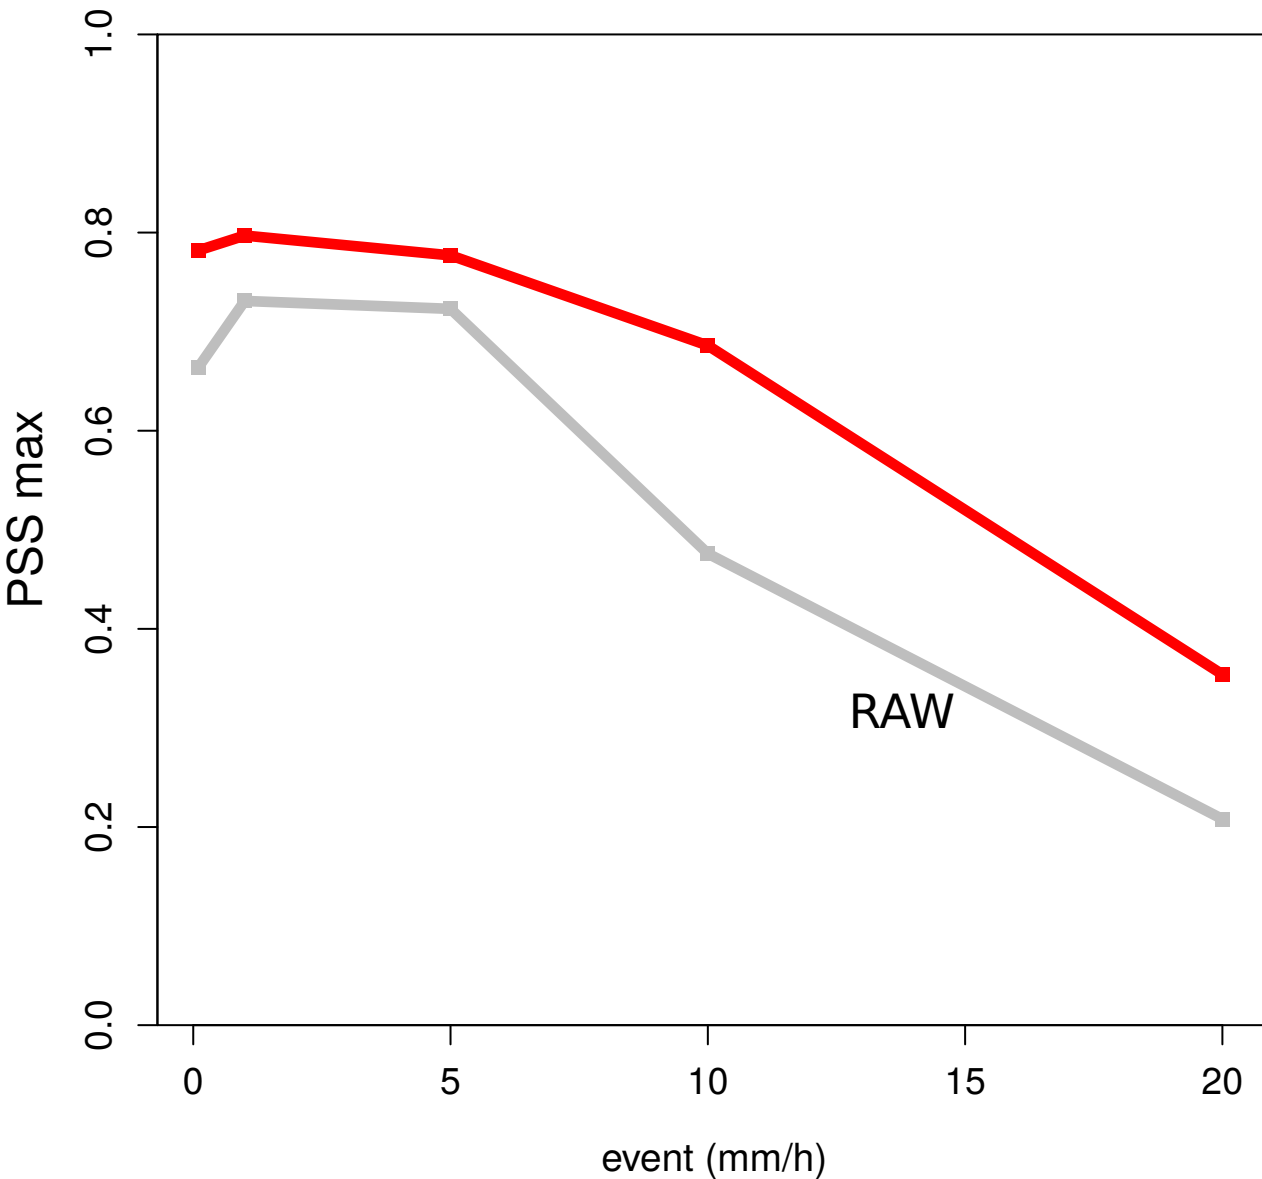

Supplement: Supplementary file 1 [file npg-27-329-2020-supplement.zip › pssmax.pdf]

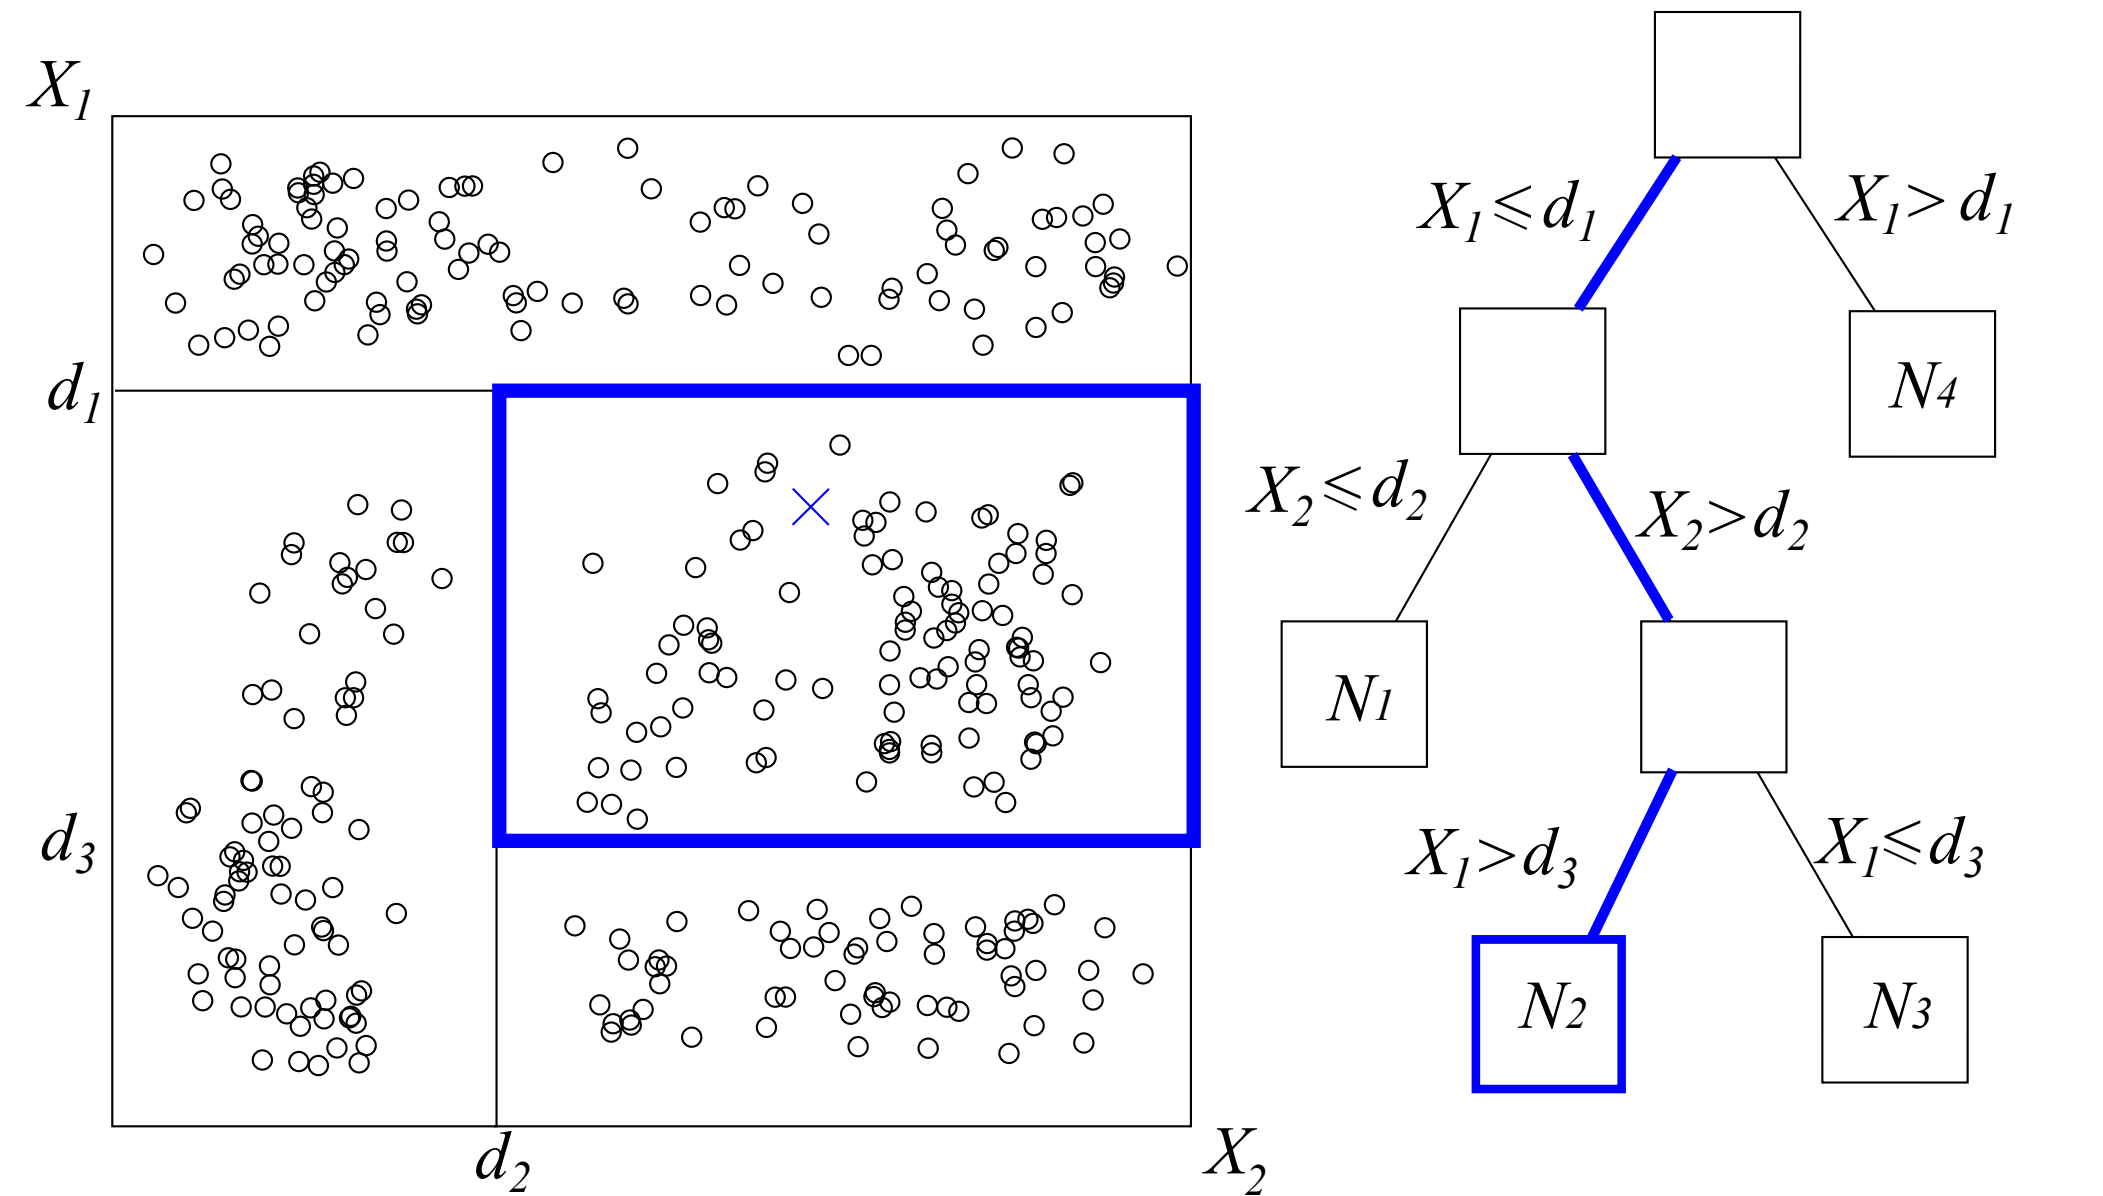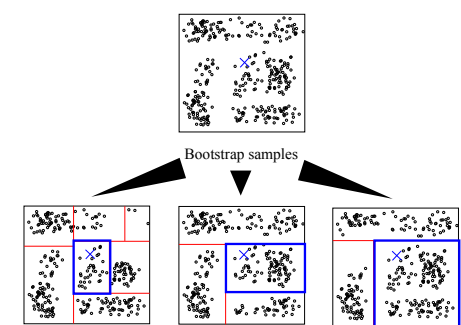

$$\begin{aligned}
 w_i(\times) &= 0 & \bigcirc \\
 w_i(\times) &= 1 & \bullet \\
 w_i(\times) &= 2 & \bullet \\
 w_i(\times) &= 3 & \bullet
 \end{aligned}$$

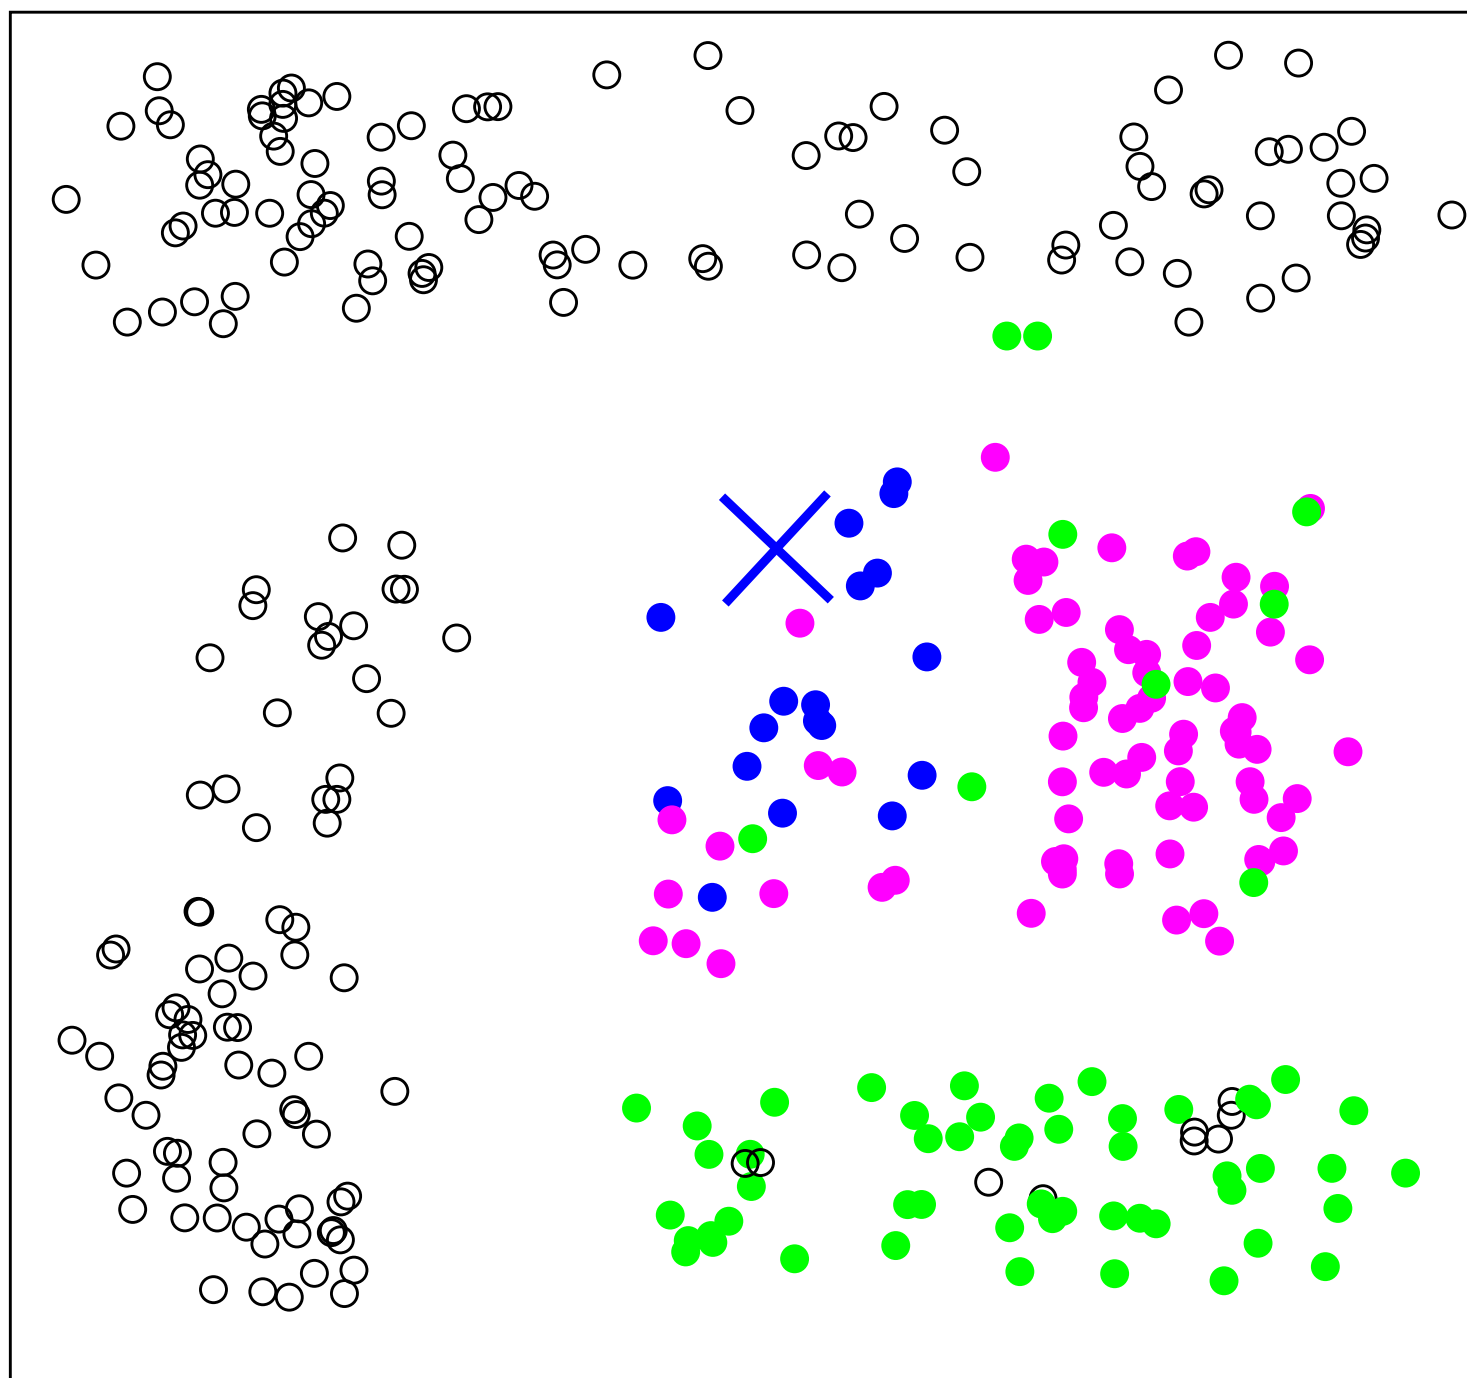

Supplement: Supplementary file 1 [file npg-27-329-2020-supplement.zip › cartqrf.pdf]

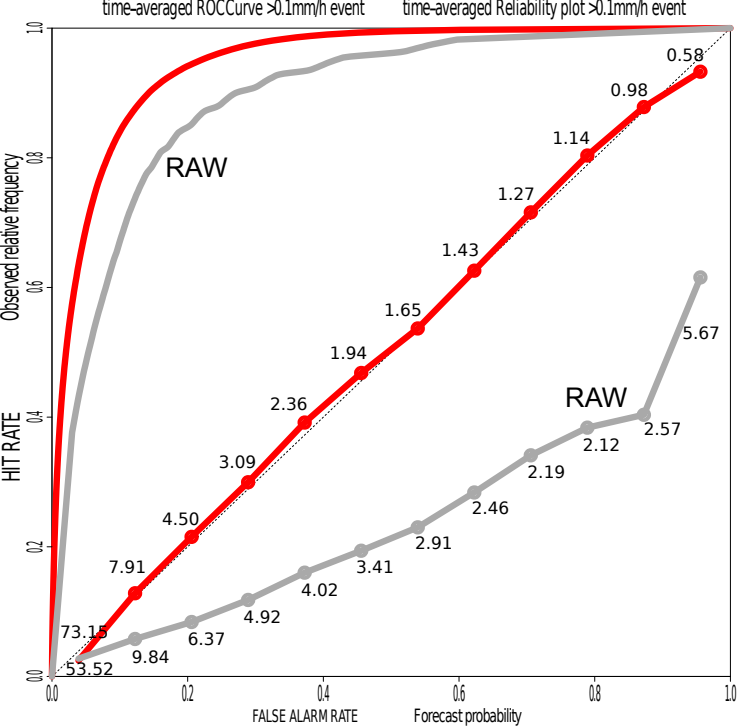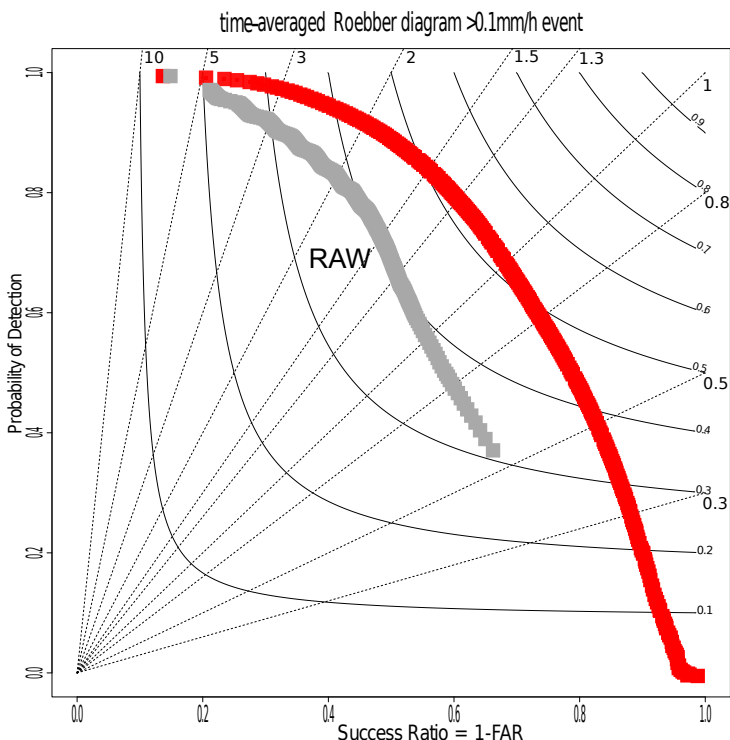

Supplement: Supplementary file 1 [file npg-27-329-2020-supplement.zip › eventzero.pdf]

PG1PEARP : T

Base: 20190310180000 Lead Time: 42 Member: 16

Temperature (°C)

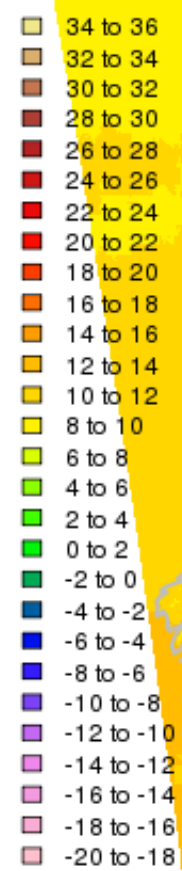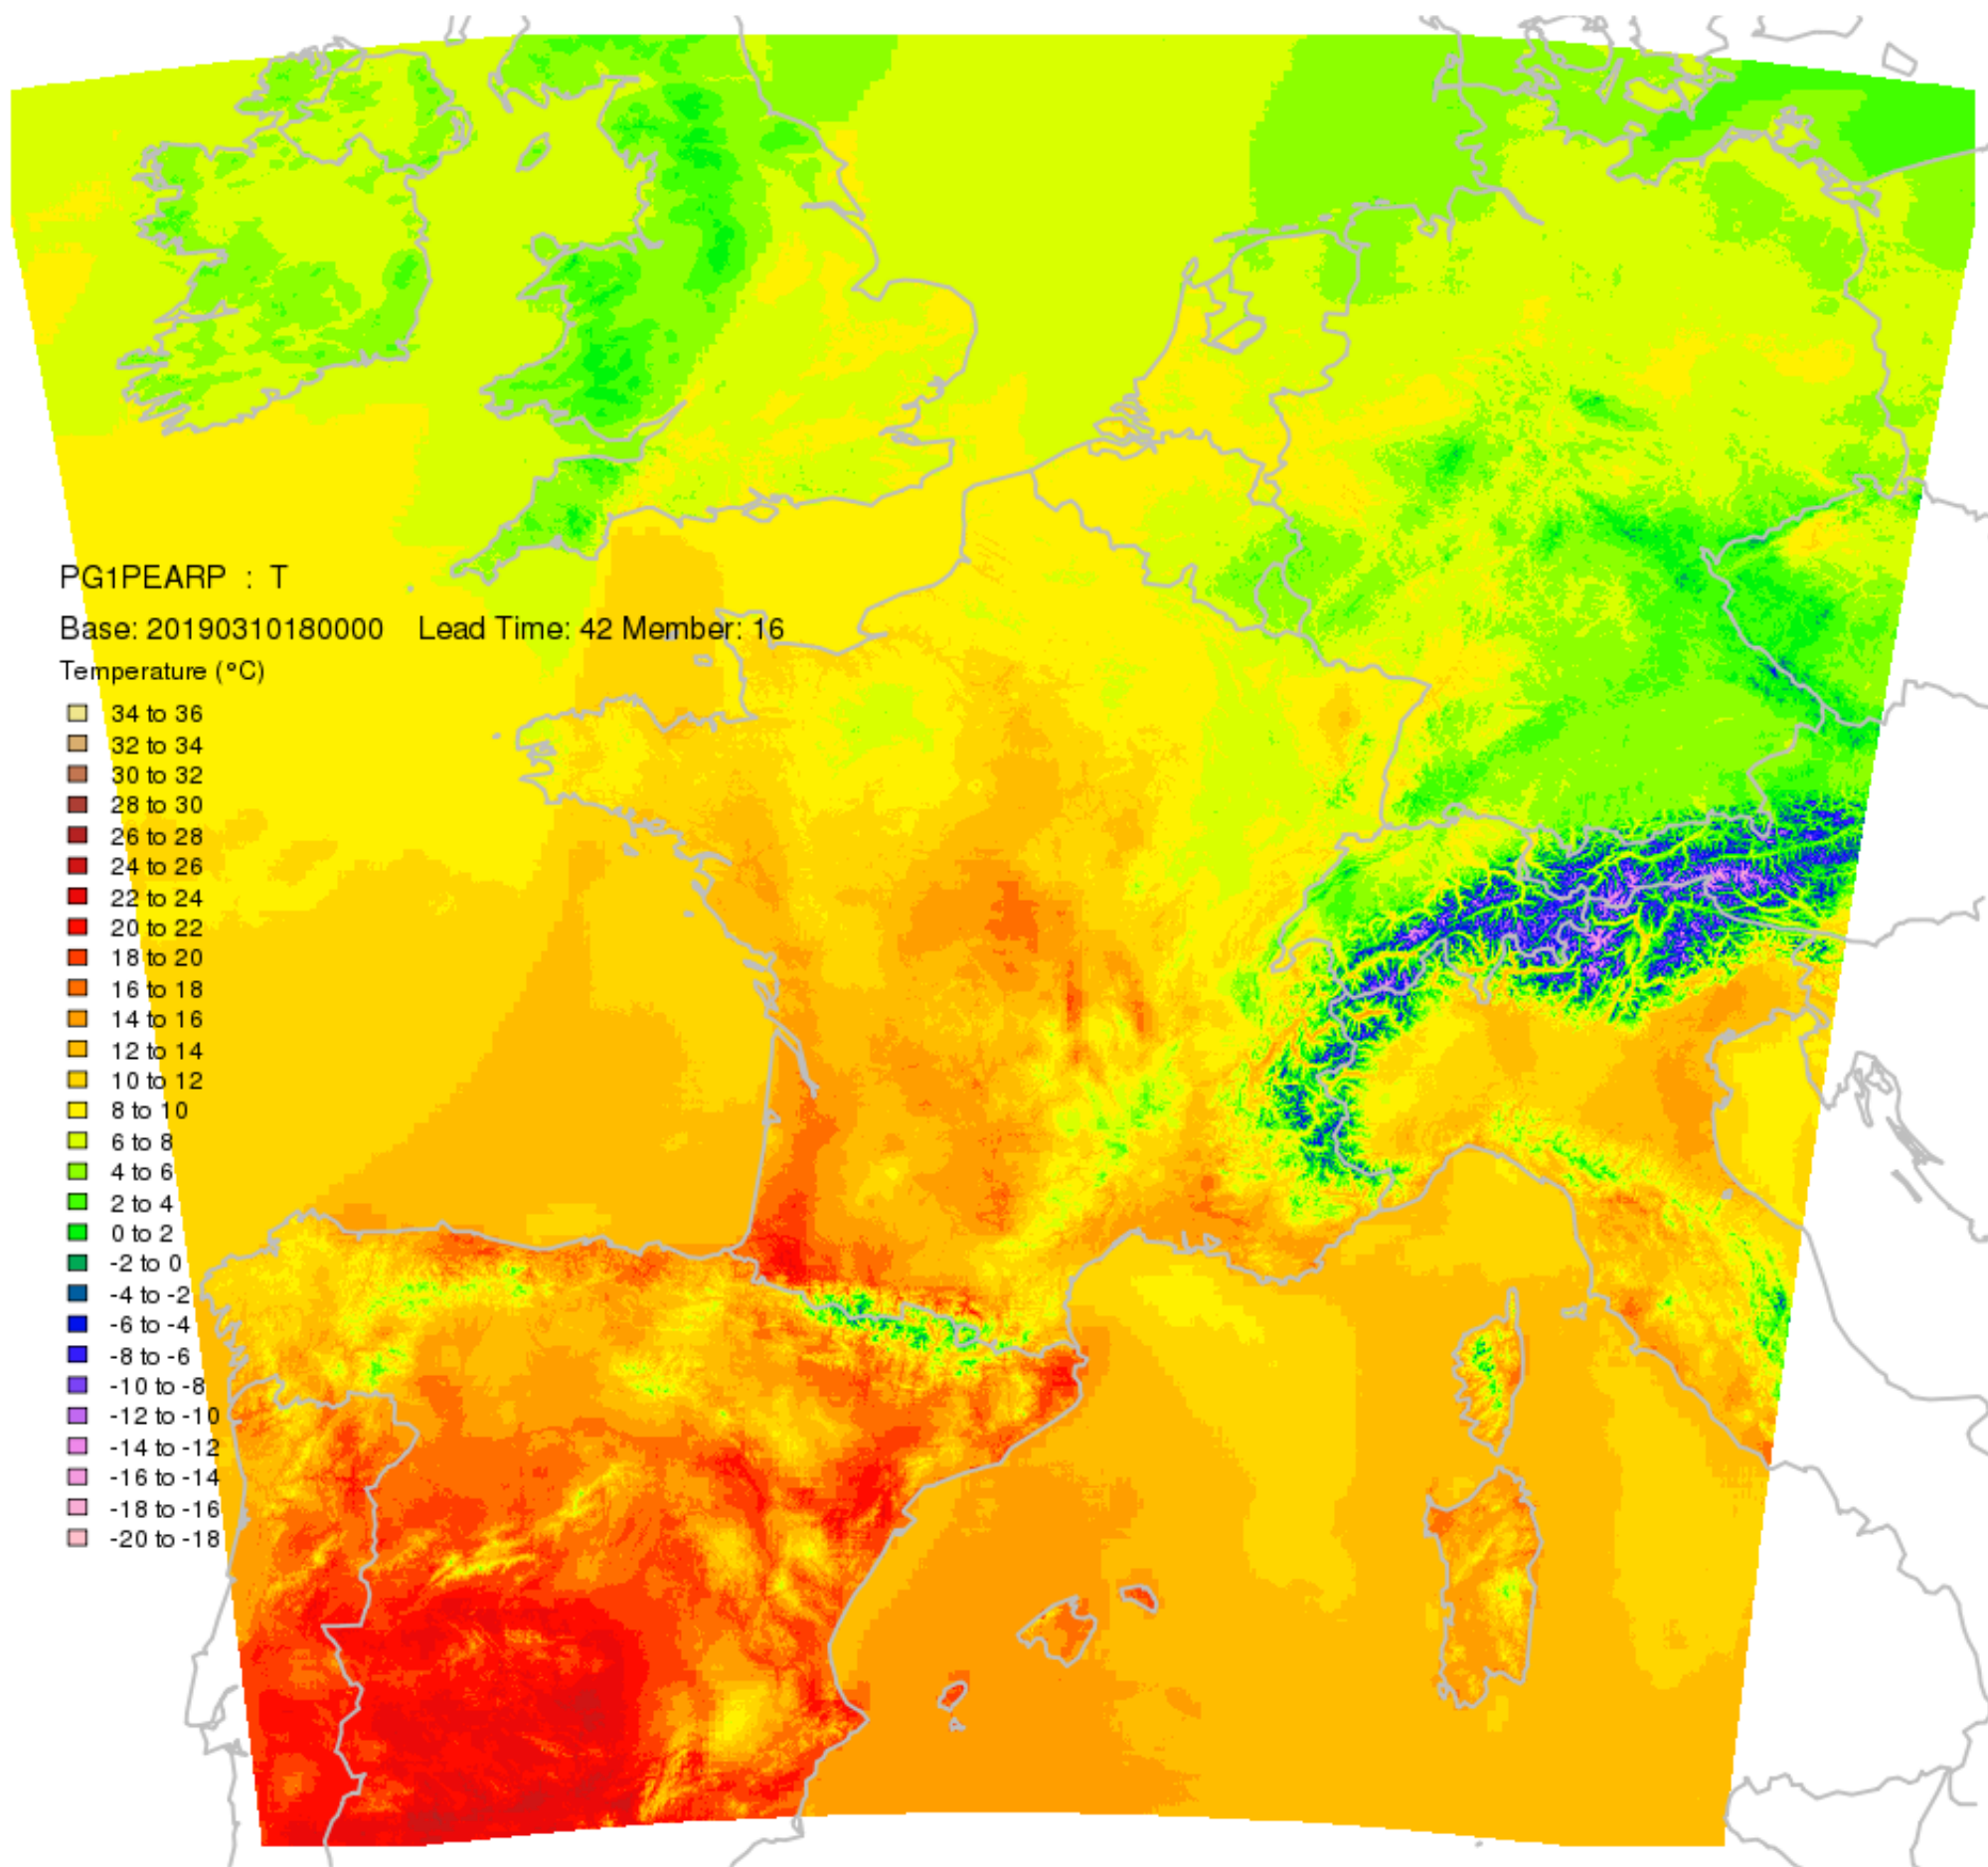

Supplement: Supplementary file 1 [file npg-27-329-2020-supplement.zip › resultf.pdf]
